# Supplementary material for: Pentacyclic Triterpenoids-Based Ionic Compounds: Synthesis, Study of Structure–Antitumor Activity Relationship, Effects on Mitochondria and Activation of Signaling Pathways of Proliferation, Genome Reparation and Early Apoptosis
Source: MDPI journal article supplement (doi:10.3390/cancers15030756), 2023-01-26

**Supplementary Material for**

**Pentacyclic Triterpenoid's Based Ionic Compounds:  
Synthesis, Study of Structure-Antitumor Activity  
Relationship, Effects on Mitochondria and Activation of  
Signaling Pathways of Prolife-ration, Genome  
Reparation and Early Apoptosis**

Lilya U. Dzhemileva \*, Regina A. Tuktarova, Usein M. Dzhemilev, and Vladimir A. D'yakonov \*

N.D. Zelinsky Institute of Organic Chemistry, Russian Academy of Sciences, Leninsky Prospect 47,  
Moscow, 119991, Russia.

## Table of contents

|                                                                 |    |
|-----------------------------------------------------------------|----|
| 1. $^1\text{H}$ and $^{13}\text{C}$ NMR Spectra of the Products | S3 |
|-----------------------------------------------------------------|----|

## $^1\text{H}$ and $^{13}\text{C}$ NMR Spectra of all Products

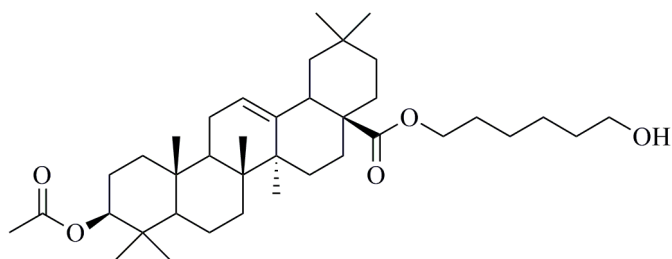

**Figure S1.**  $^{13}\text{C}$  NMR Spectrum of compound 2 (125 MHz,  $\text{CDCl}_3$ )

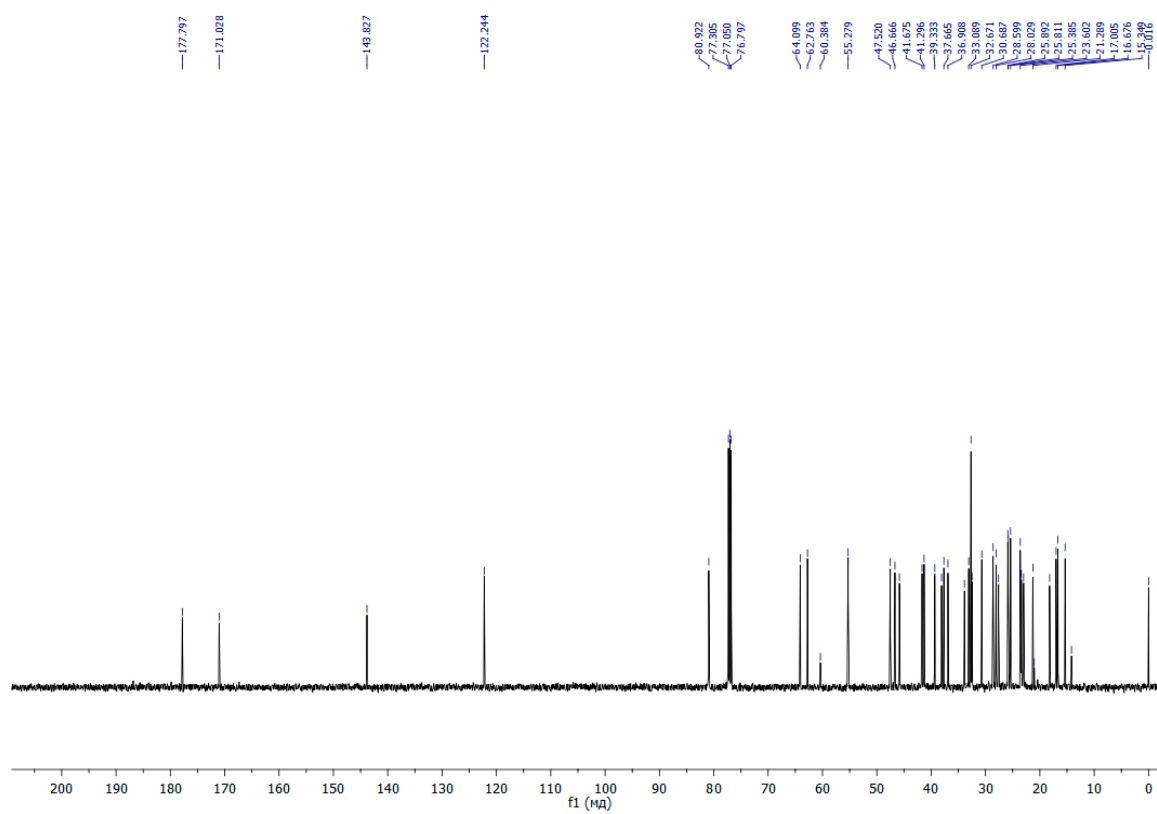

**Figure S2.**  $^1\text{H}$  NMR Spectrum of compound **2** (500 MHz,  $\text{CDCl}_3$ )

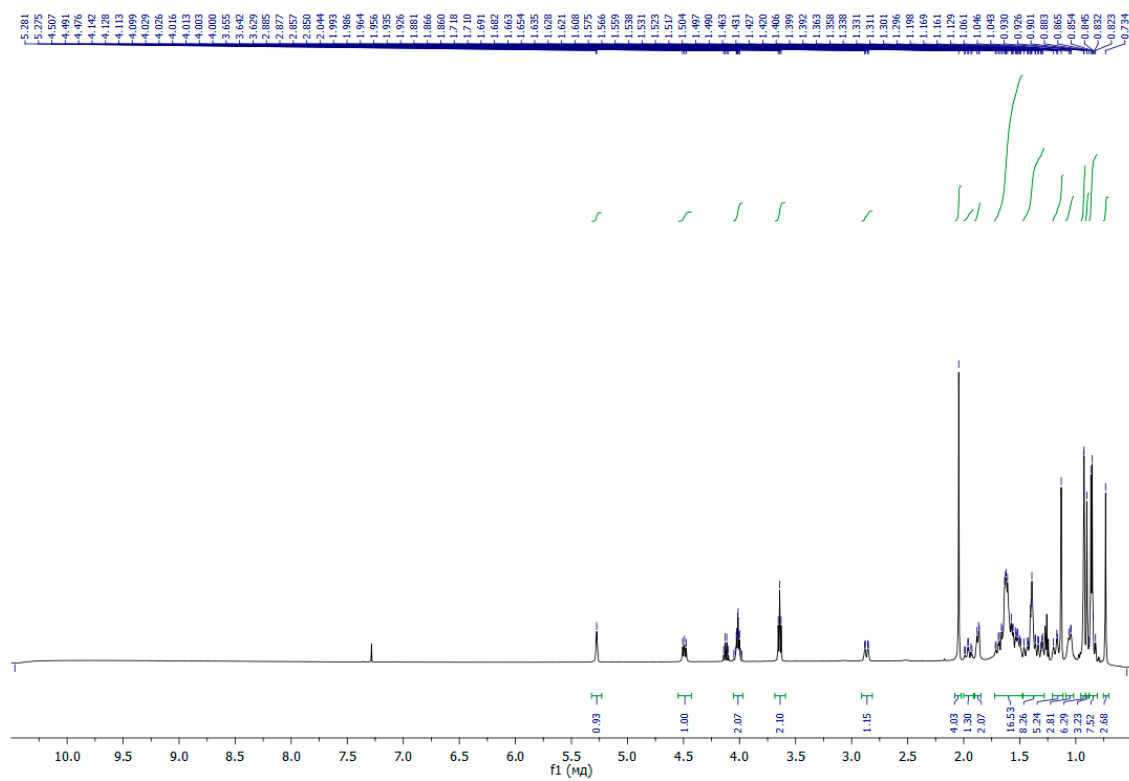

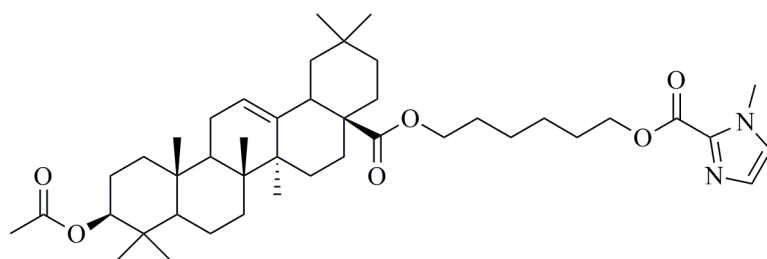

**Figure S3.**  $^{13}\text{C}$  NMR Spectrum of compound **3** (100 MHz,  $\text{CDCl}_3$ )

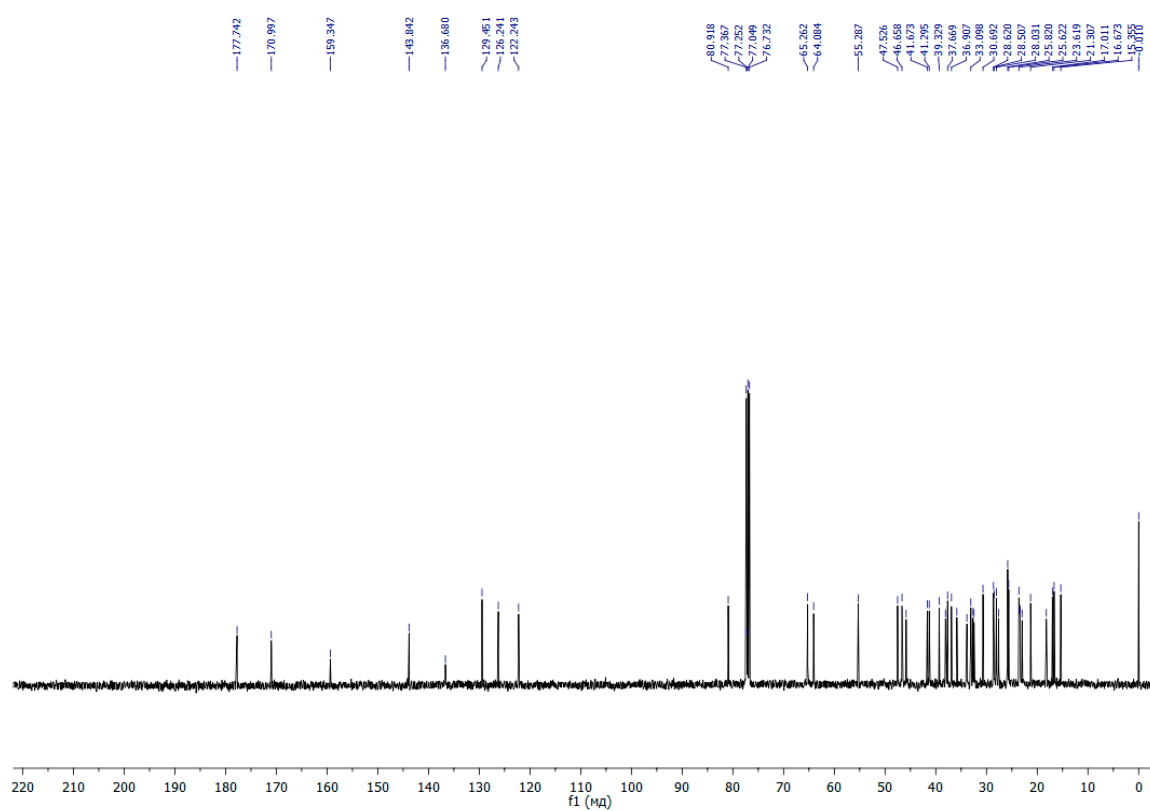

**Figure S4.**  $^1\text{H}$  NMR Spectrum of compound **3** (400 MHz,  $\text{CDCl}_3$ )

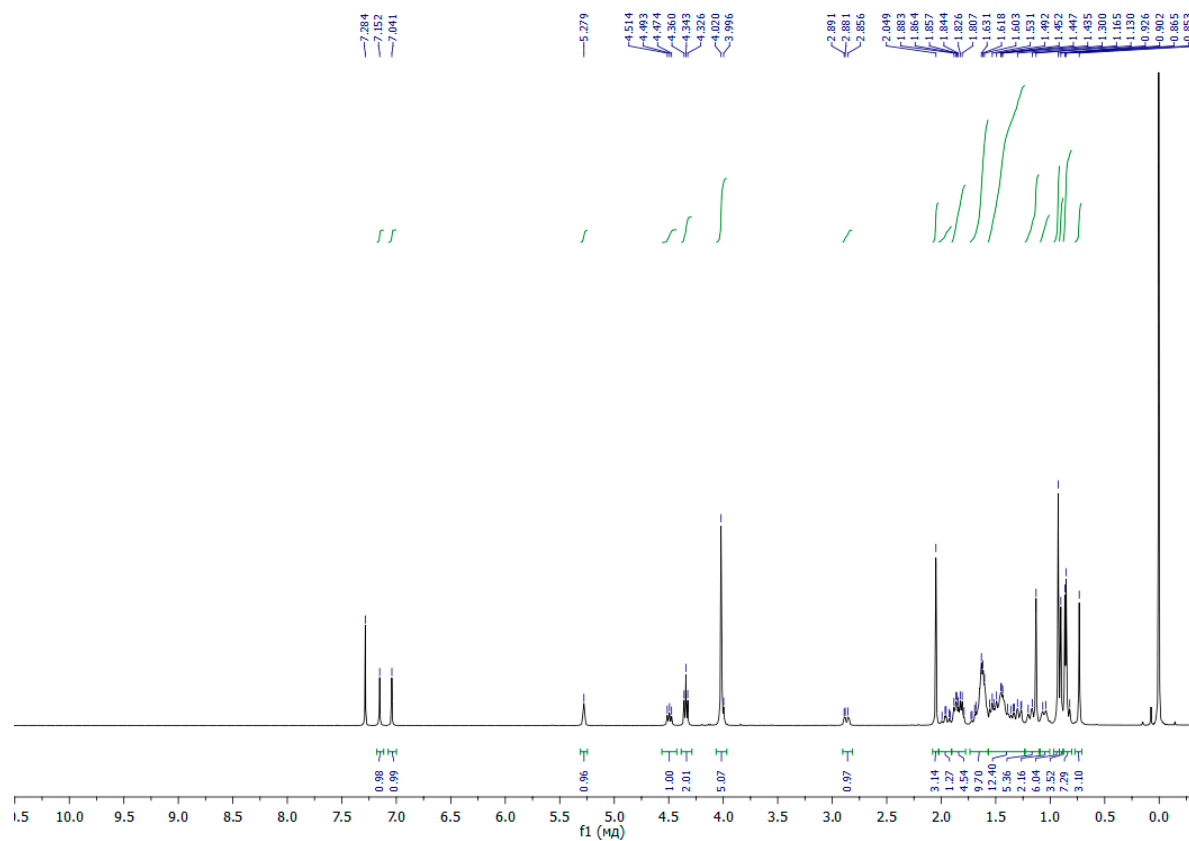

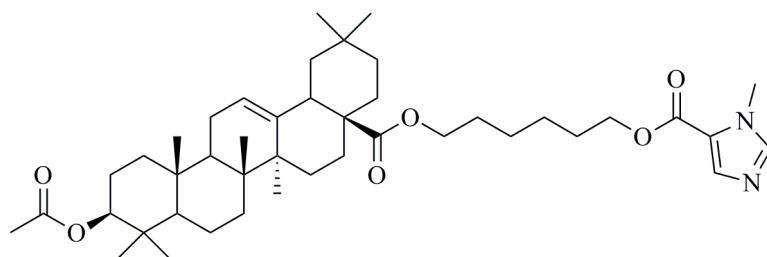

**Figure S5.**  $^{13}\text{C}$  NMR Spectrum of compound **4** (125 MHz,  $\text{CDCl}_3$ )

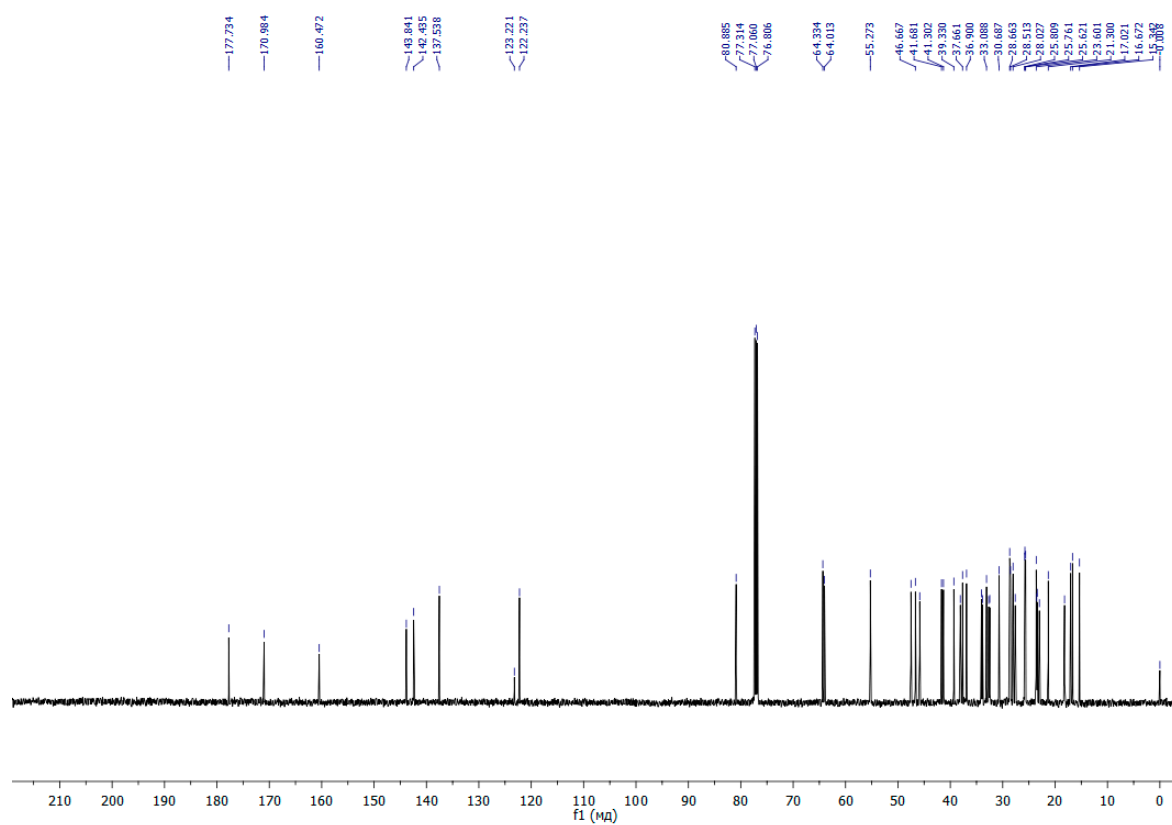

**Figure S6.**  $^1\text{H}$  NMR Spectrum of compound **4** (500 MHz,  $\text{CDCl}_3$ )

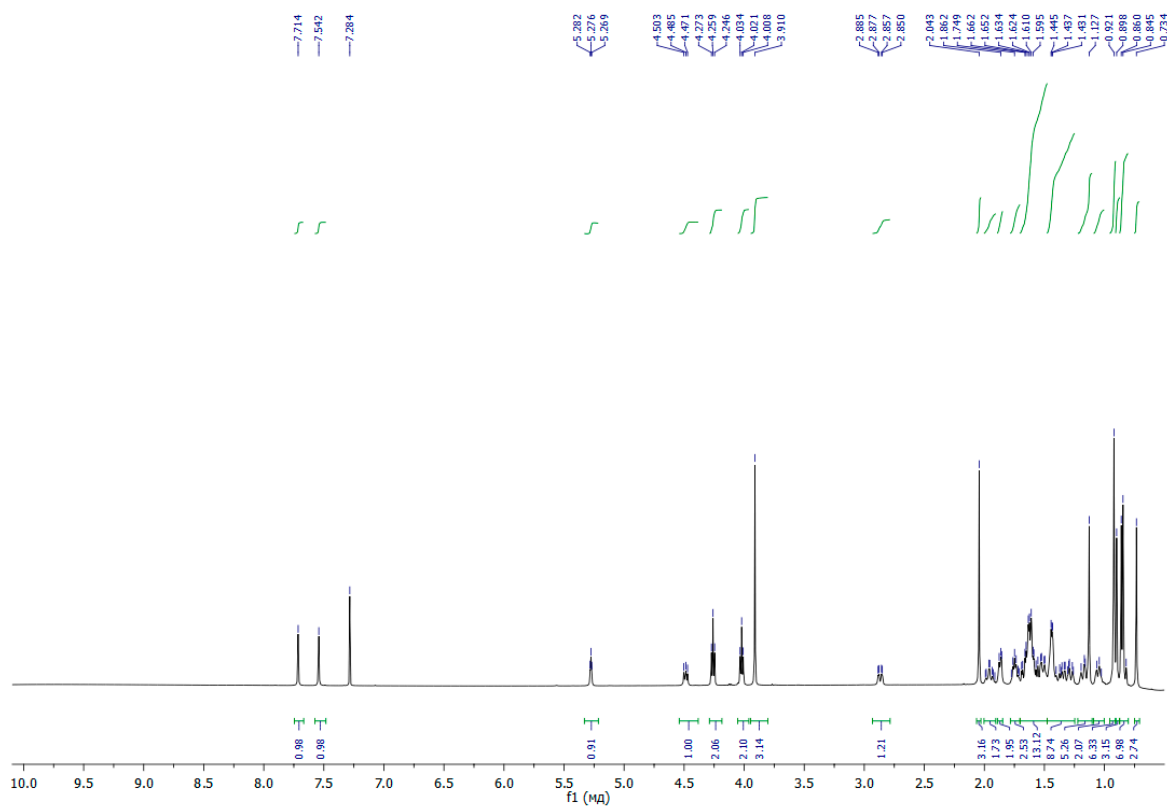



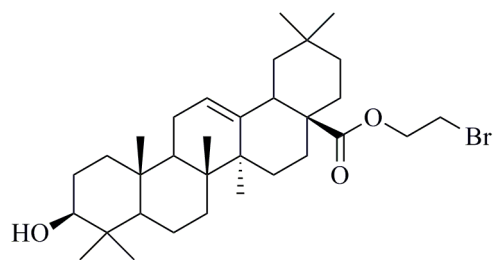

**Figure S7.**  $^{13}\text{C}$  NMR Spectrum of compound **6a** (100 MHz,  $\text{CDCl}_3$ )

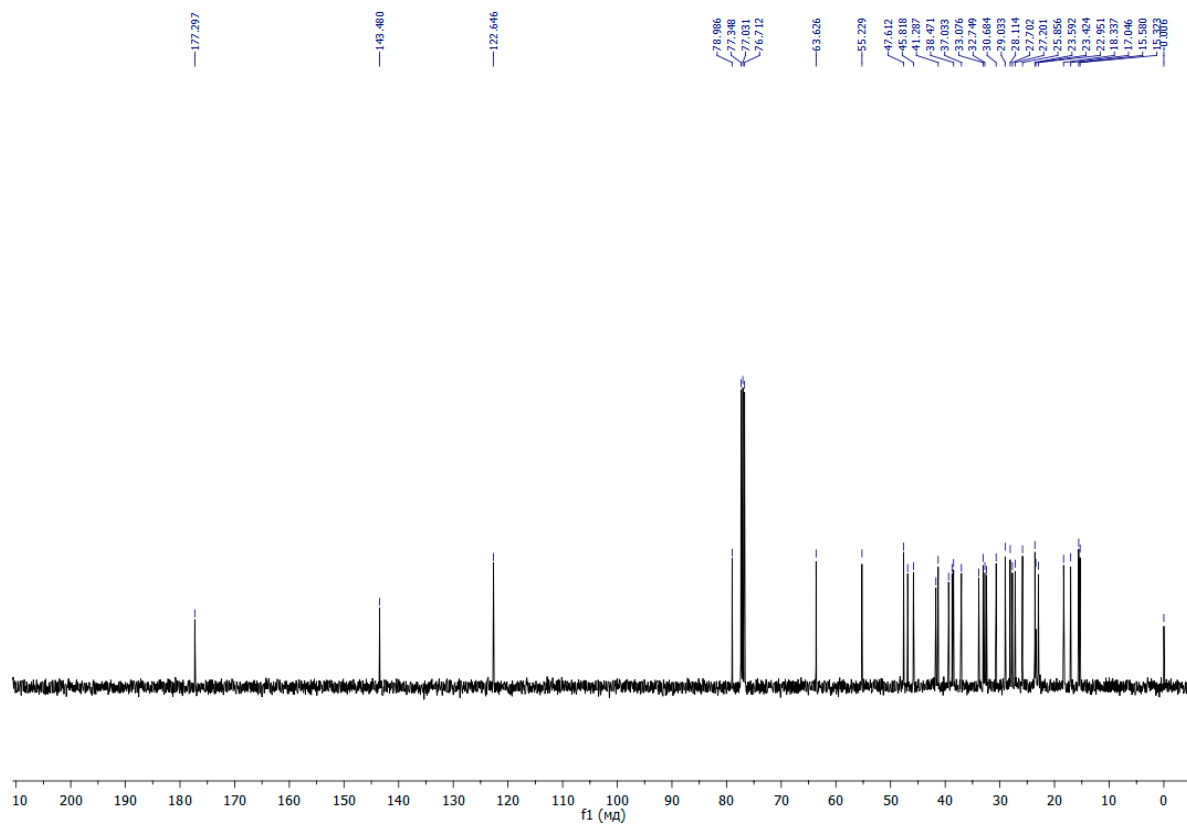

**Figure S8.**  $^1\text{H}$  NMR Spectrum of compound **6a** (400 MHz,  $\text{CDCl}_3$ )

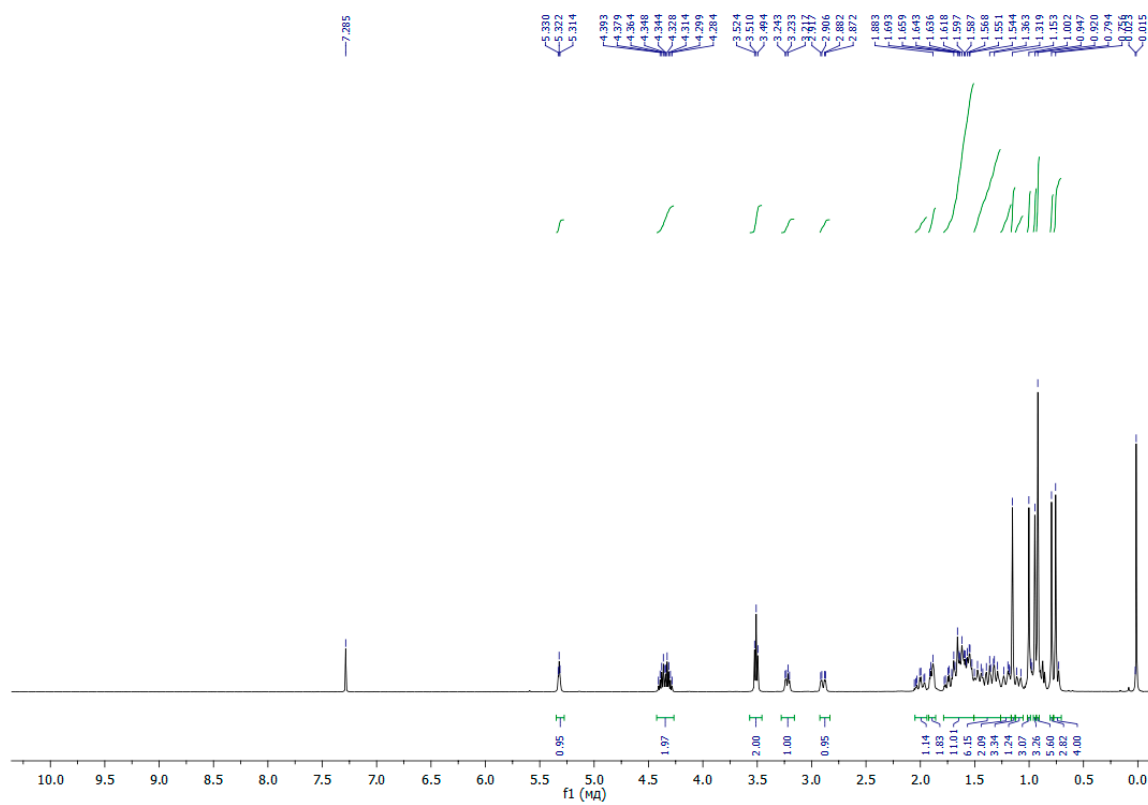

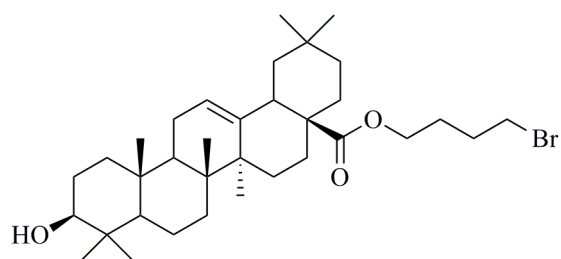

**Figure S9.**  $^{13}\text{C}$  NMR Spectrum of compound **6b** (125 MHz,  $\text{CDCl}_3$ )

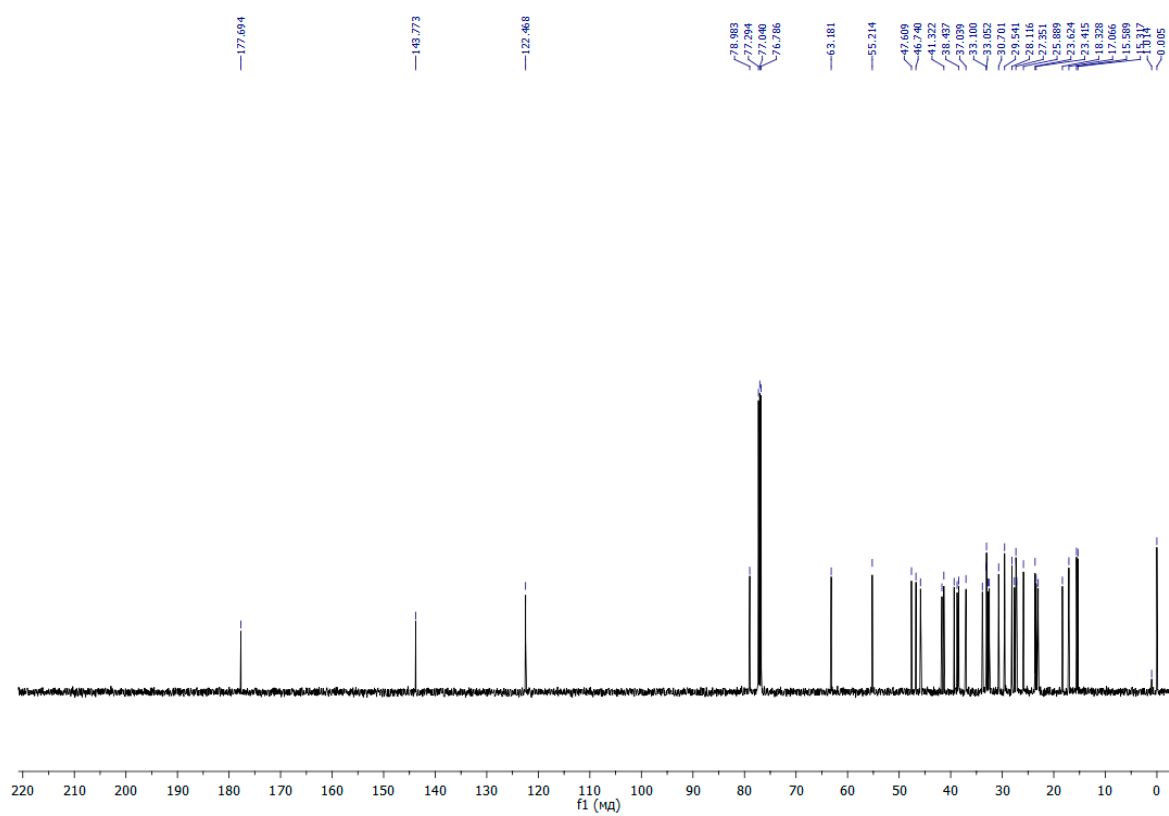

**Figure S10.**  $^1\text{H}$  NMR Spectrum of compound **6b** (500 MHz,  $\text{CDCl}_3$ )

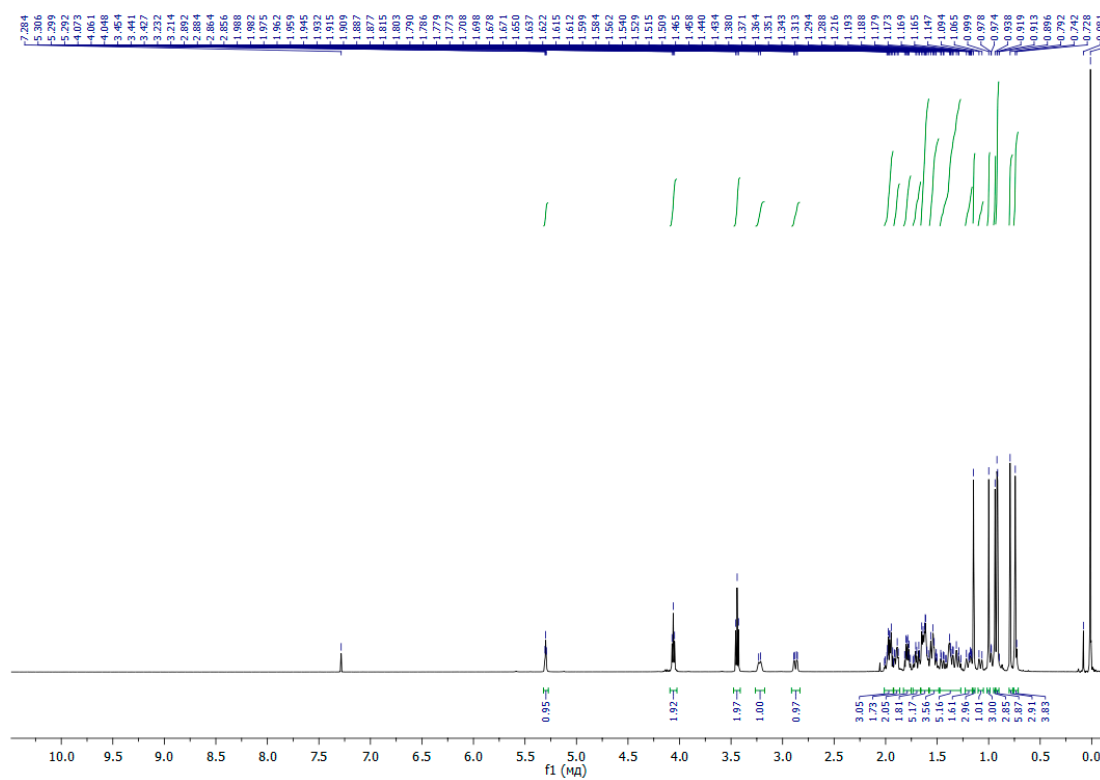

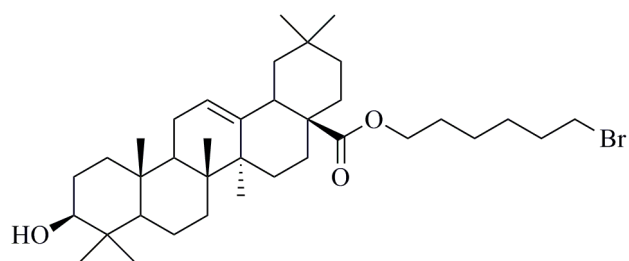

**Figure S11.**  $^{13}\text{C}$  NMR Spectrum of compound **6c** (125 MHz,  $\text{CDCl}_3$ )

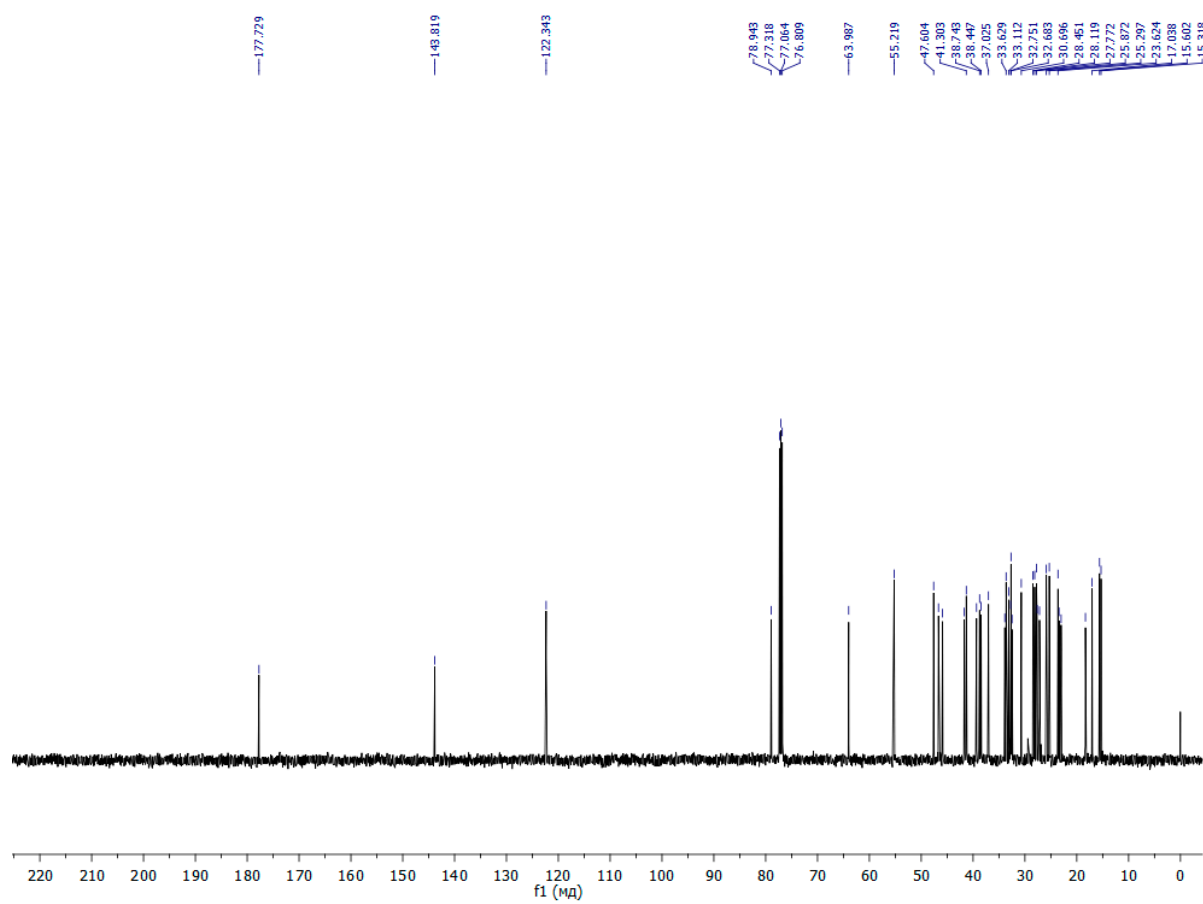

**Figure S12.**  $^1\text{H}$  NMR Spectrum of compound **6c** (500 MHz,  $\text{CDCl}_3$ )

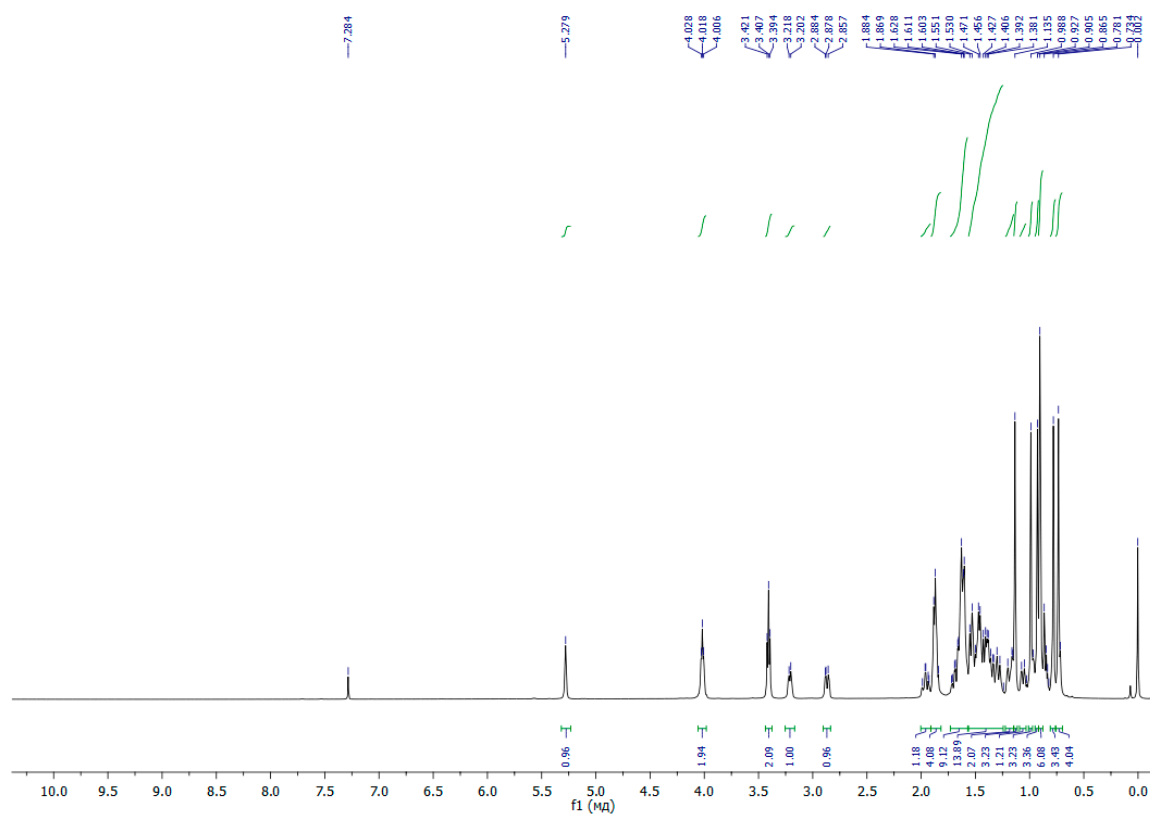

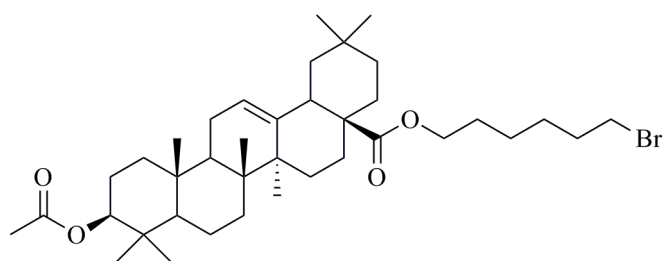

**Figure S13.**  $^{13}\text{C}$  NMR Spectrum of compound **6d** (125 MHz,  $\text{CDCl}_3$ )

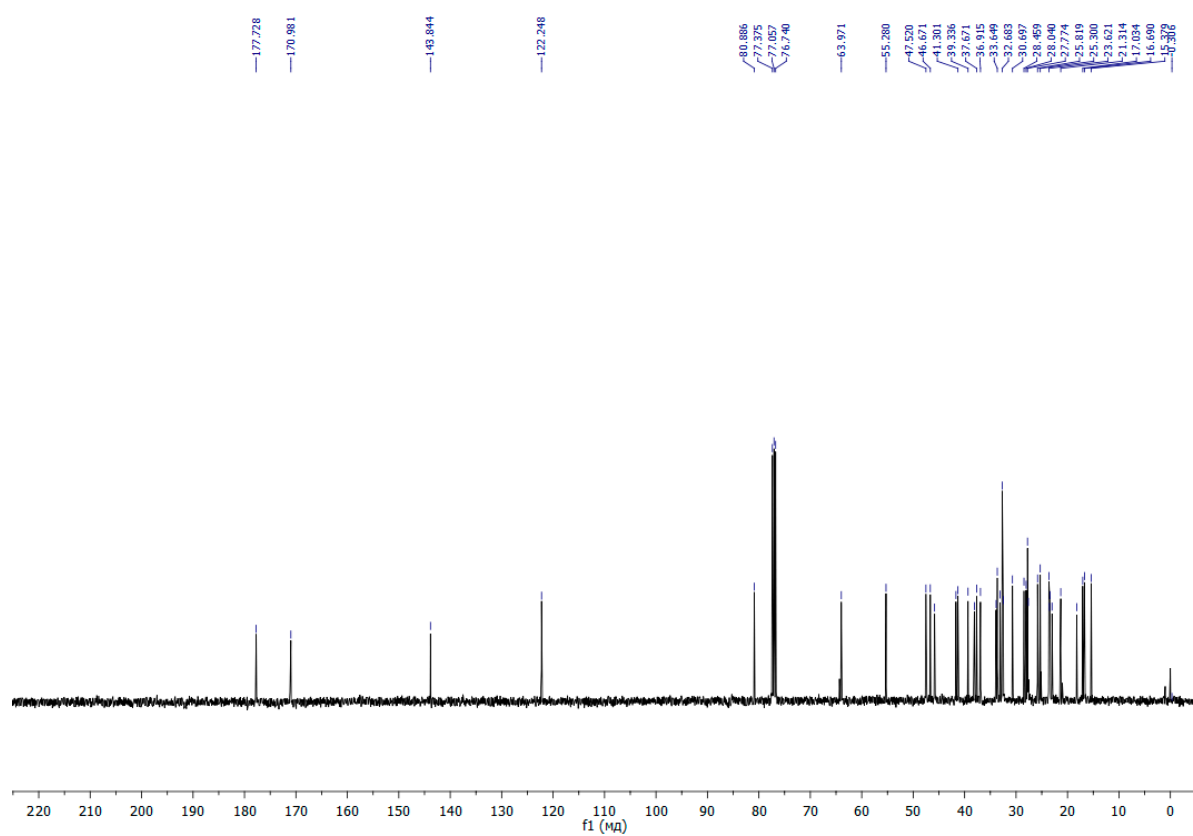

**Figure S14.**  $^1\text{H}$  NMR Spectrum of compound **6d** (500 MHz,  $\text{CDCl}_3$ )

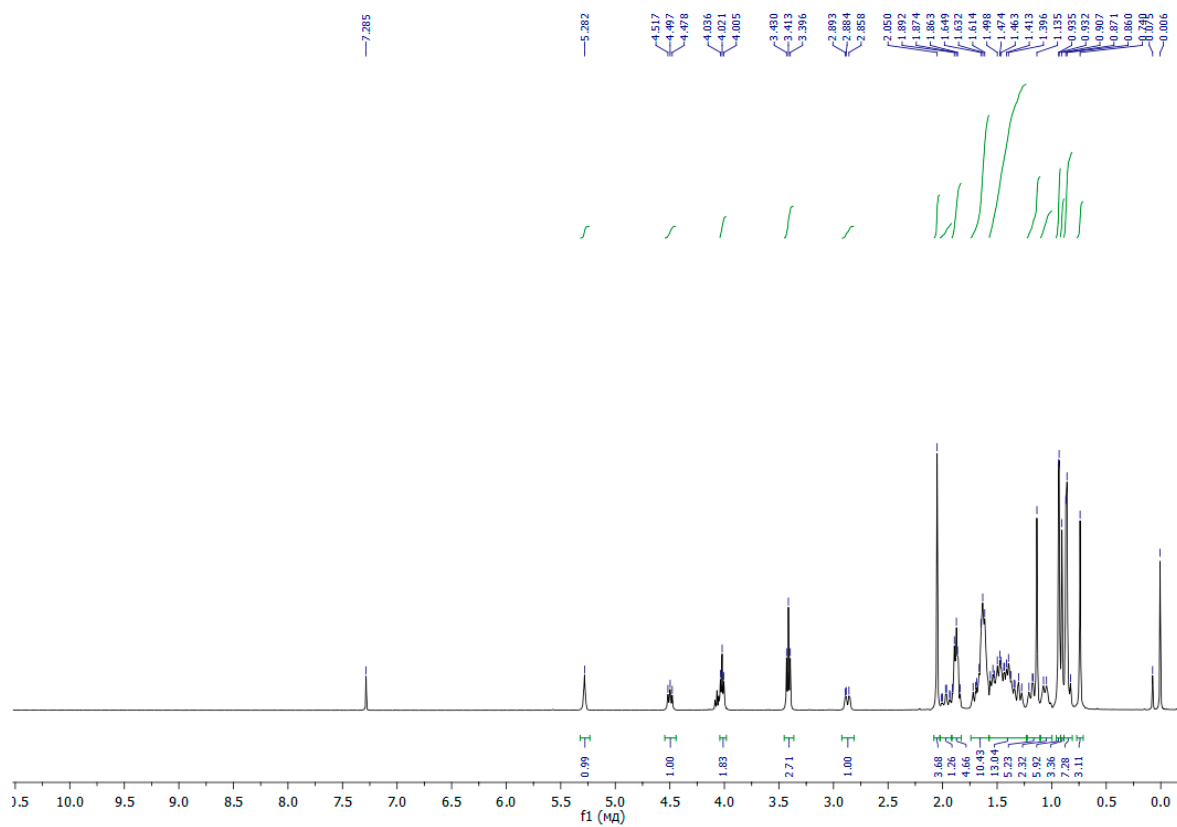



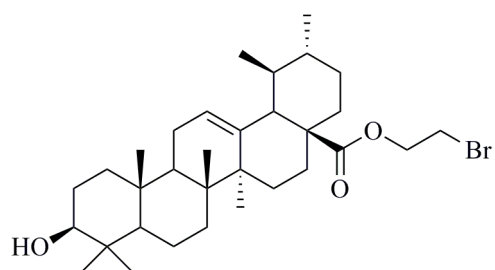

**Figure S15.**  $^{13}\text{C}$  NMR Spectrum of compound 7a (100 MHz,  $\text{CDCl}_3$ )

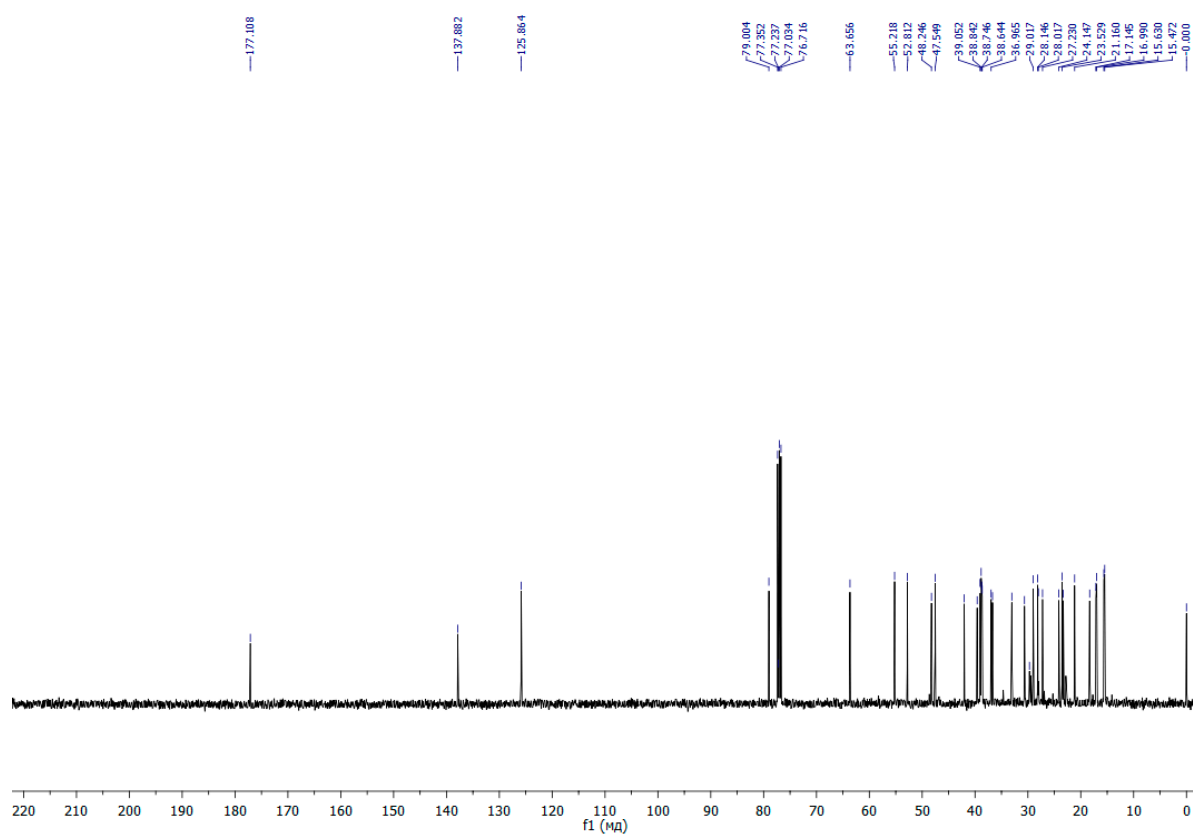

**Figure S16.**  $^1\text{H}$  NMR Spectrum of compound **7a** (400 MHz,  $\text{CDCl}_3$ )

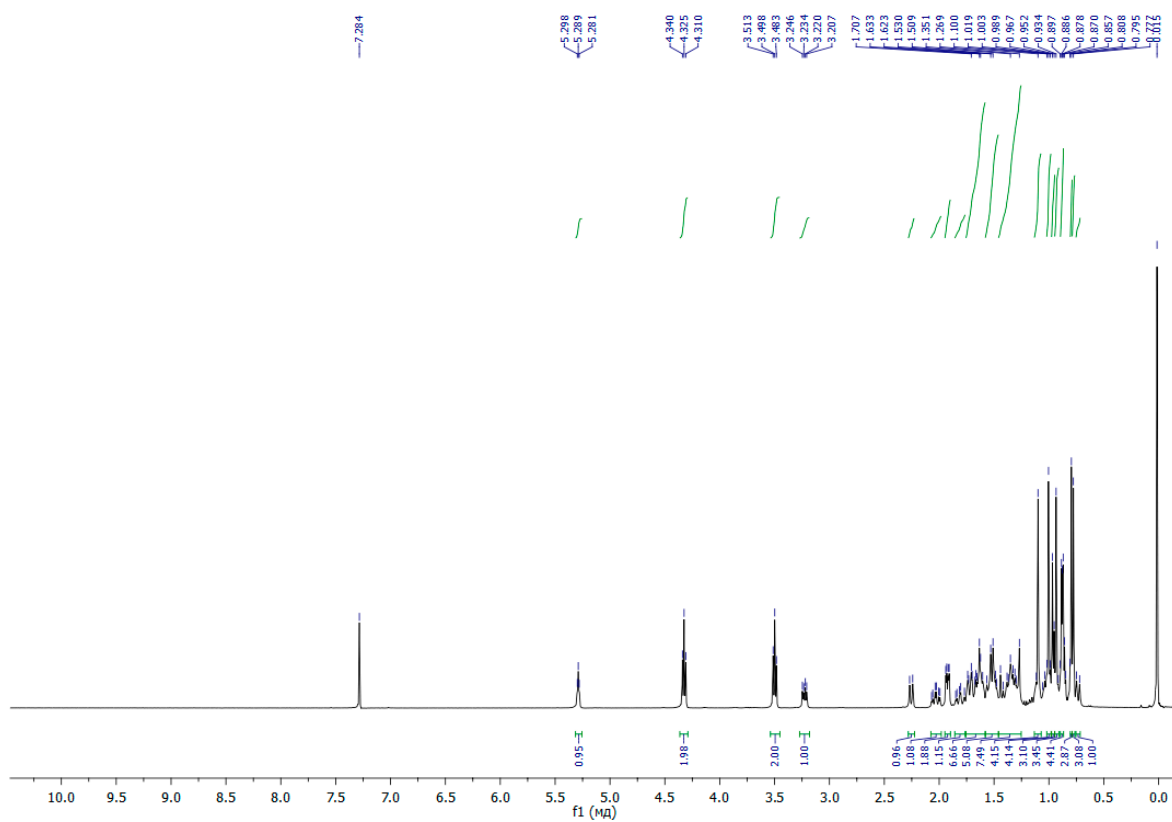

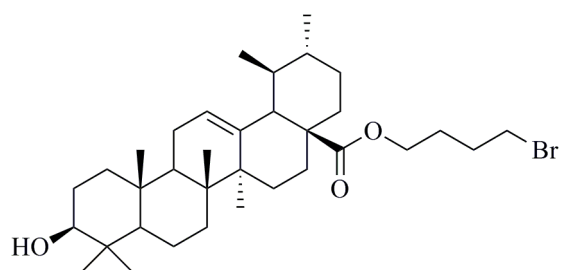

**Figure S17.**  $^{13}\text{C}$  NMR Spectrum of compound **7b** (125 MHz,  $\text{CDCl}_3$ )

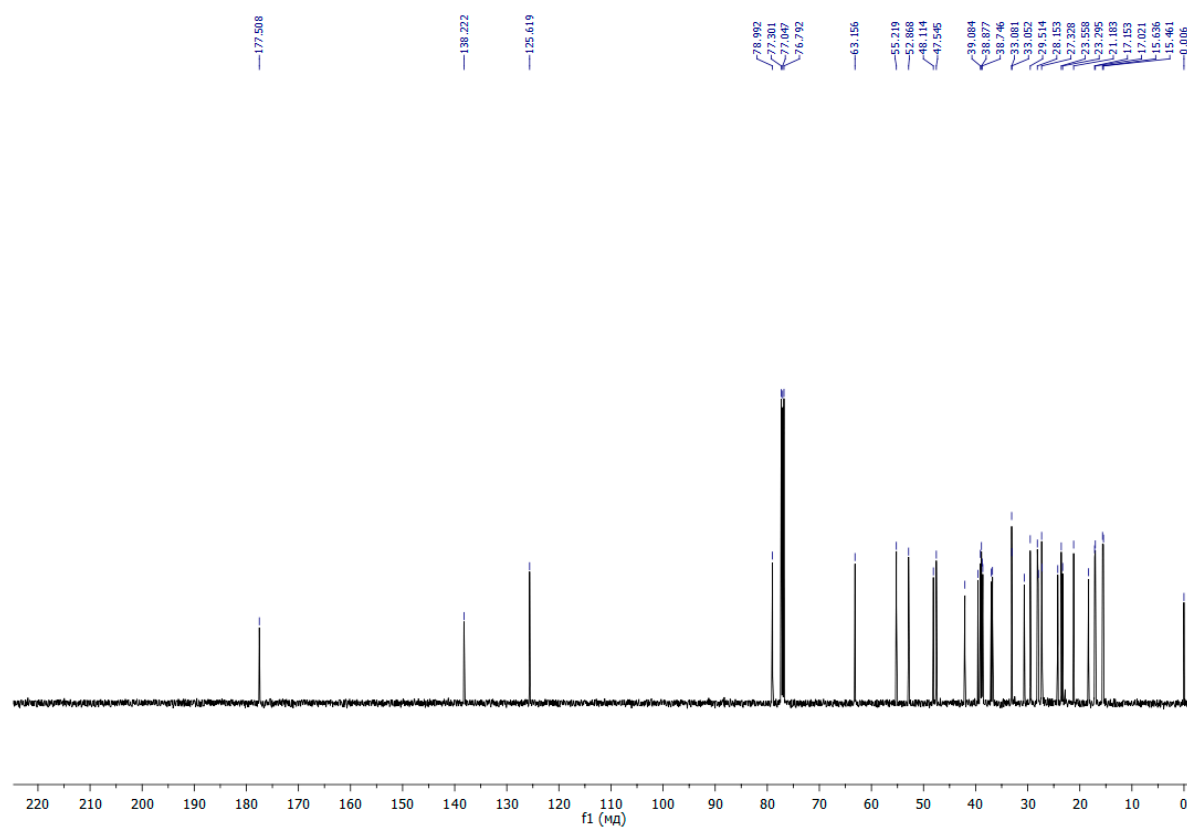

**Figure S18.**  $^1\text{H}$  NMR Spectrum of compound **7b** (500 MHz,  $\text{CDCl}_3$ )

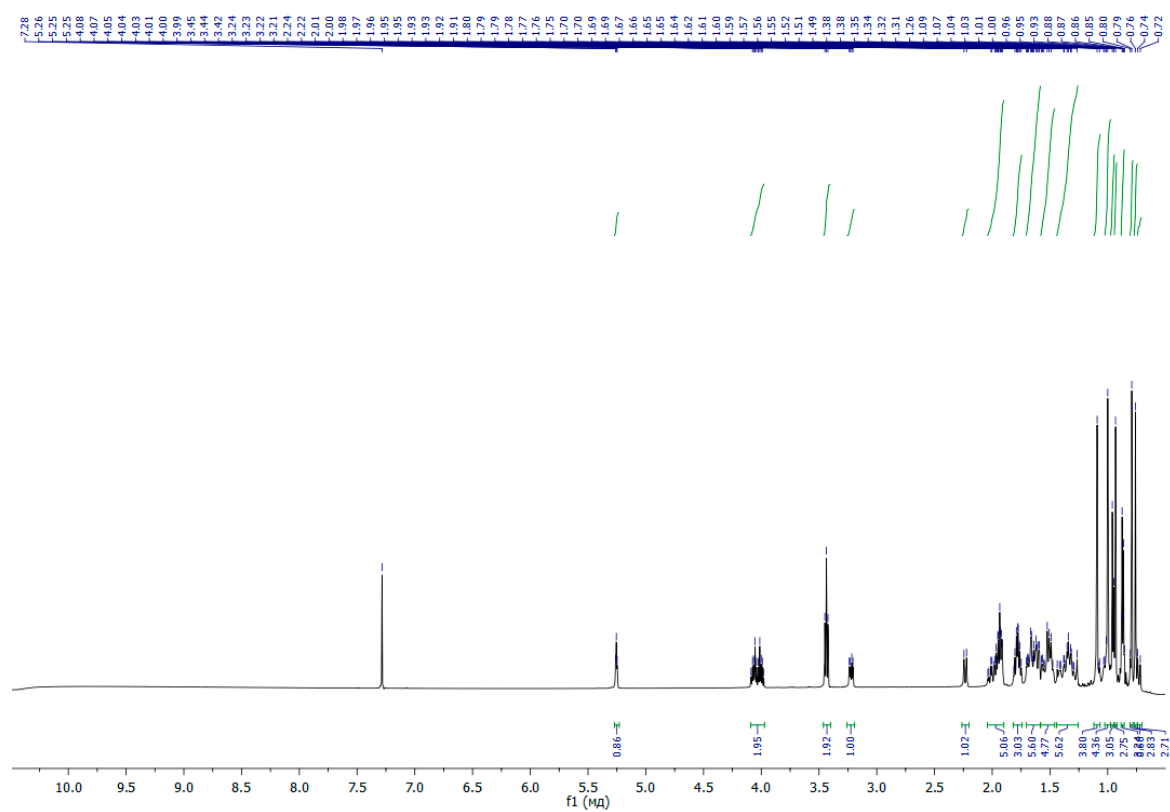

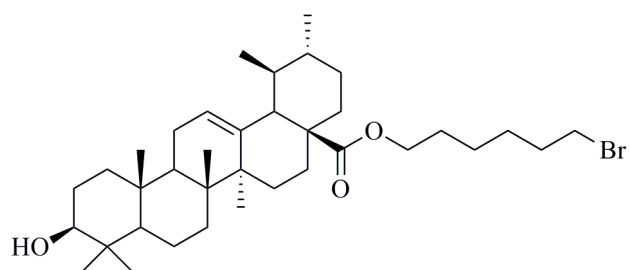

**Figure S19.**  $^{13}\text{C}$  NMR Spectrum of compound **7c** (125 MHz,  $\text{CDCl}_3$ )

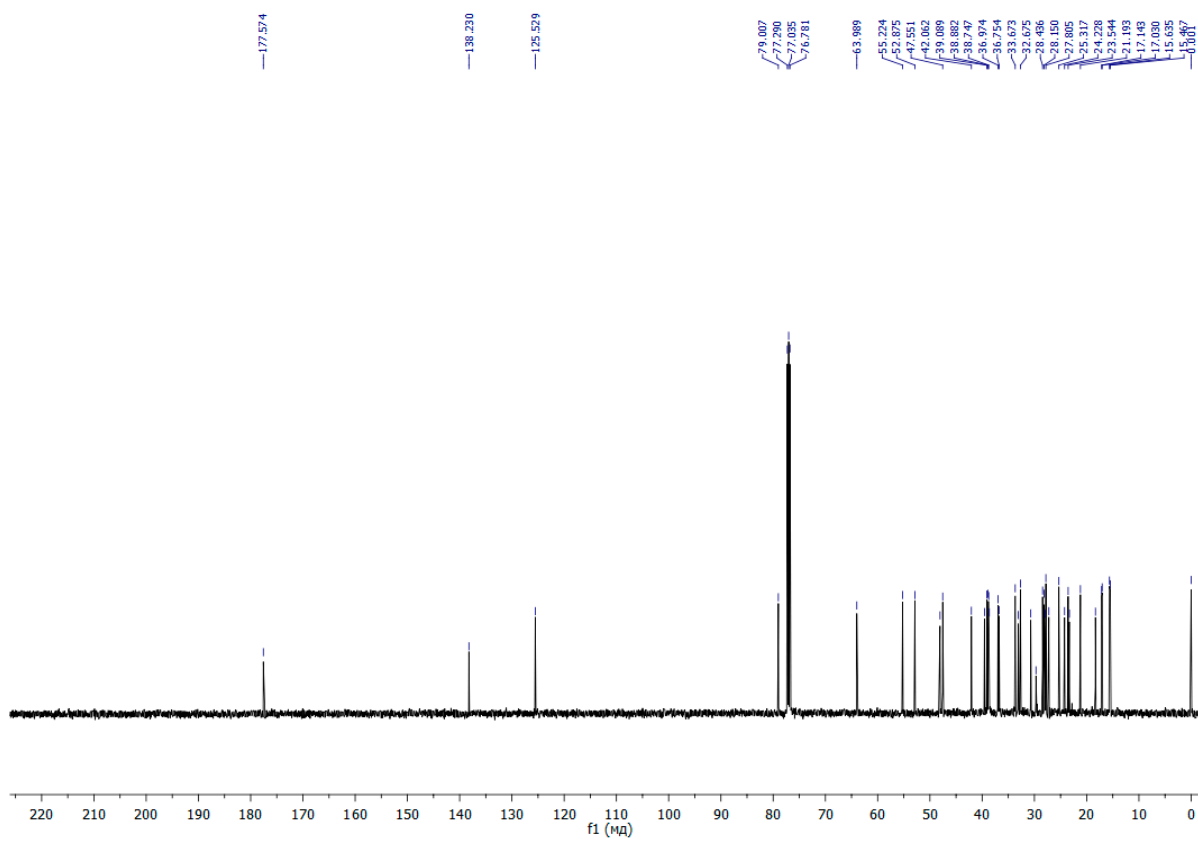

**Figure S20.**  $^1\text{H}$  NMR Spectrum of compound **7c** (500 MHz,  $\text{CDCl}_3$ )

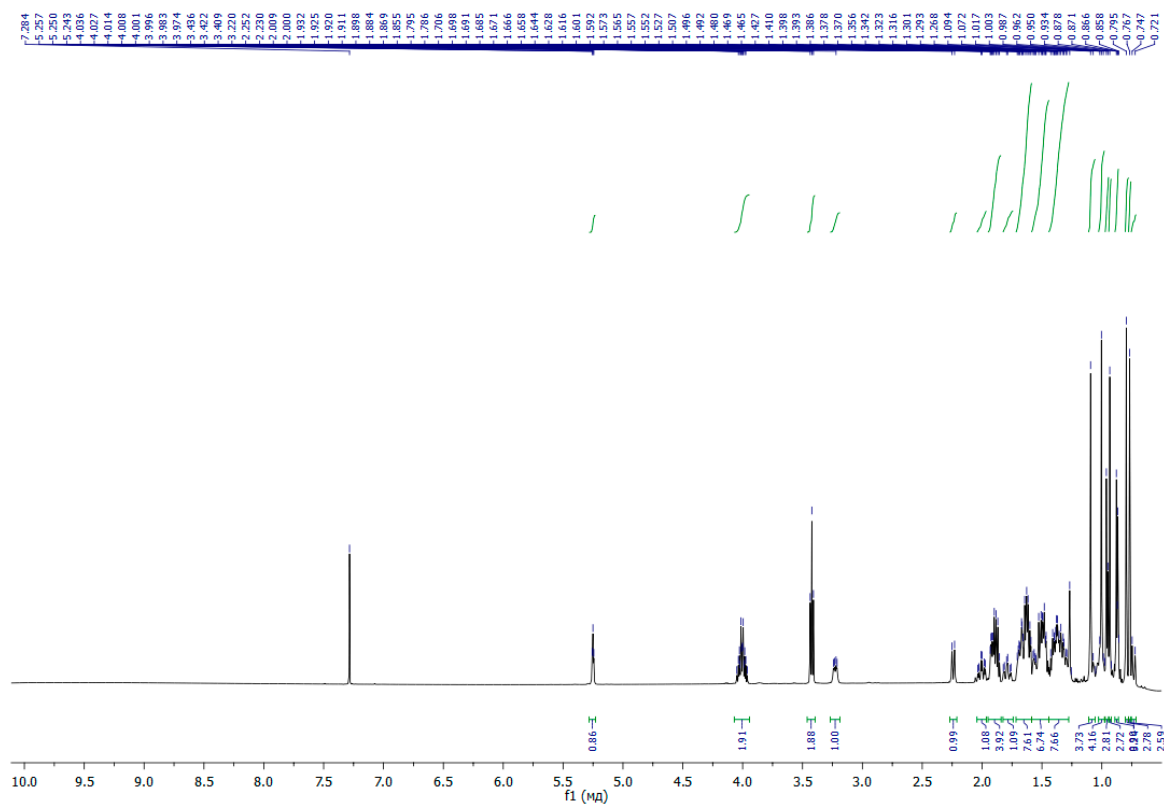

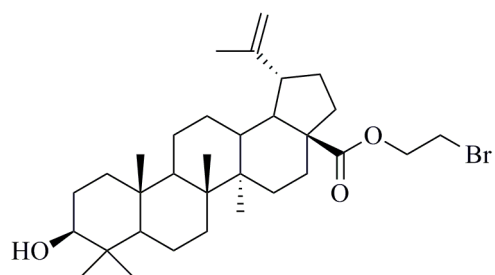

**Figure S21.**  $^{13}\text{C}$  NMR Spectrum of compound **8a** (125 MHz,  $\text{CDCl}_3$ )

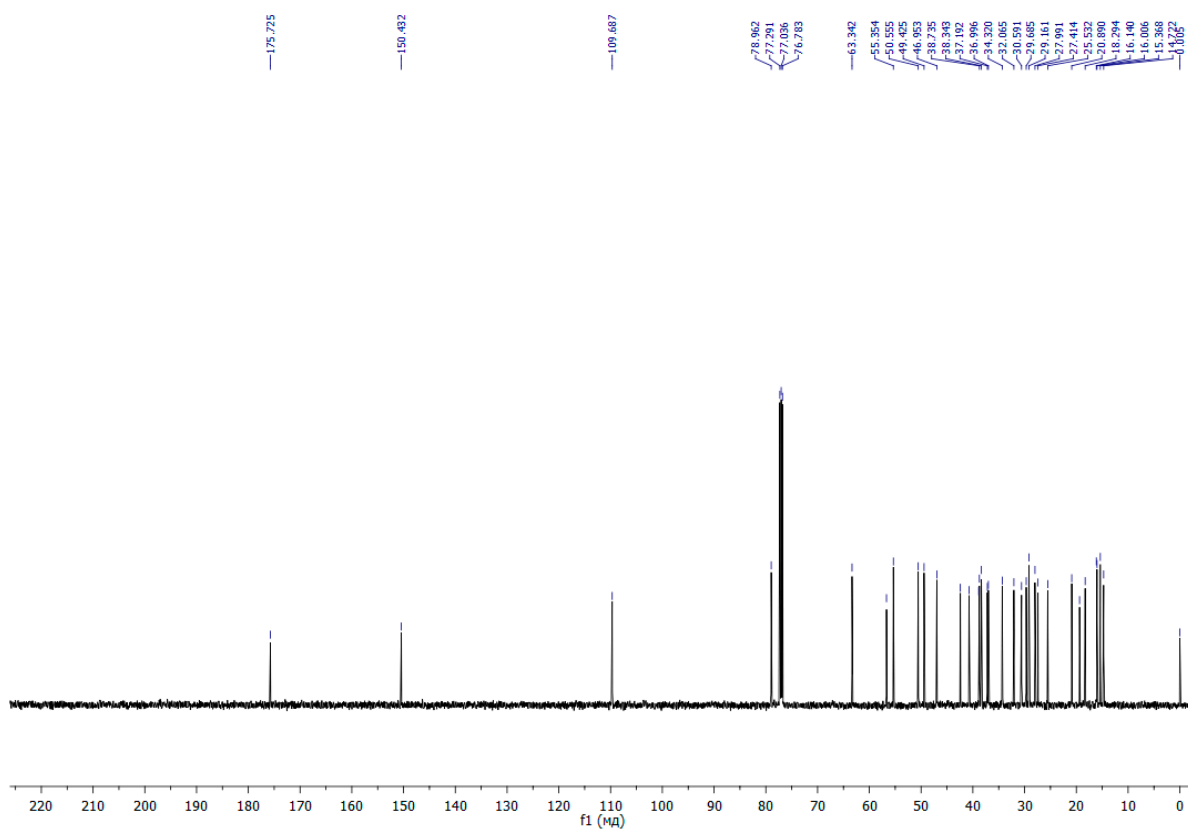

**Figure S22.**  $^1\text{H}$  NMR Spectrum of compound **8a** (500 MHz,  $\text{CDCl}_3$ )

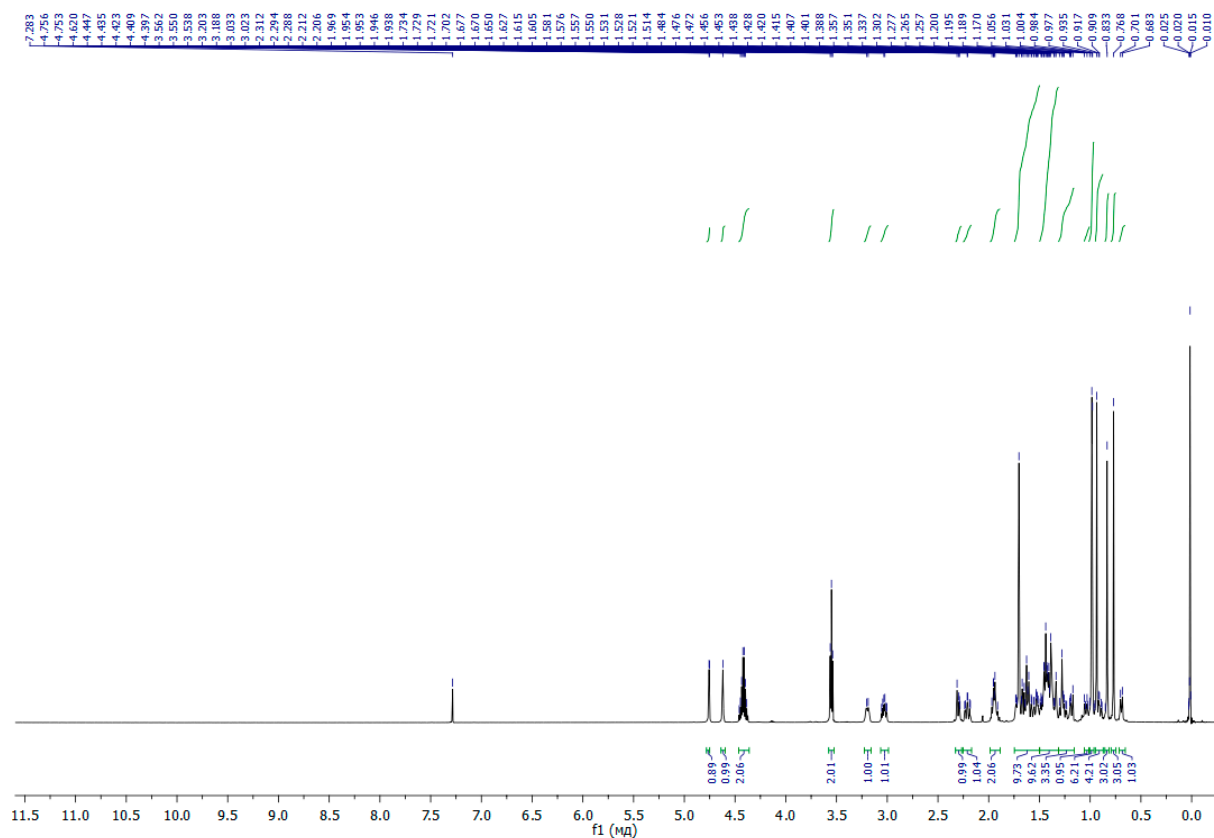



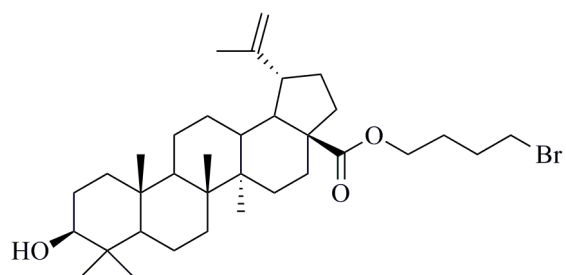

**Figure S23.**  $^{13}\text{C}$  NMR Spectrum of compound **8b** (100 MHz,  $\text{CDCl}_3$ )

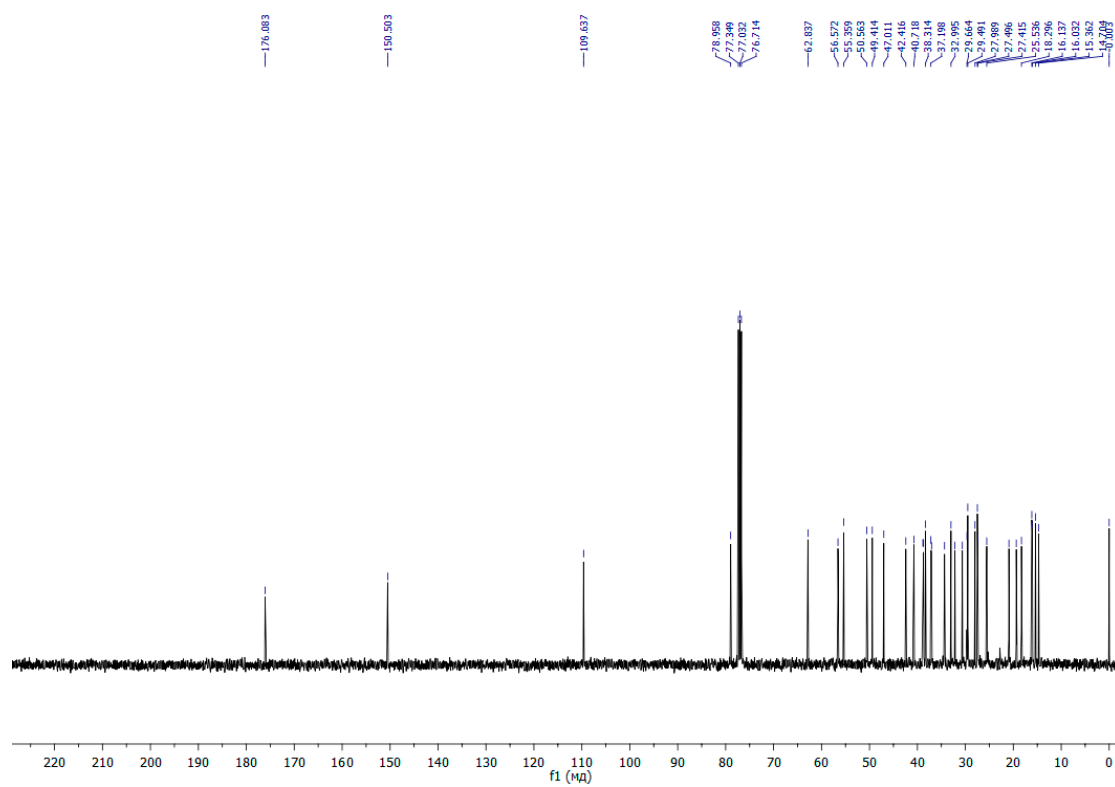

**Figure S24.**  $^1\text{H}$  NMR Spectrum of compound **8b** (400 MHz,  $\text{CDCl}_3$ )

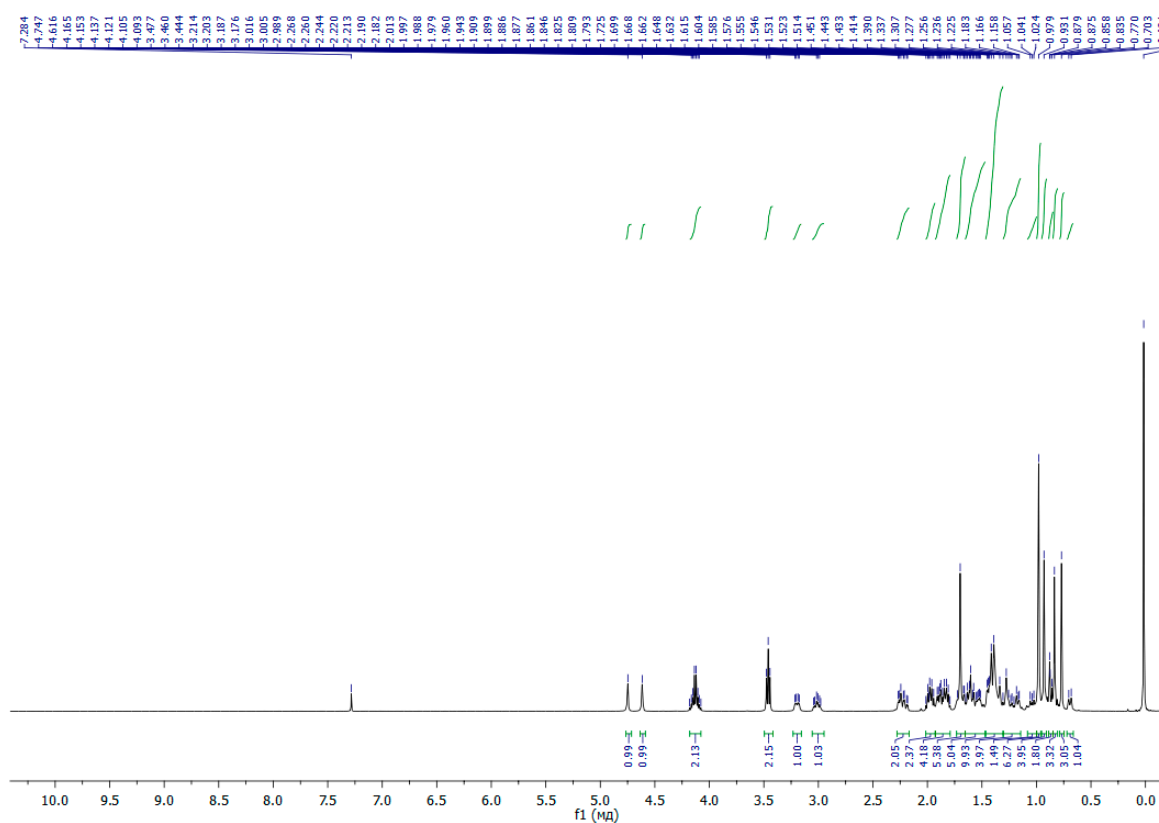

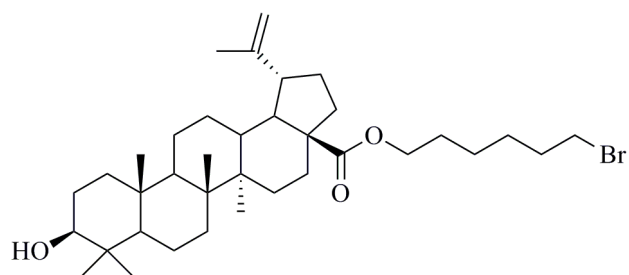

**Figure S25.**  $^{13}\text{C}$  NMR Spectrum of compound **8c** (125 MHz,  $\text{CDCl}_3$ )

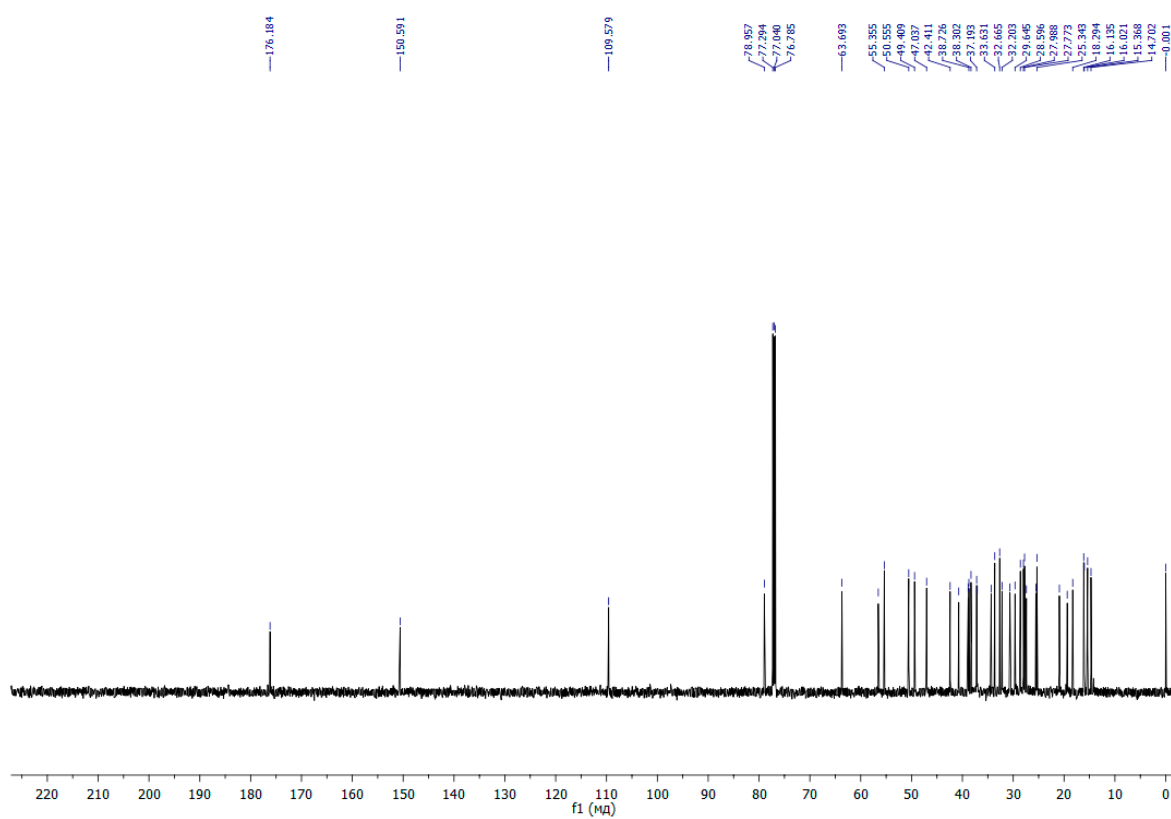

**Figure S26.**  $^1\text{H}$  NMR Spectrum of compound **8c** (500 MHz,  $\text{CDCl}_3$ )

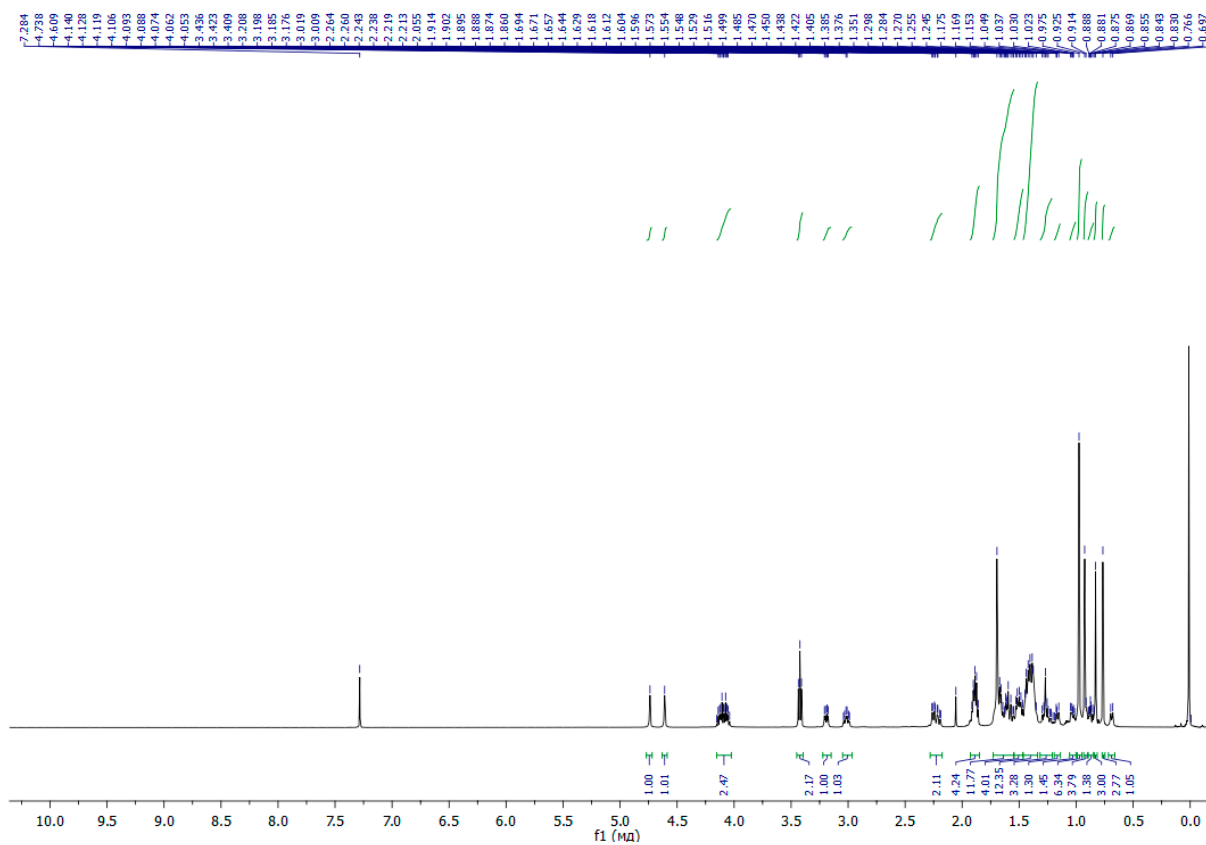

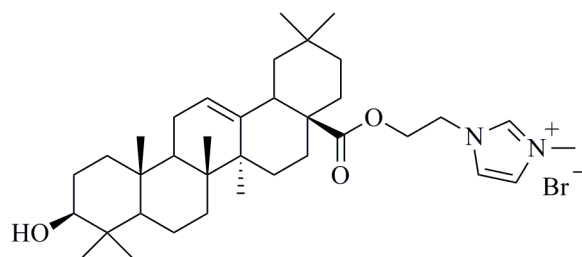

**Figure S27.** <sup>13</sup>C NMR Spectrum of compound **9a** (100 MHz, DMSO-d<sub>6</sub>)

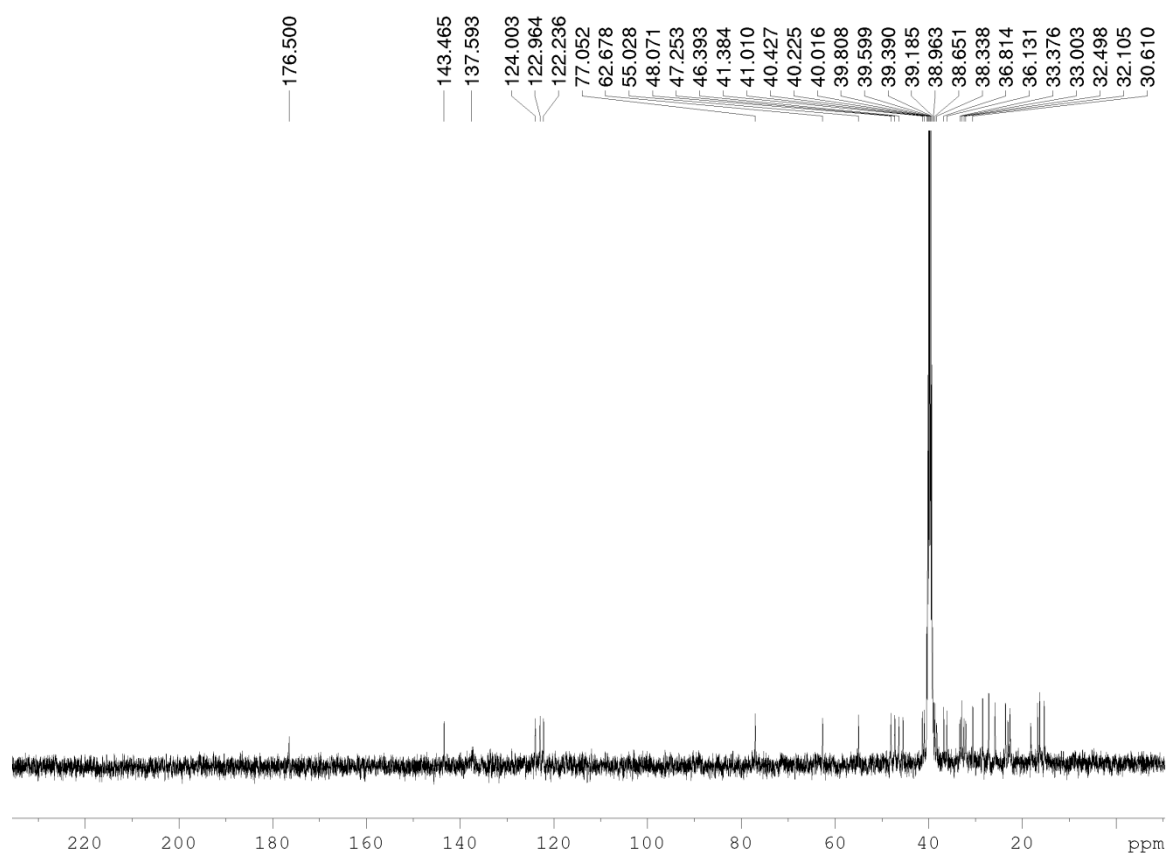

**Figure S28.**  $^1\text{H}$  NMR Spectrum of compound **9a** (400 MHz,  $\text{DMSO-d}_6$ )

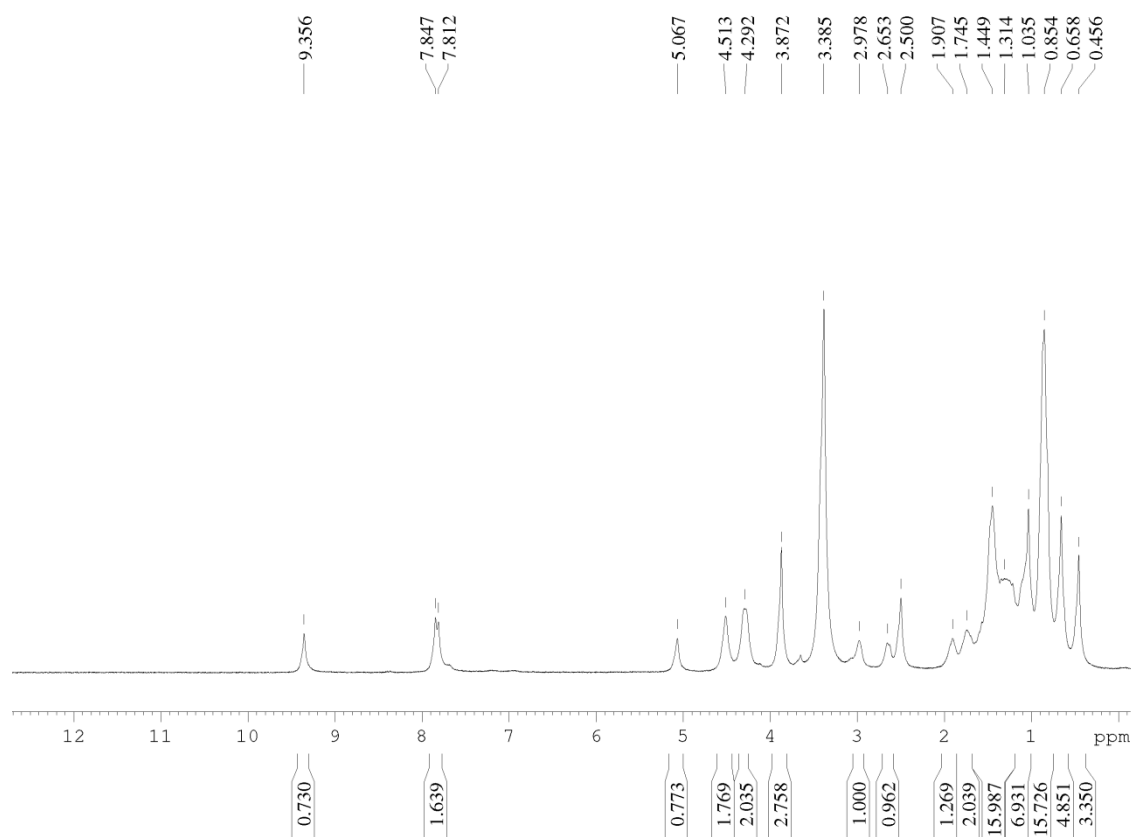

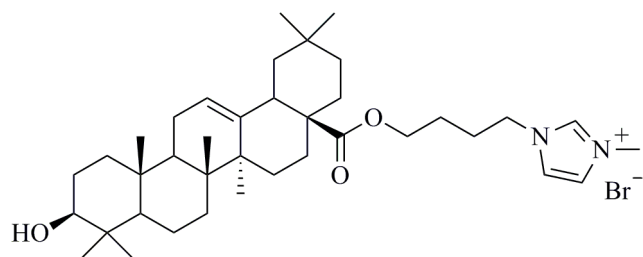

**Figure S29.**  $^{13}\text{C}$  NMR Spectrum of compound **9b** (125 MHz,  $\text{DMSO-d}_6$ )

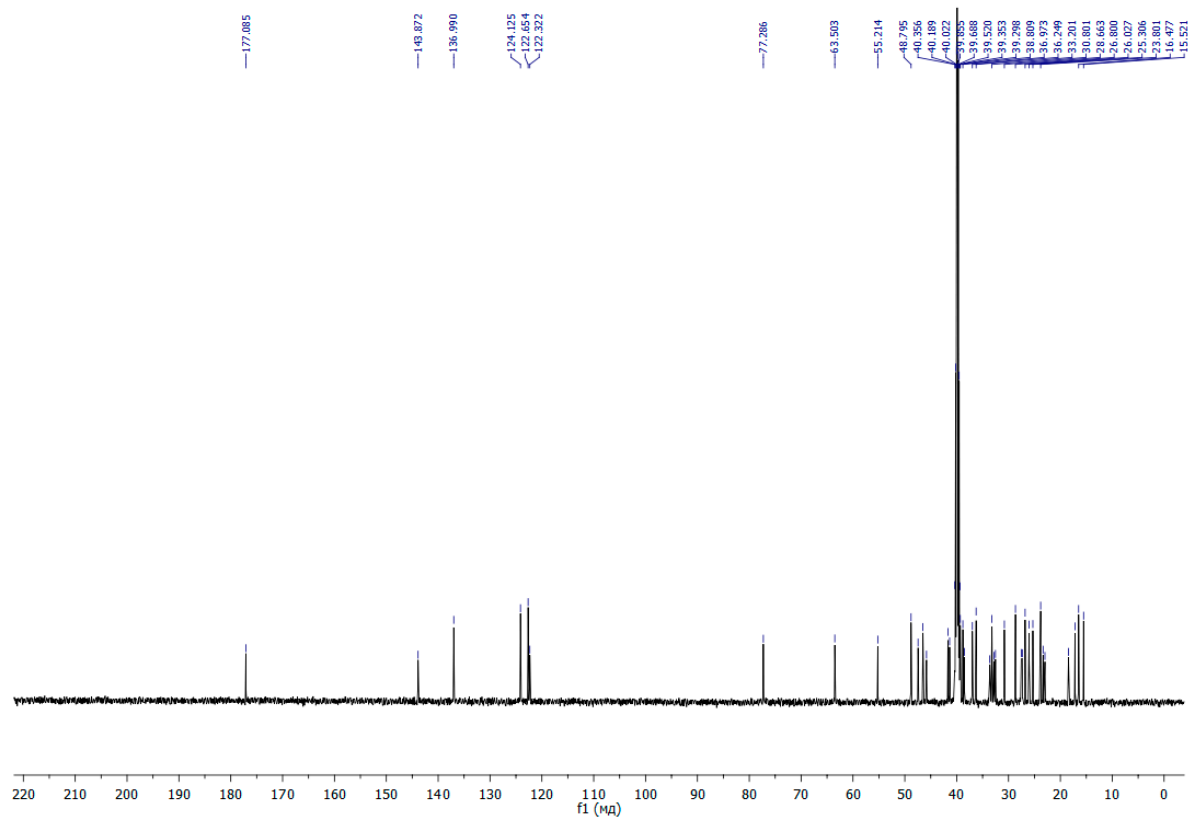

**Figure S30.**  $^1\text{H}$  NMR Spectrum of compound **9b** (500 MHz,  $\text{DMSO-d}_6$ )

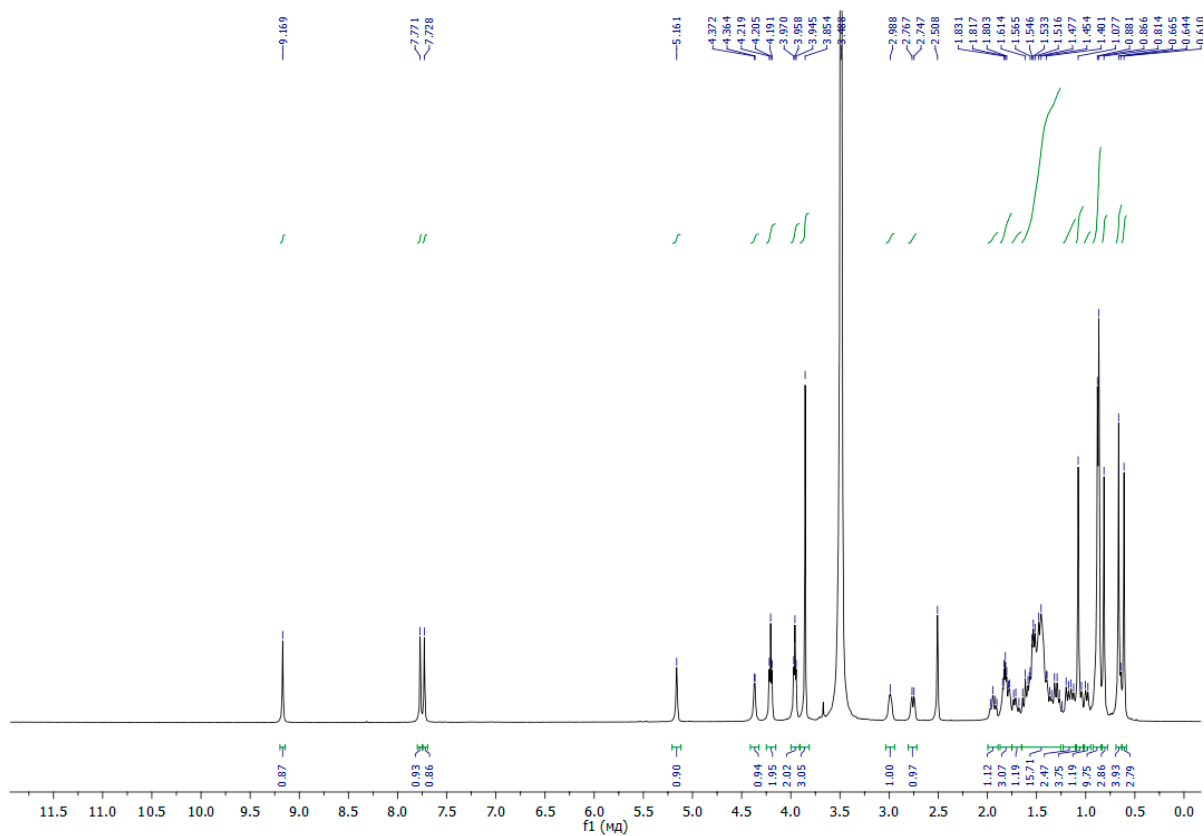



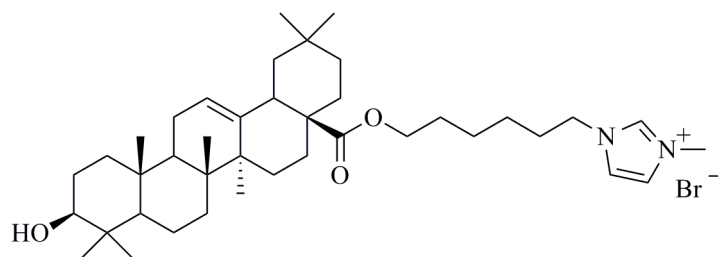

**Figure S31.**  $^{13}\text{C}$  NMR Spectrum of compound **9c** (125 MHz,  $\text{DMSO-d}_6$ )

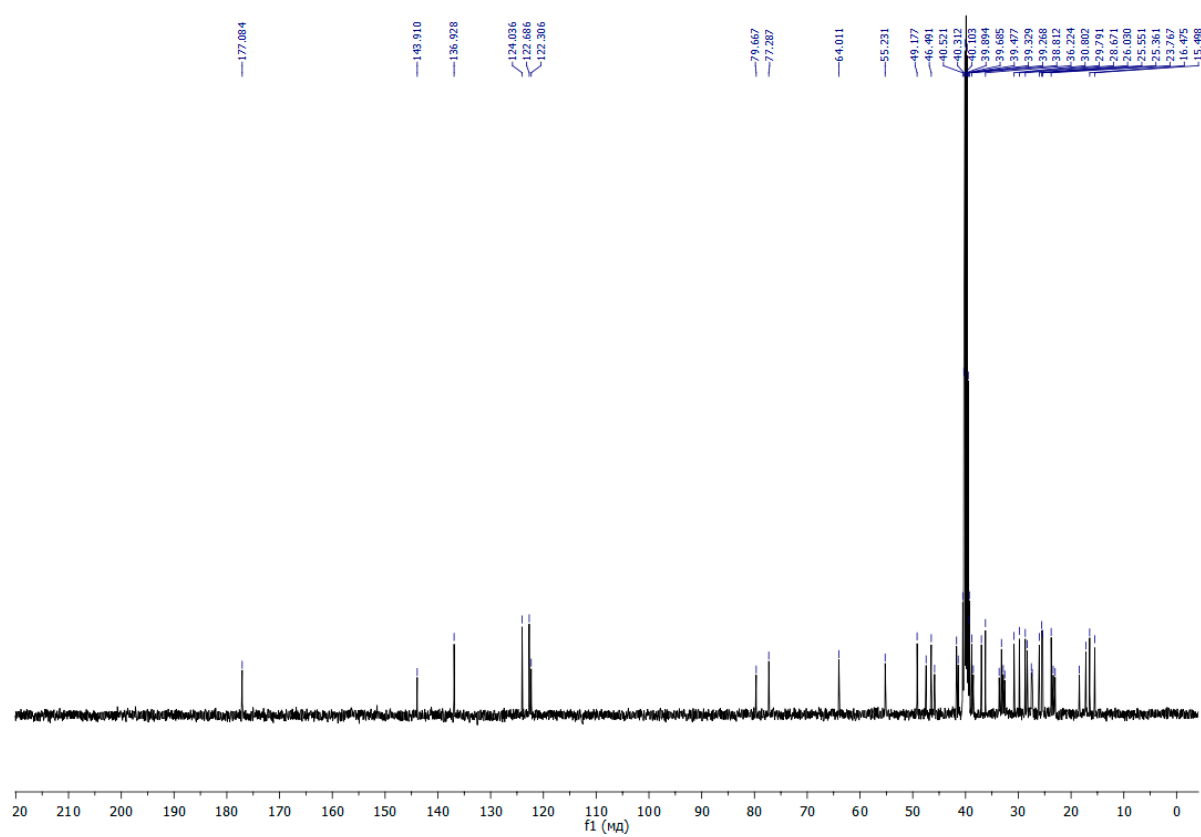

**Figure S32.**  $^1\text{H}$  NMR Spectrum of compound **9c** (500 MHz,  $\text{DMSO-d}_6$ )

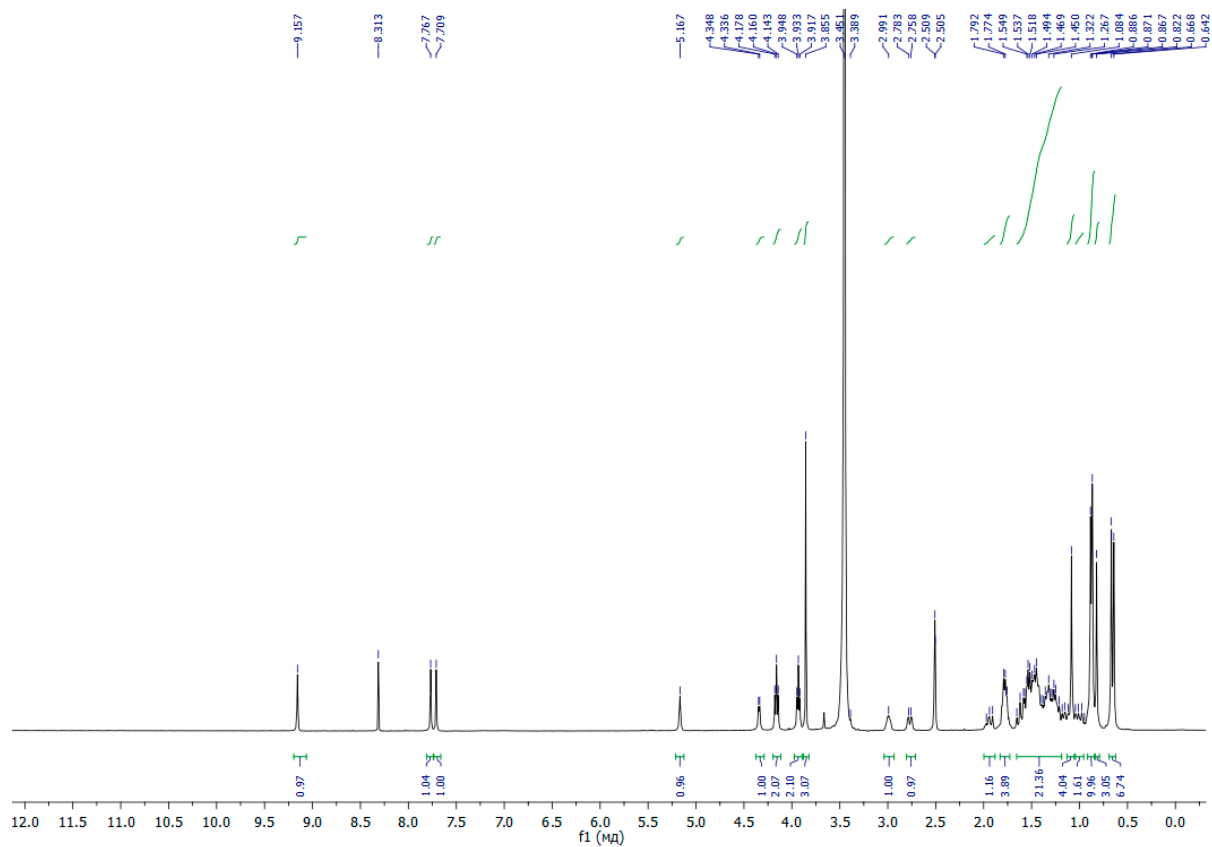

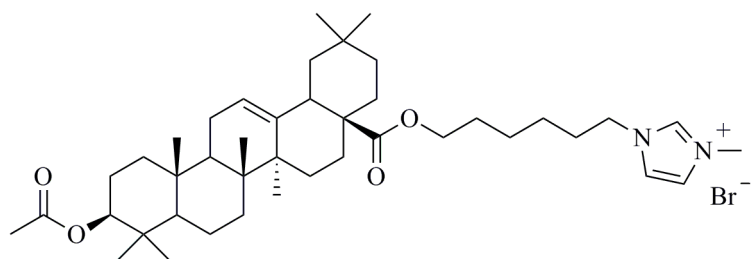

**Figure S33.**  $^{13}\text{C}$  NMR Spectrum of compound **9d** (100 MHz,  $\text{DMSO-d}_6$ )

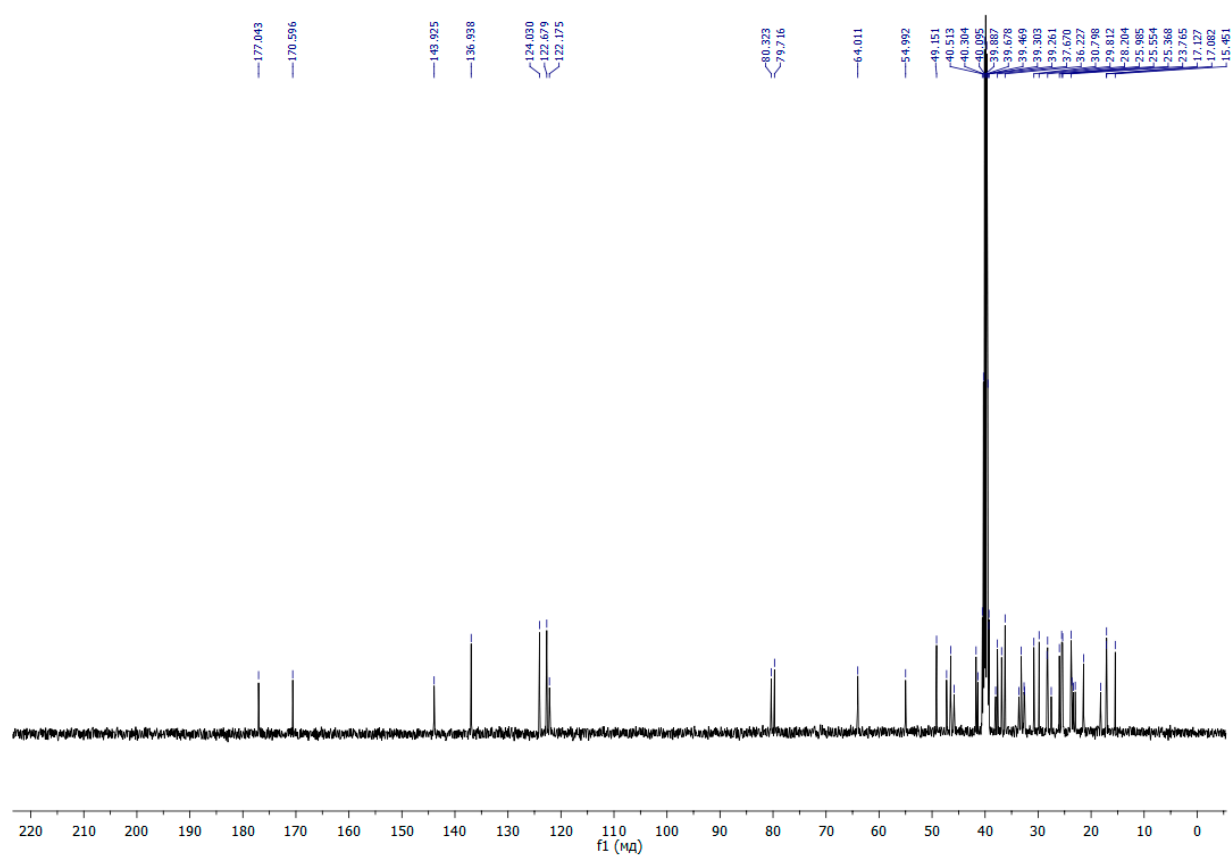

**Figure S34.**  $^1\text{H}$  NMR Spectrum of compound **9d** (400 MHz,  $\text{DMSO-d}_6$ )

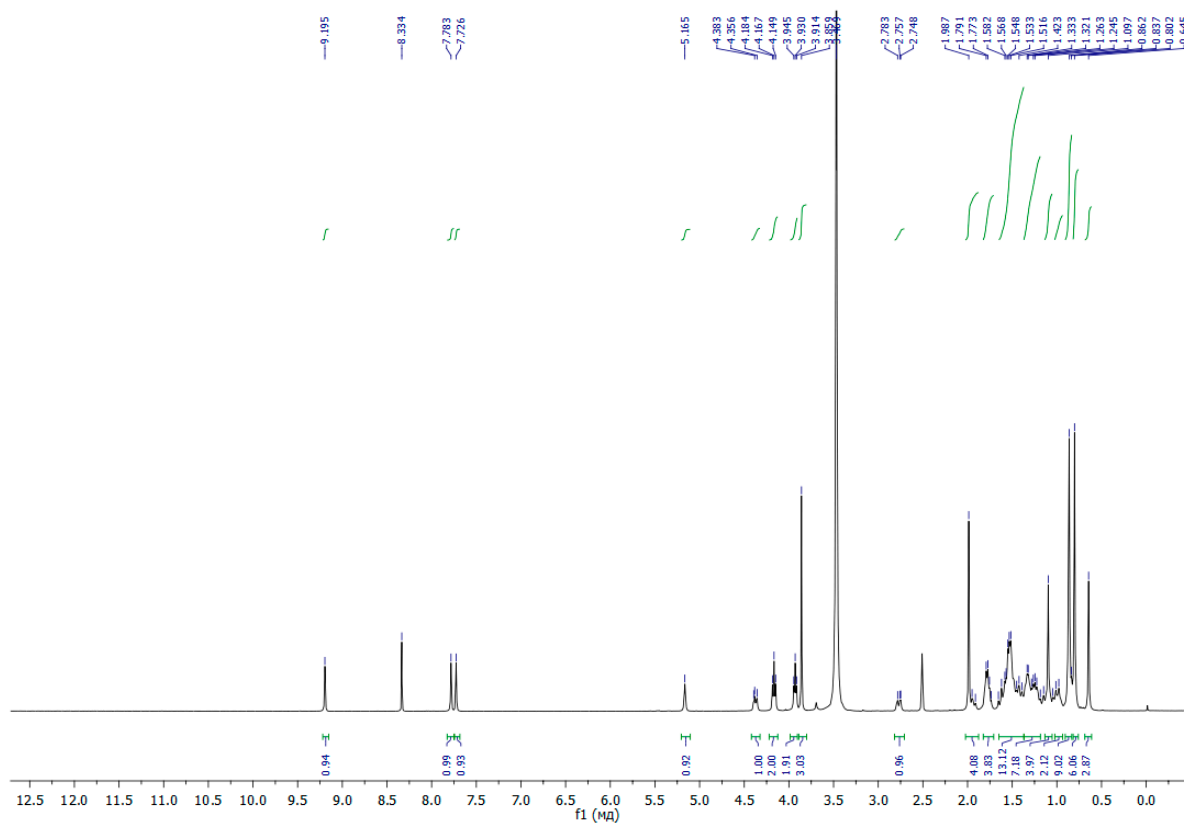

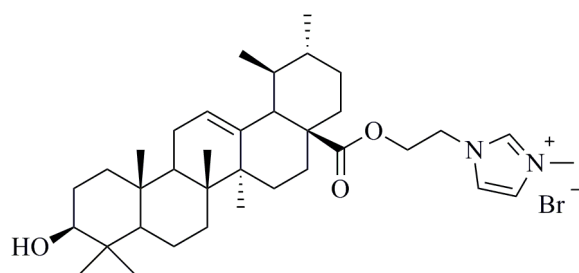

**Figure S35.**  $^{13}\text{C}$  NMR Spectrum of compound **10a** (100 MHz,  $\text{DMSO-d}_6$ )

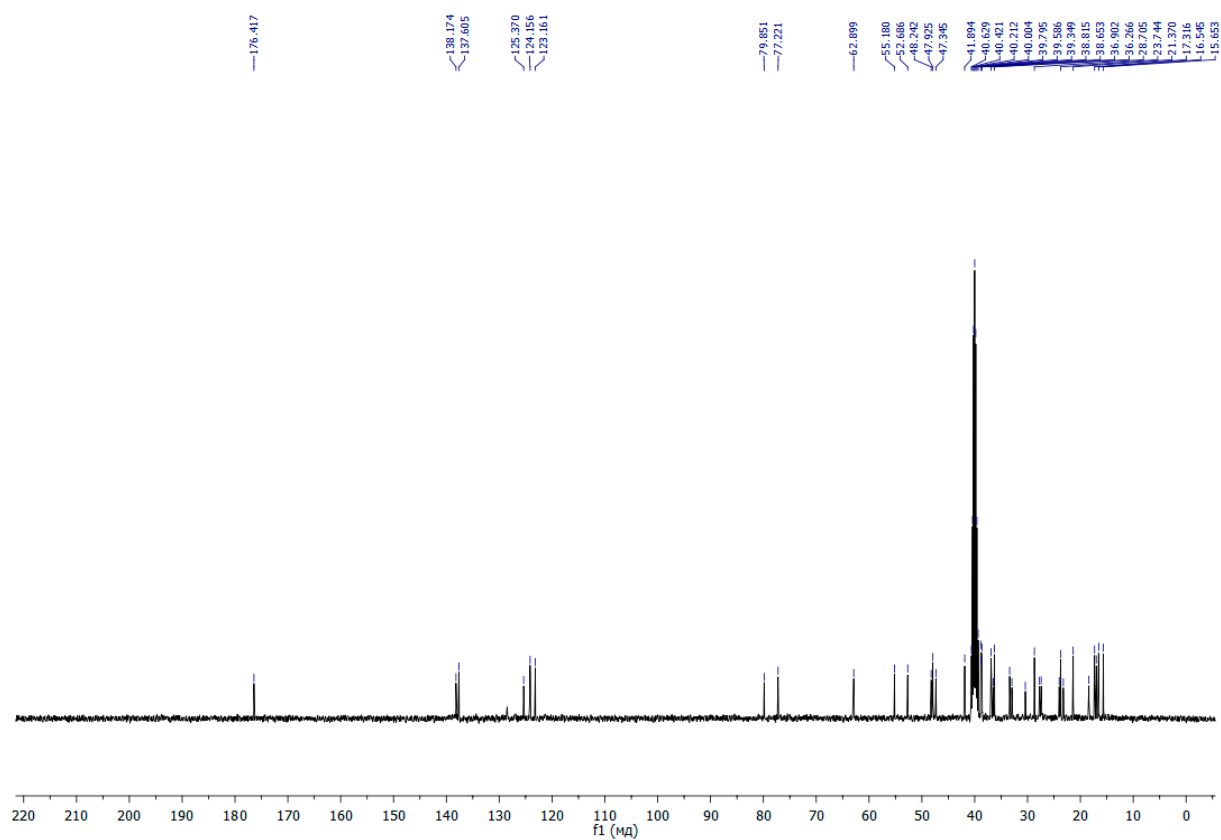

**Figure S36.**  $^1\text{H}$  NMR Spectrum of compound **10a** (400 MHz,  $\text{DMSO-d}_6$ )

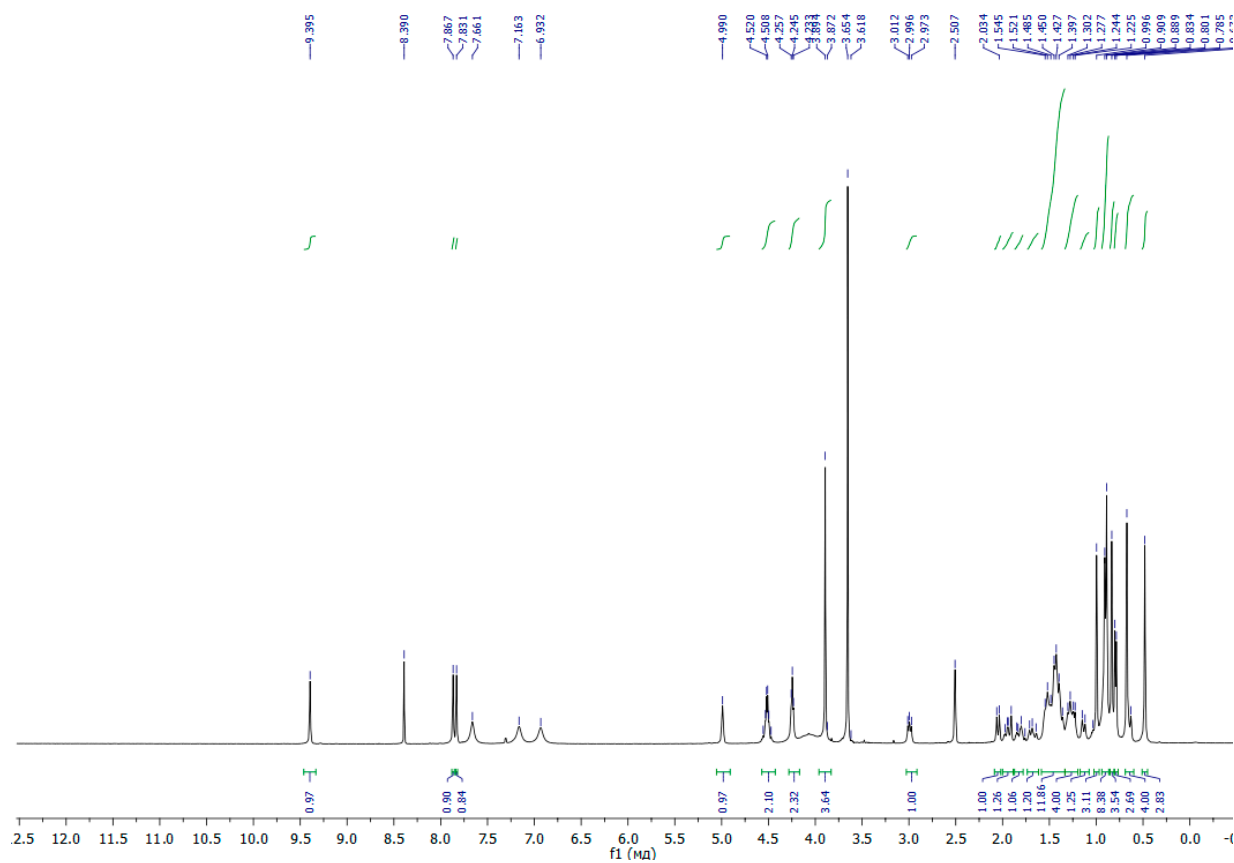

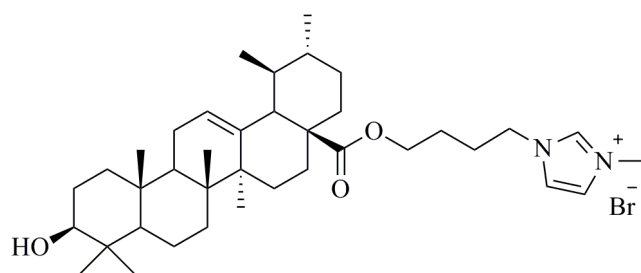

**Figure S37.**  $^{13}\text{C}$  NMR Spectrum of compound **10b** (100 MHz,  $\text{DMSO-d}_6$ )

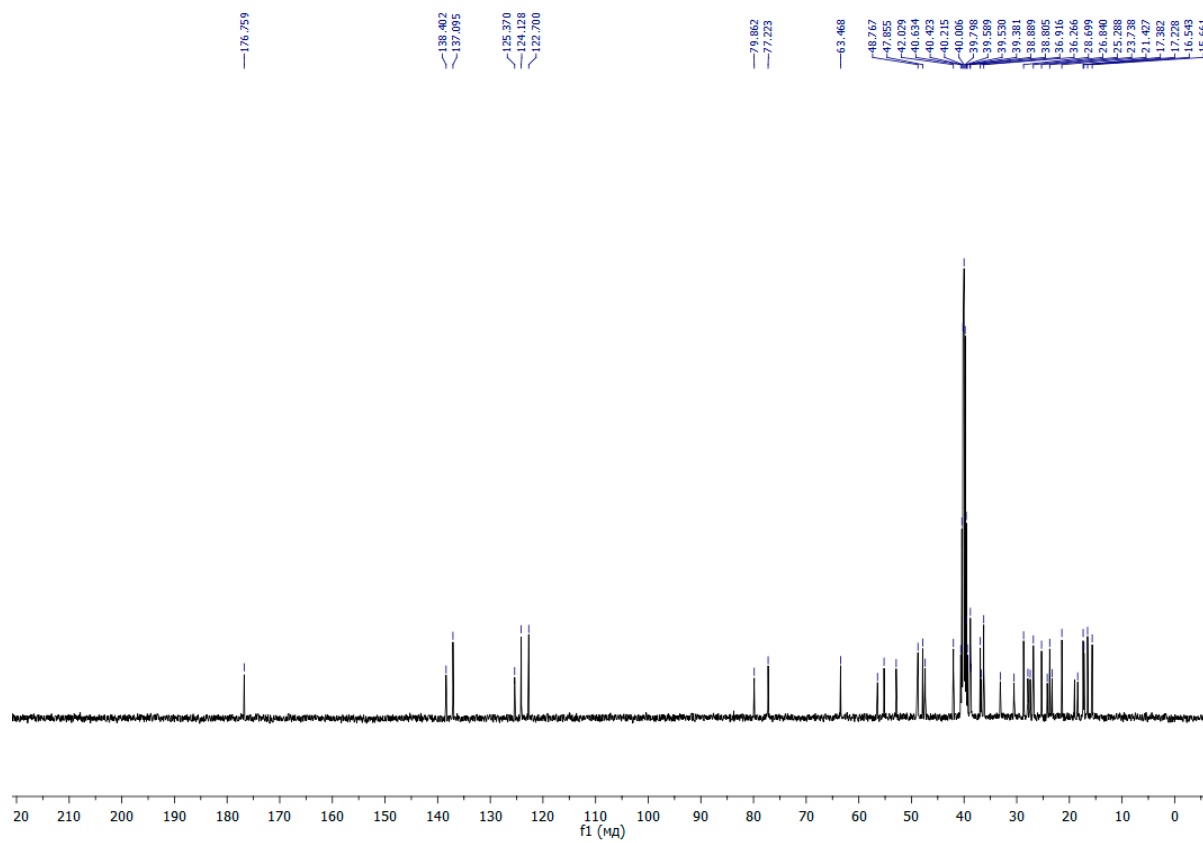

**Figure S38.**  $^1\text{H}$  NMR Spectrum of compound **10b** (400 MHz,  $\text{DMSO-d}_6$ )

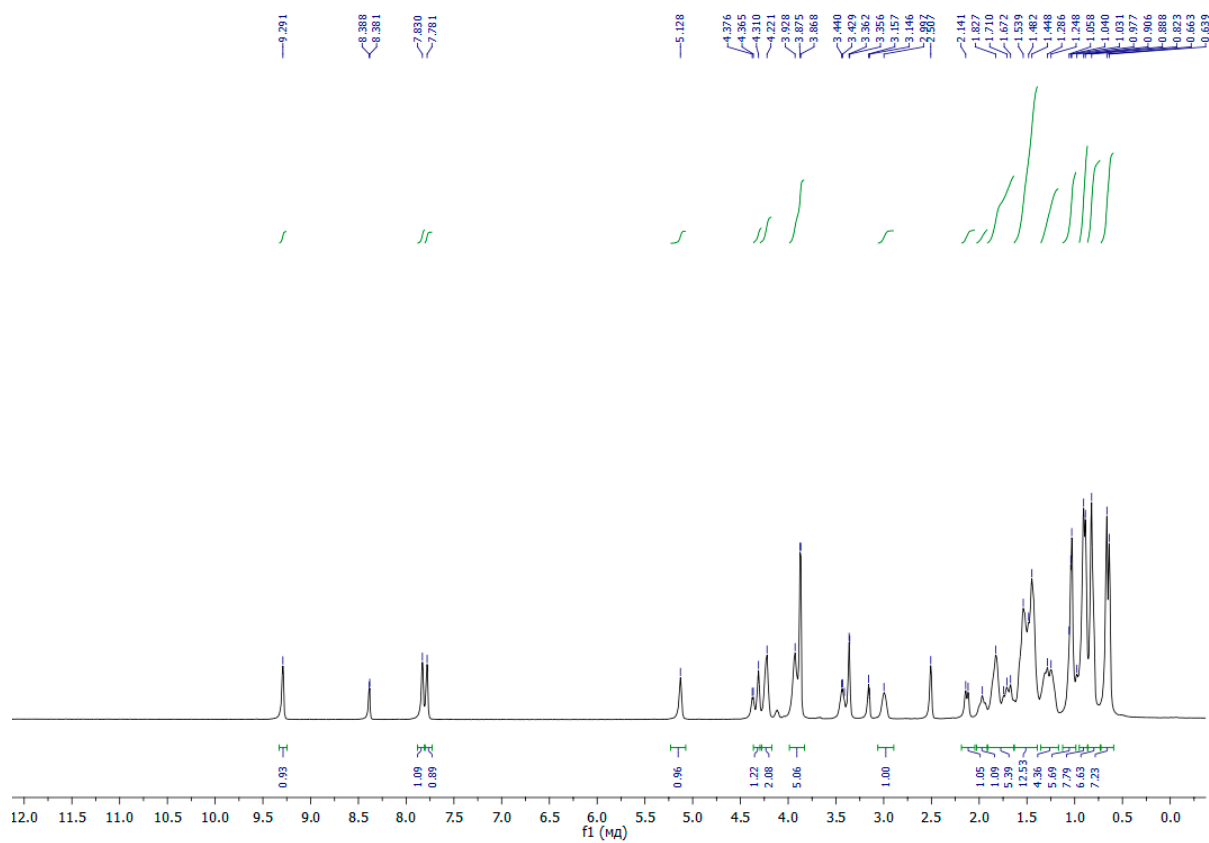



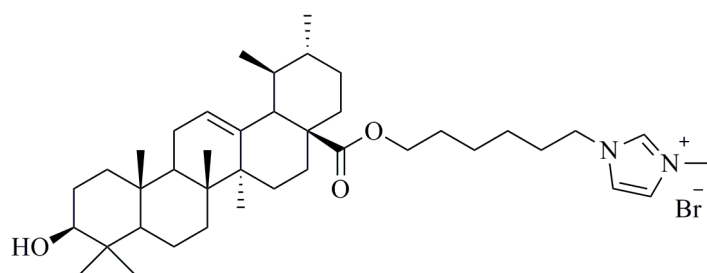

**Figure S39.**  $^{13}\text{C}$  NMR Spectrum of compound **10c** (100 MHz,  $\text{DMSO-d}_6$ )

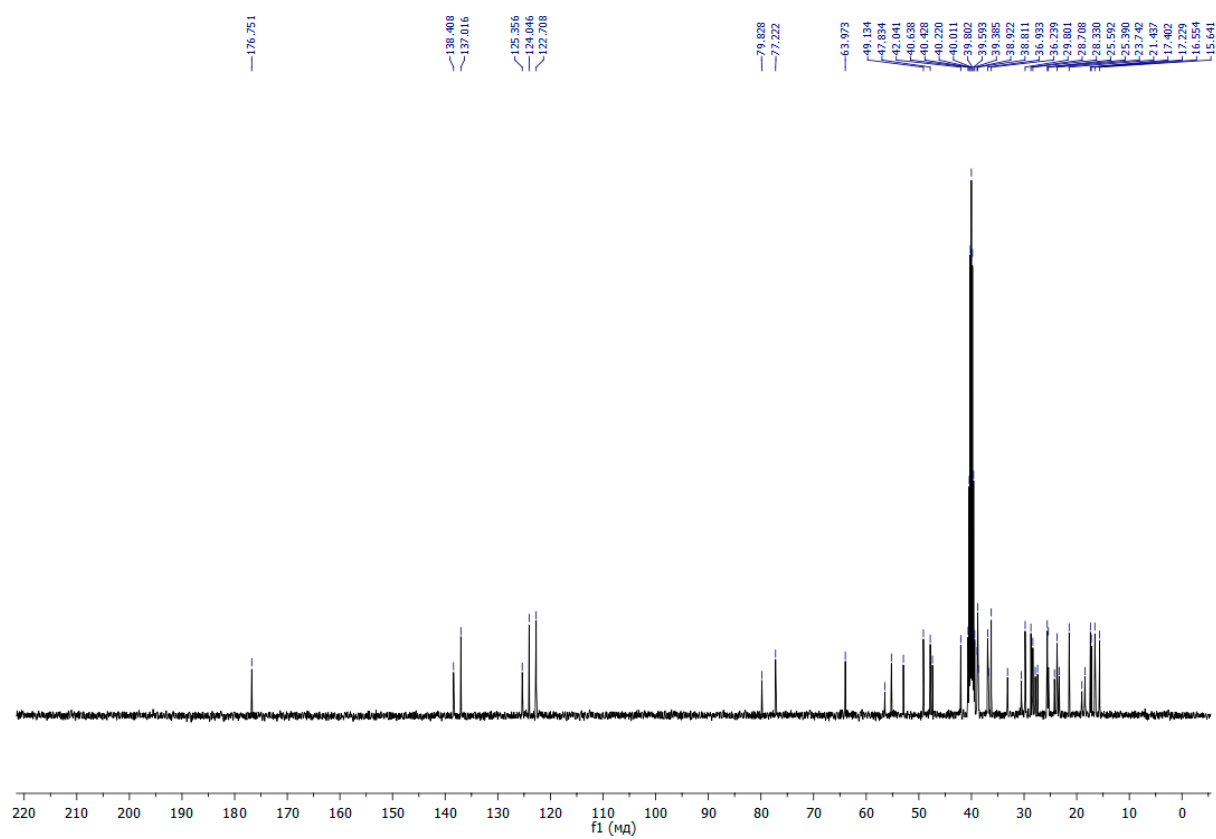

**Figure S40.**  $^1\text{H}$  NMR Spectrum of compound **10c** (400 MHz,  $\text{DMSO-d}_6$ )

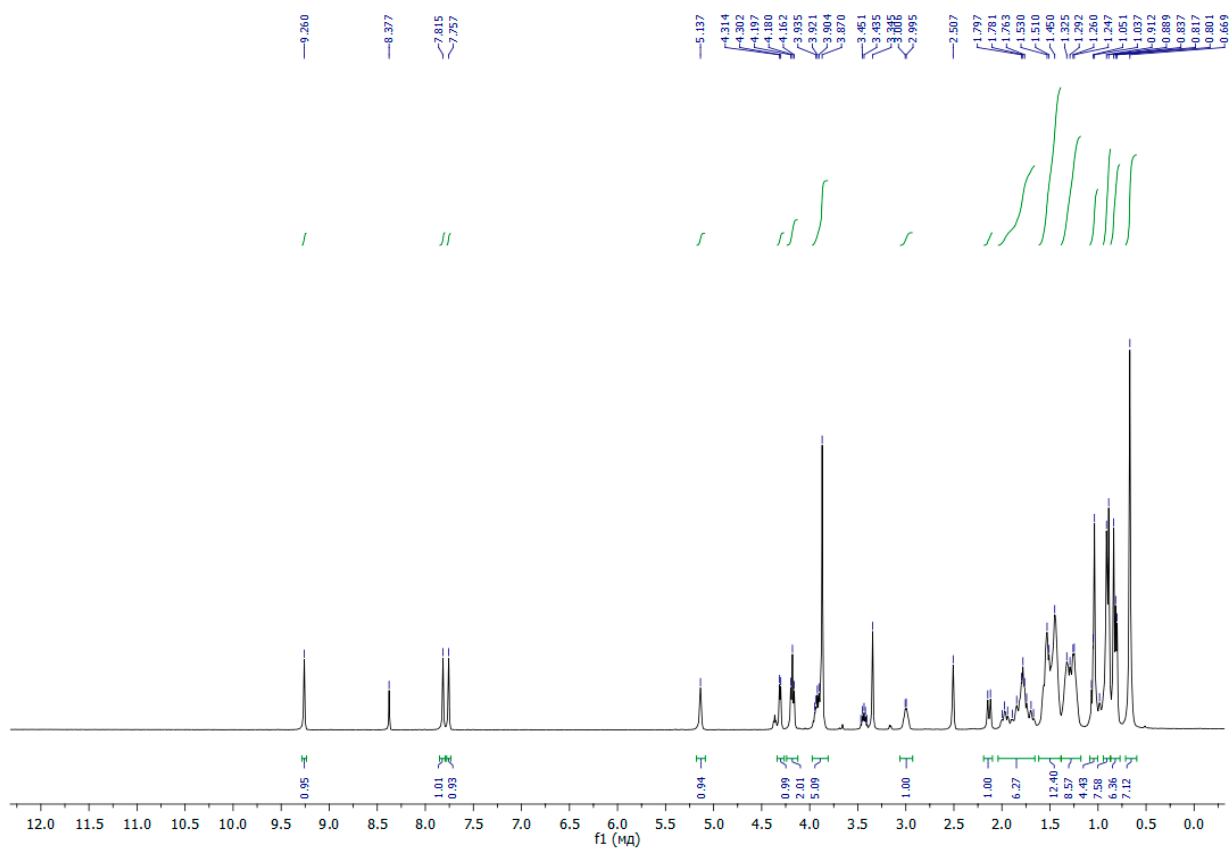

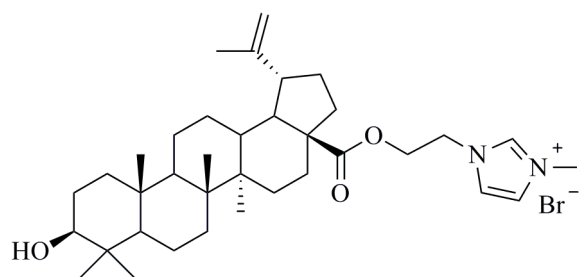

**Figure S41.**  $^{13}\text{C}$  NMR Spectrum of compound **11a** (100 MHz,  $\text{DMSO-d}_6$ )

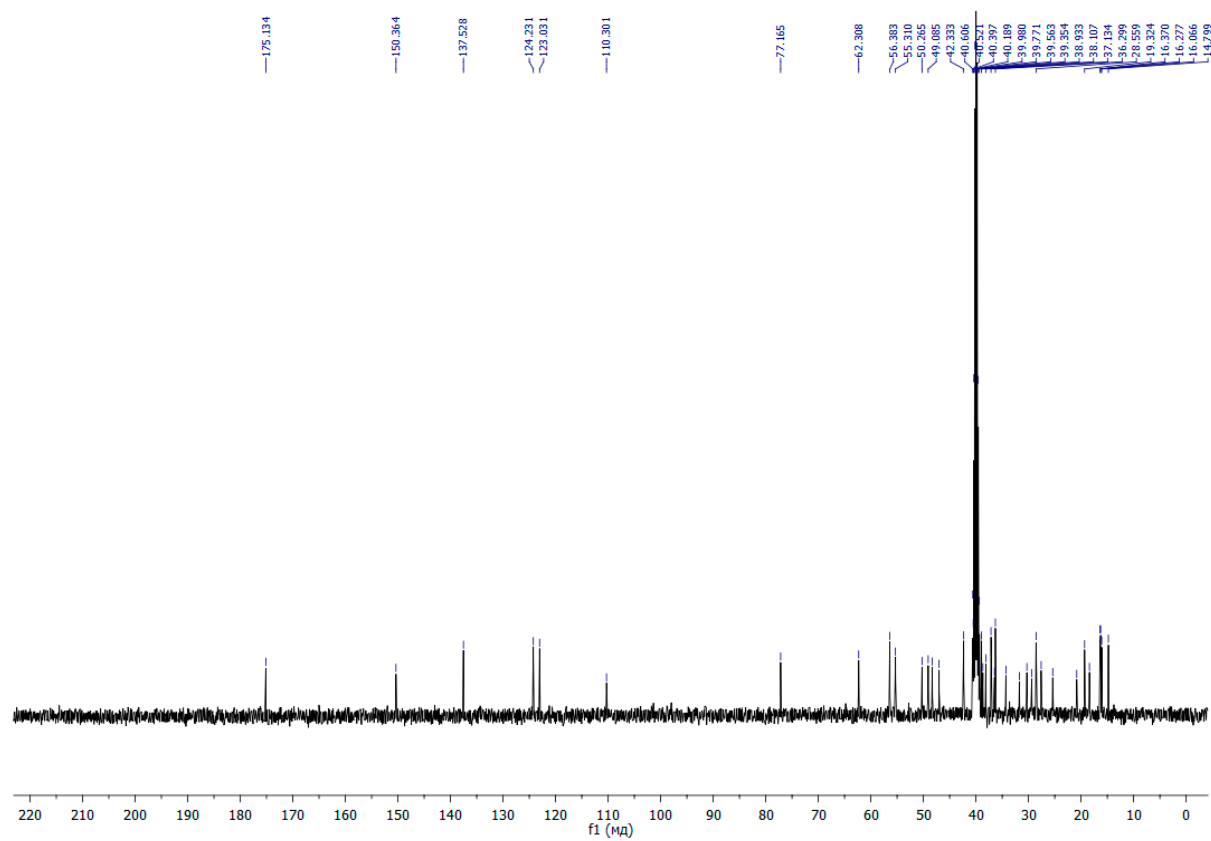

**Figure S42.**  $^1\text{H}$  NMR Spectrum of compound **11a** (400 MHz,  $\text{DMSO-d}_6$ )

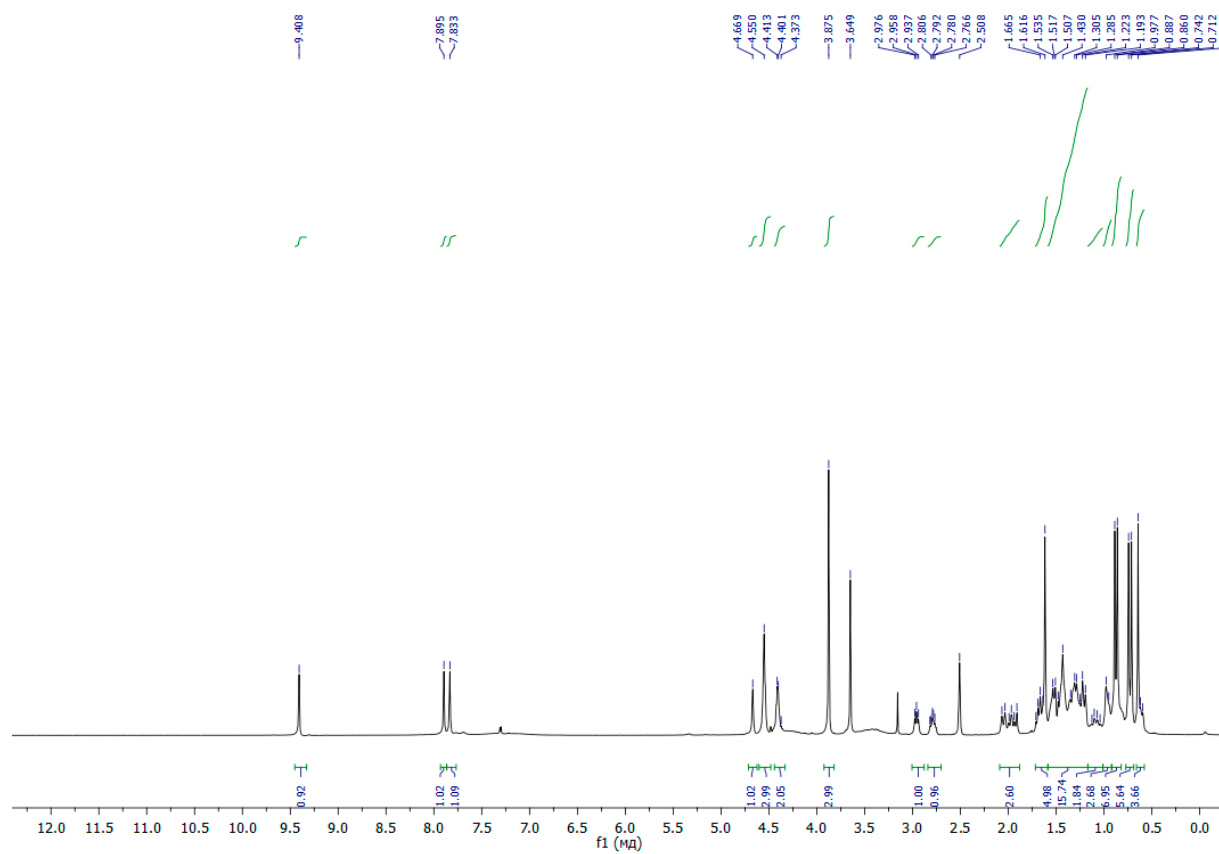

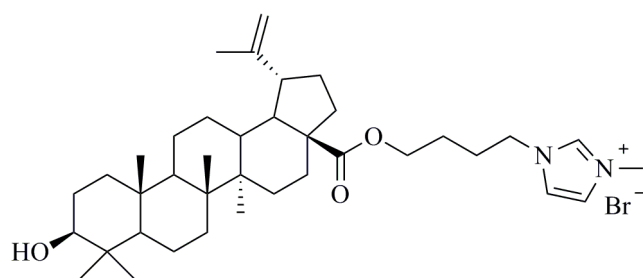

**Figure S43.**  $^{13}\text{C}$  NMR Spectrum of compound **11b** (100 MHz,  $\text{DMSO-d}_6$ )

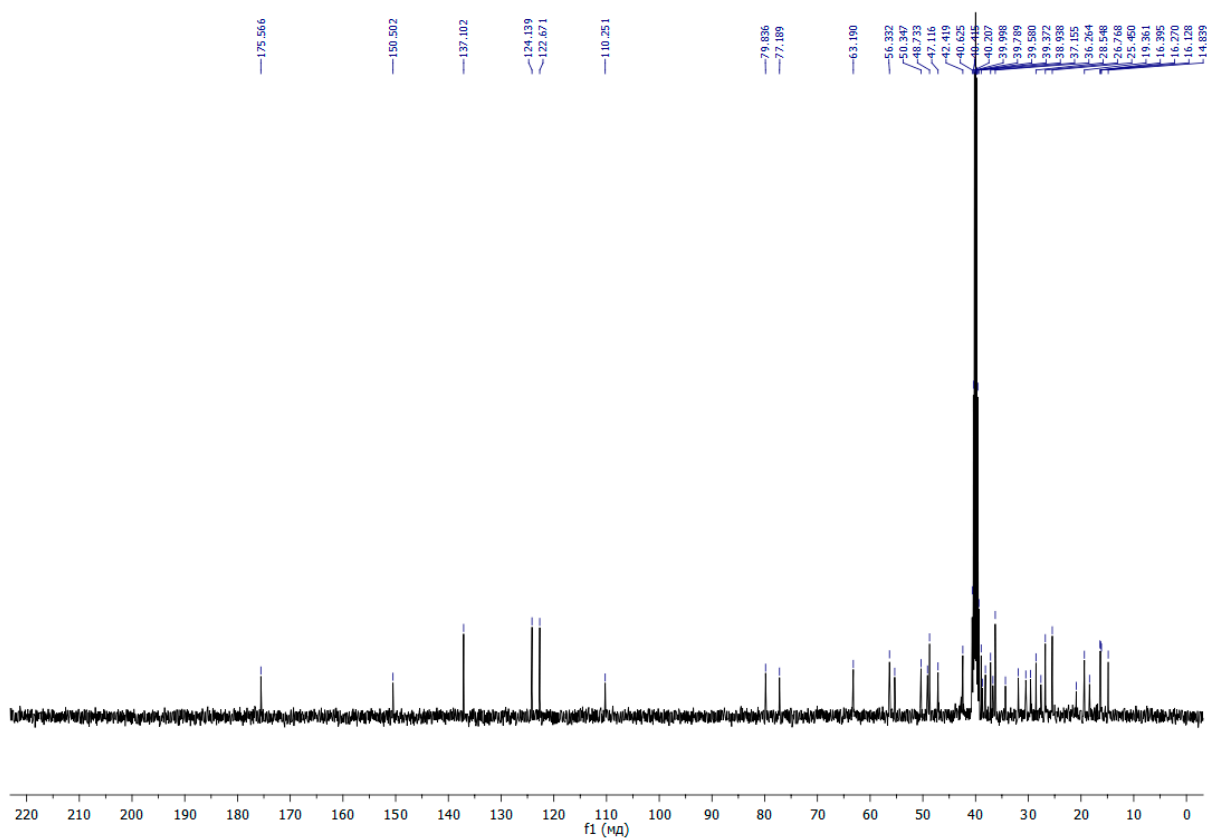

**Figure S44.**  $^1\text{H}$  NMR Spectrum of compound **11b** (400 MHz,  $\text{DMSO-d}_6$ )

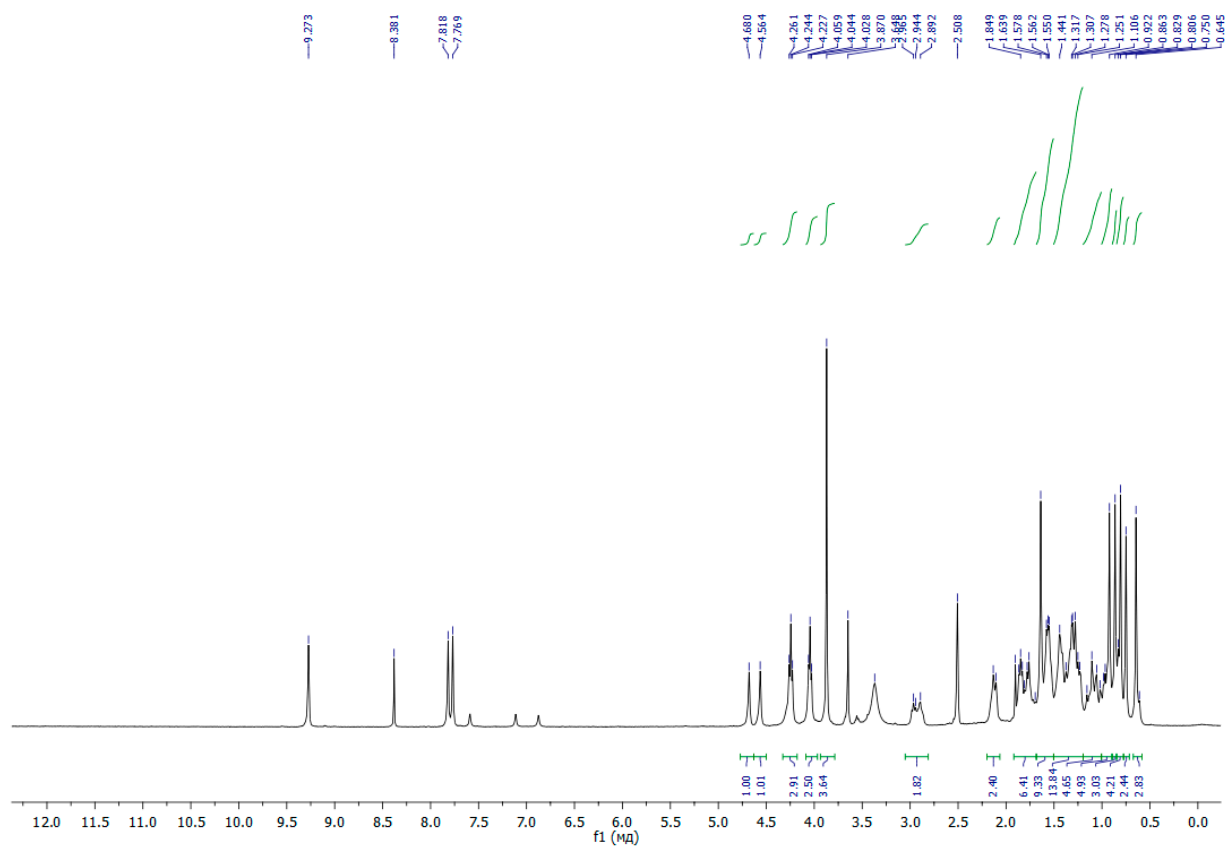

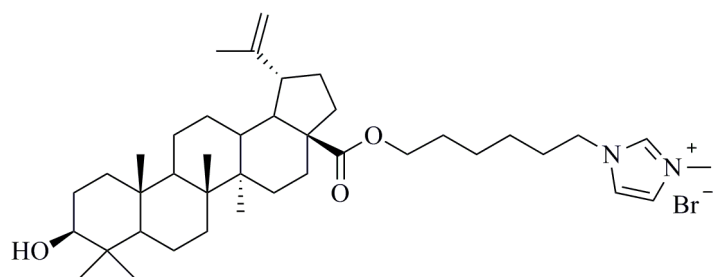

**Figure S45.**  $^{13}\text{C}$  NMR Spectrum of compound **11c** (125 MHz,  $\text{DMSO-d}_6$ )

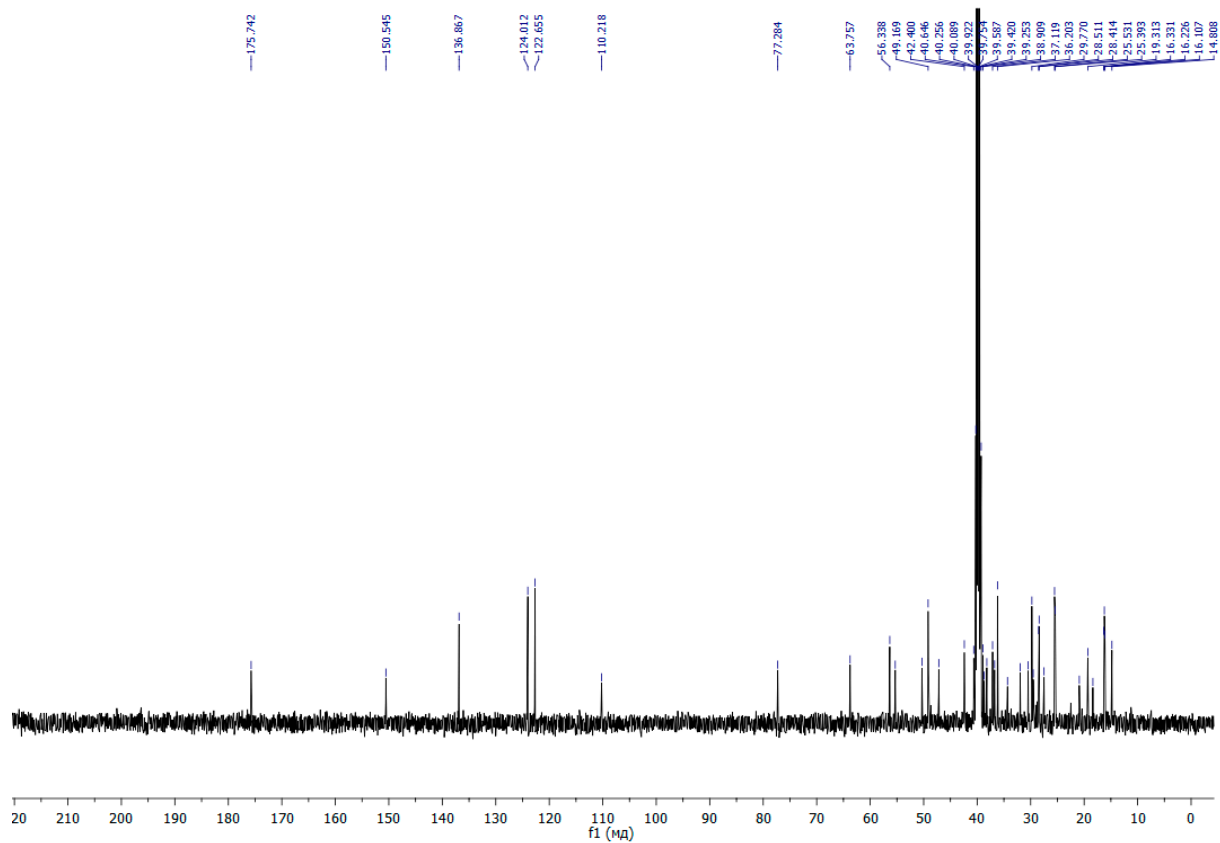

**Figure S46.**  $^1\text{H}$  NMR Spectrum of compound **11c** (500 MHz,  $\text{DMSO-d}_6$ )

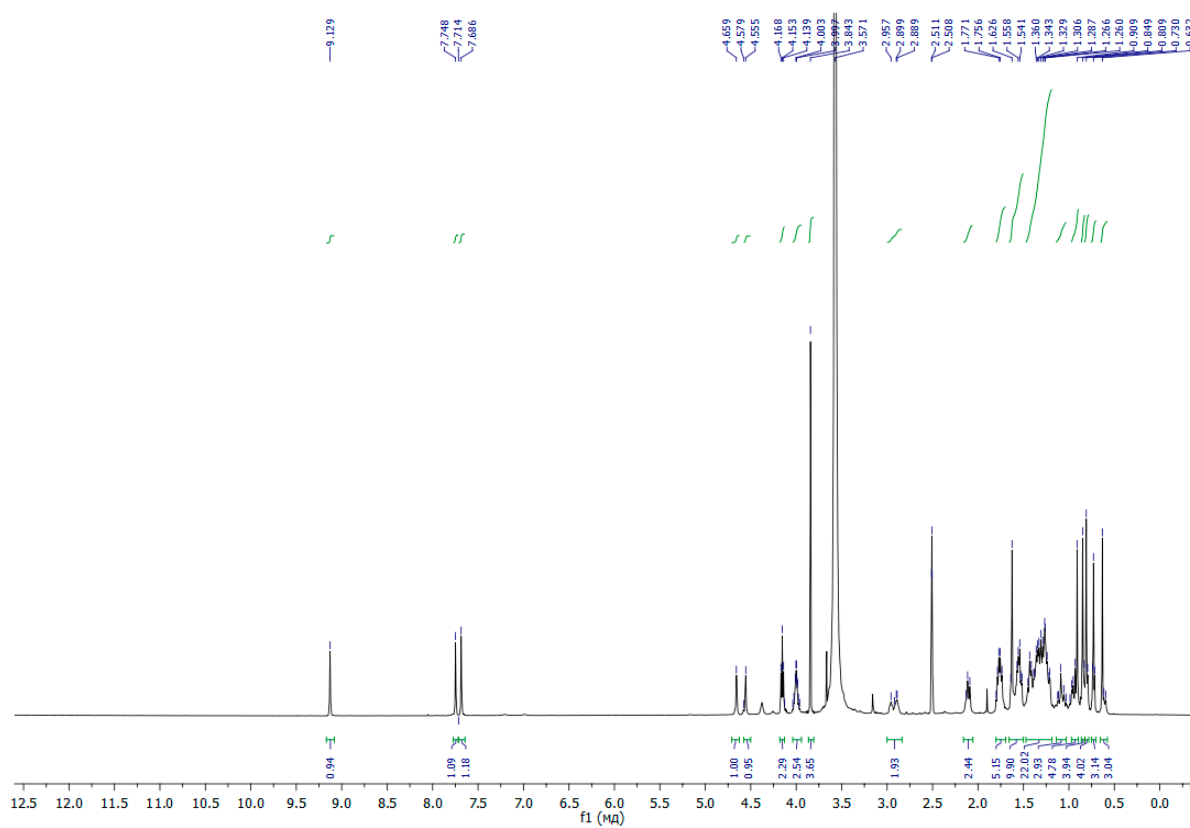



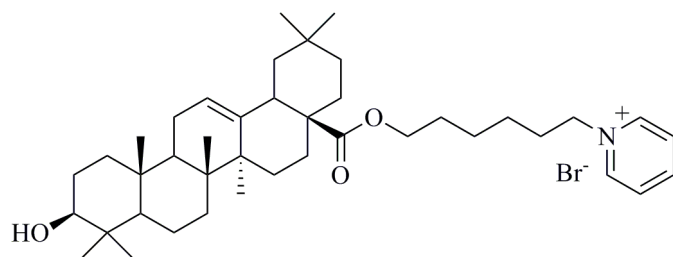

**Figure S47.**  $^{13}\text{C}$  NMR Spectrum of compound **12a** (125 MHz,  $\text{DMSO-d}_6$ )

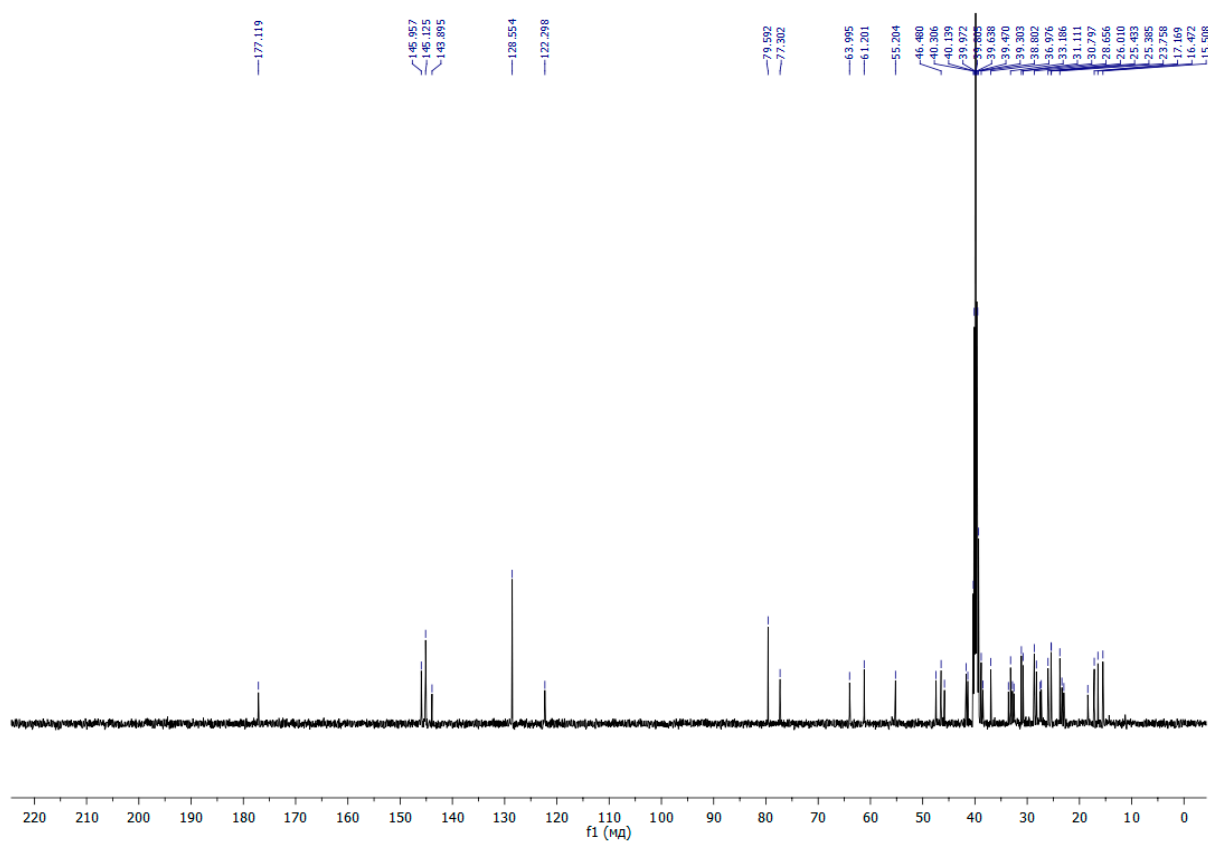

**Figure S48.**  $^1\text{H}$  NMR Spectrum of compound **12a** (500 MHz,  $\text{DMSO-d}_6$ )

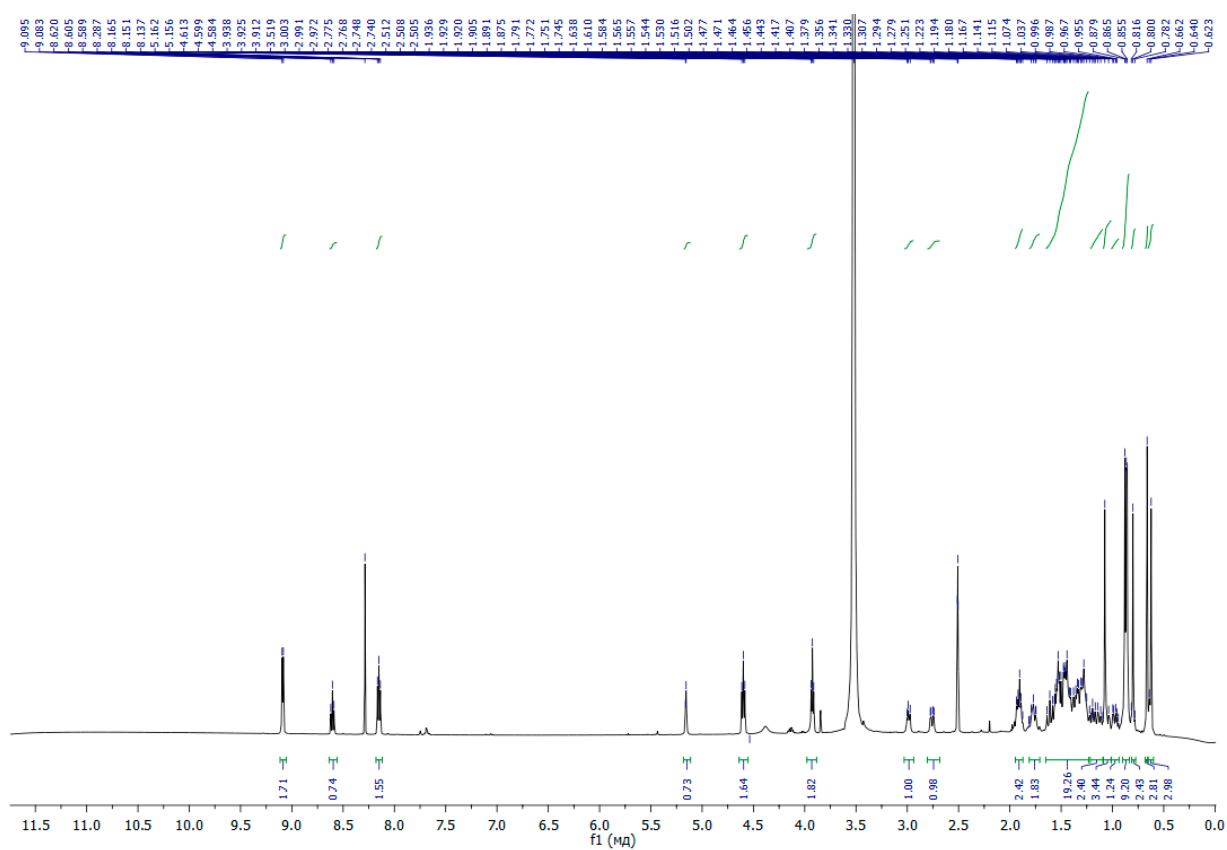

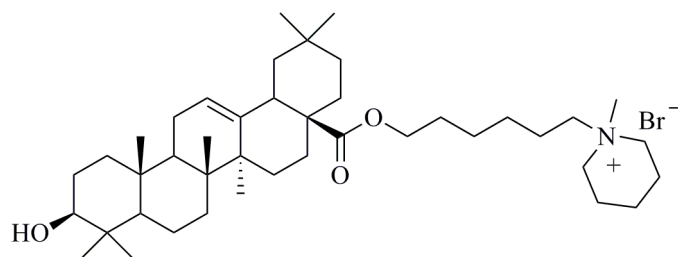

**Figure S49.**  $^{13}\text{C}$  NMR Spectrum of compound **12b** (100 MHz, DMSO- $d_6$ )

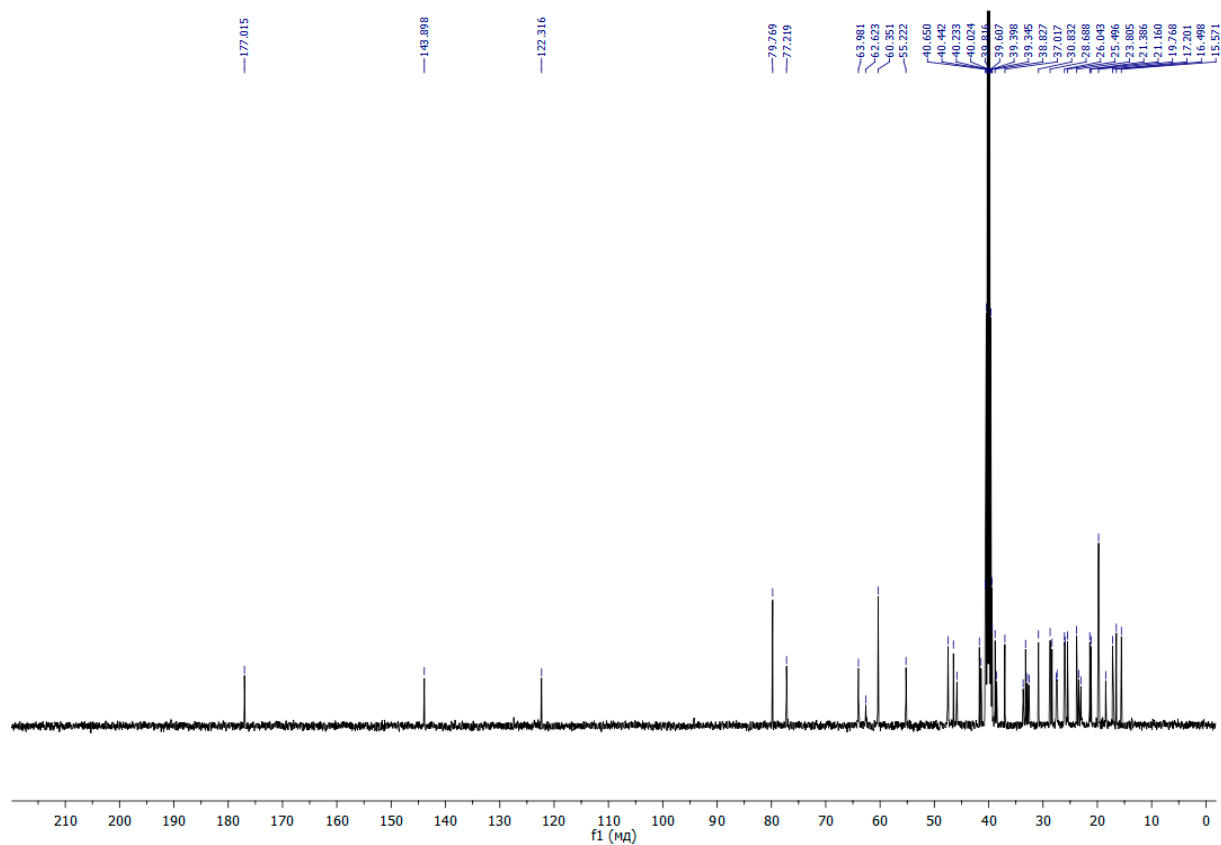

**Figure S50.**  $^1\text{H}$  NMR Spectrum of compound **12b** (500 MHz,  $\text{DMSO-d}_6$ )

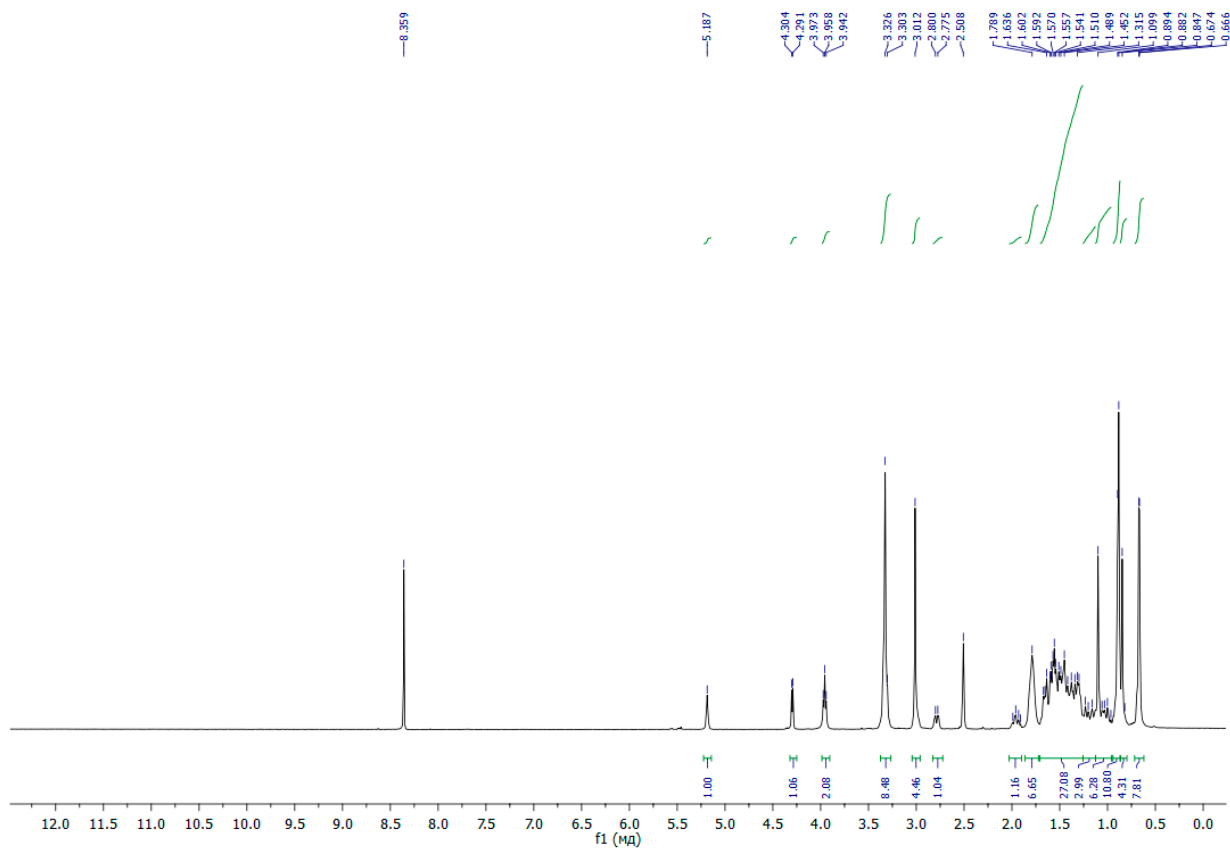

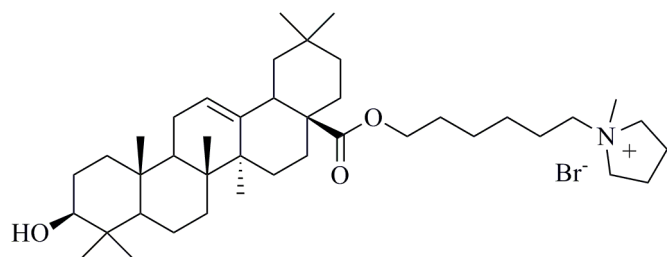

**Figure S51.**  $^{13}\text{C}$  NMR Spectrum of compound **12c** (125 MHz,  $\text{DMSO-d}_6$ )

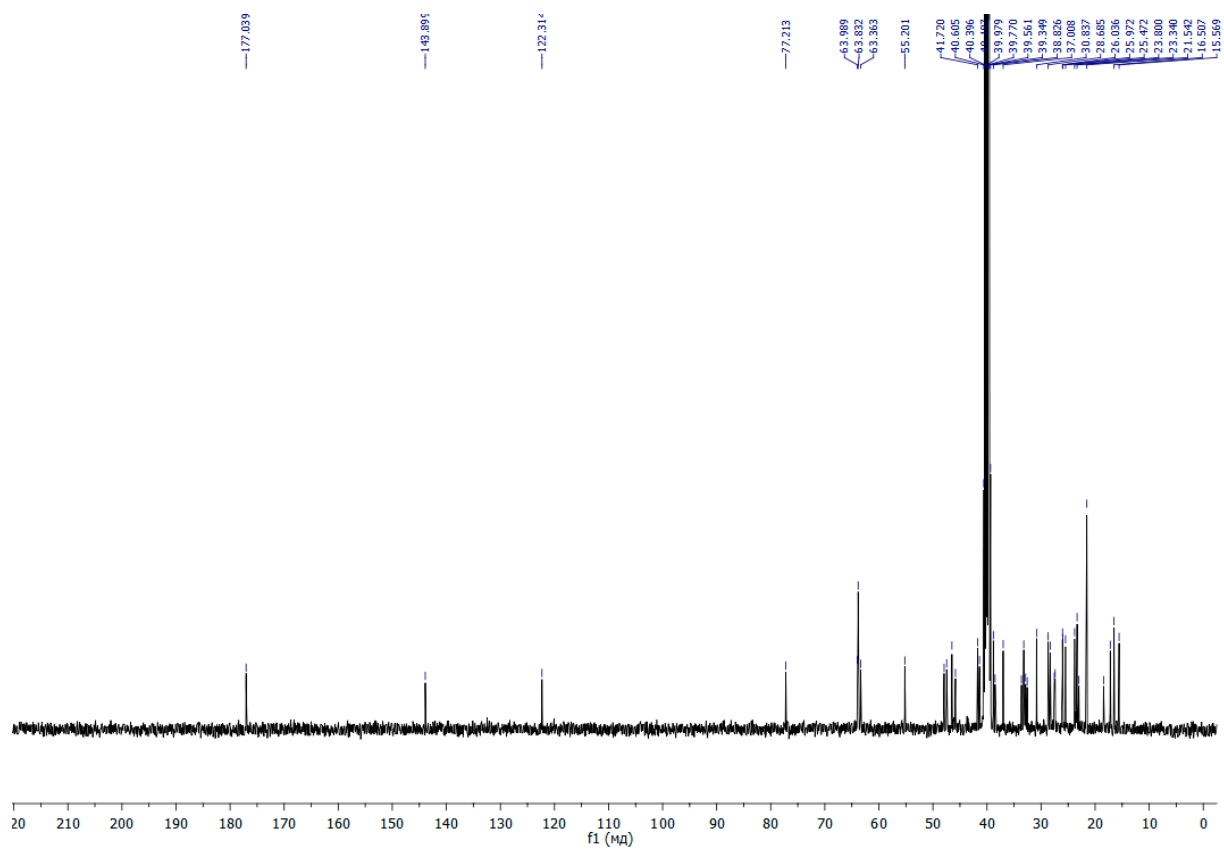

**Figure S52.**  $^1\text{H}$  NMR Spectrum of compound **12c** (500 MHz,  $\text{DMSO-d}_6$ )

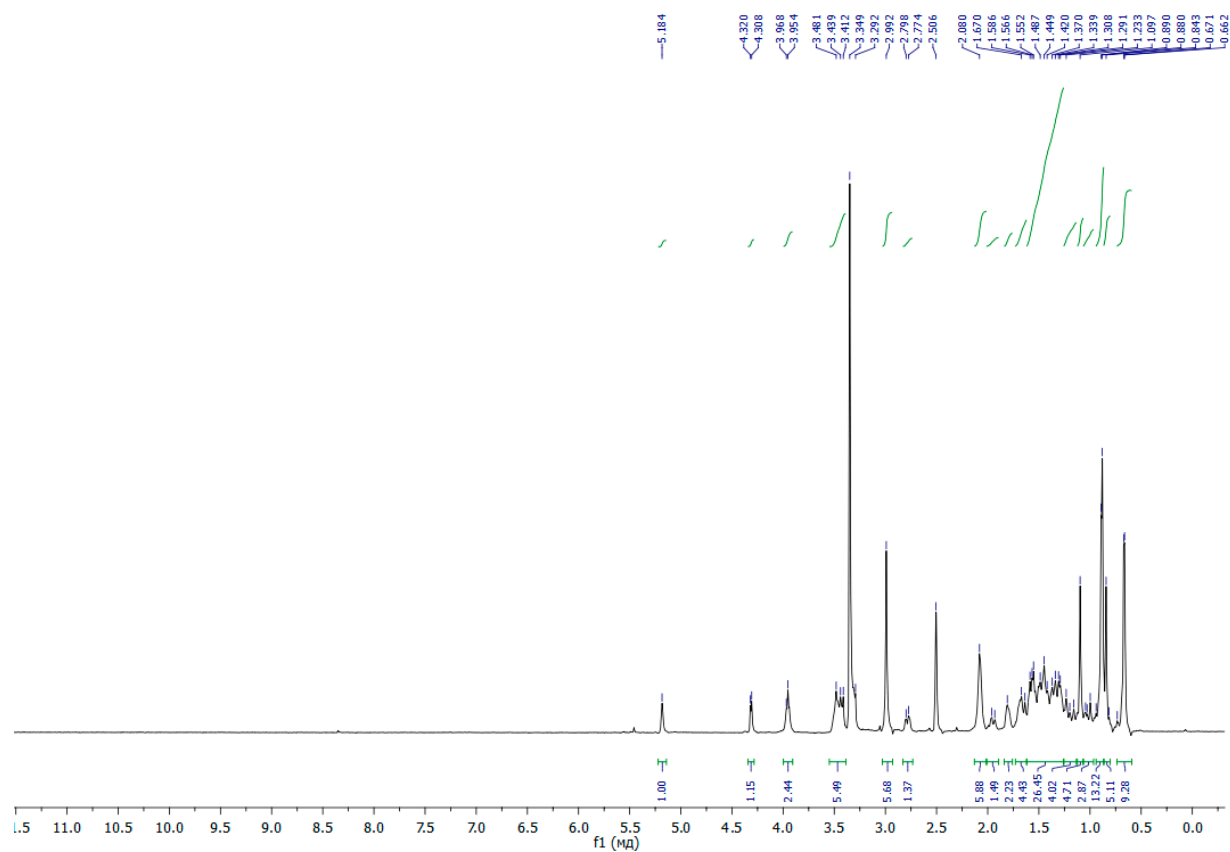

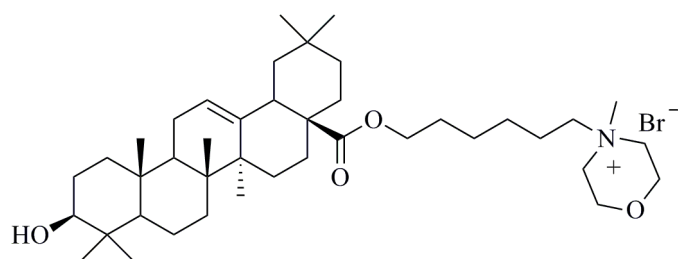

**Figure S53.**  $^{13}\text{C}$  NMR Spectrum of compound **12d** (100 MHz,  $\text{DMSO-d}_6$ )

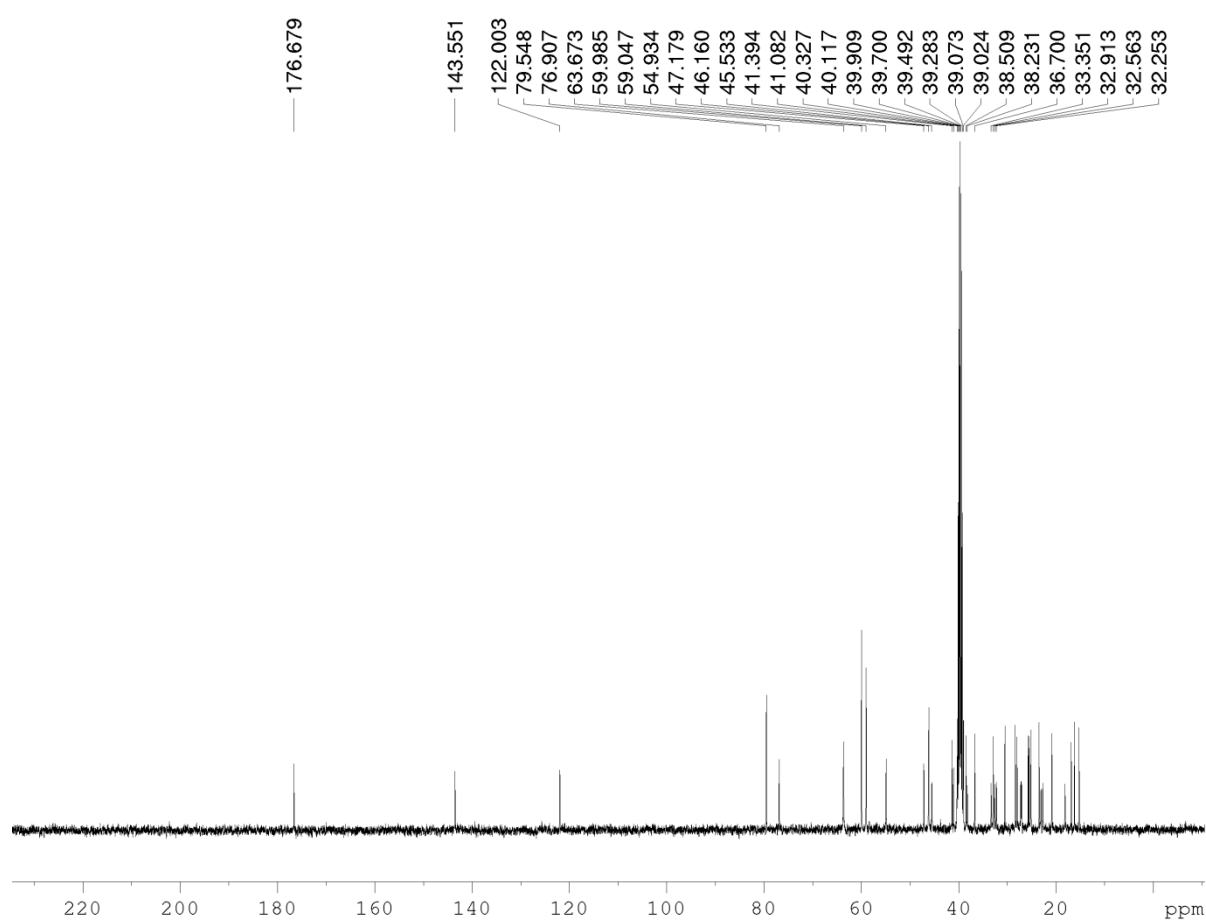

**Figure S54.**  $^1\text{H}$  NMR Spectrum of compound **12d** (400 MHz,  $\text{DMSO-d}_6$ )

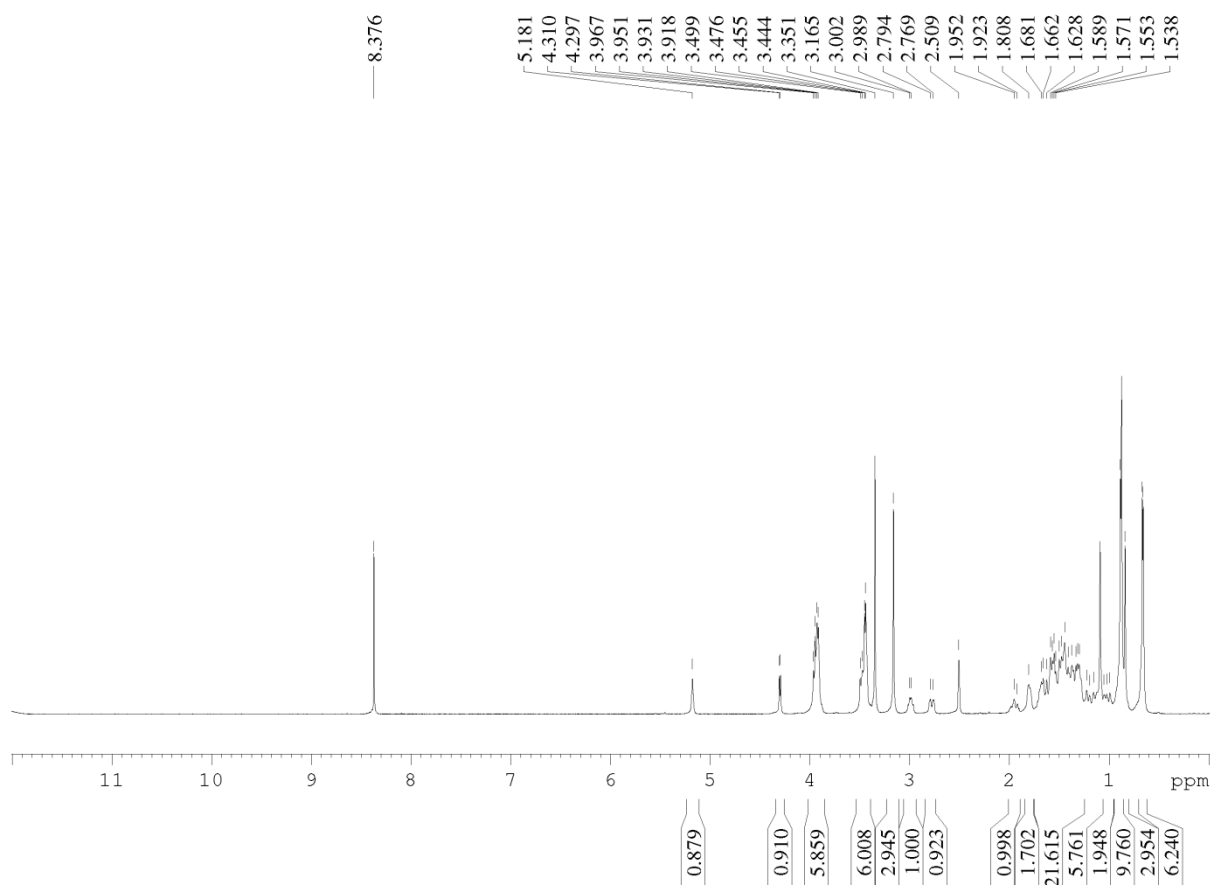



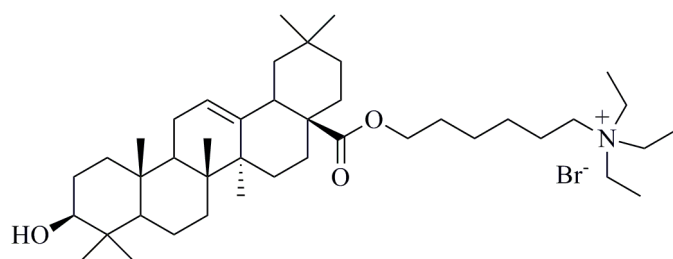

**Figure S55.**  $^{13}\text{C}$  NMR Spectrum of compound **12e** (125 MHz,  $\text{DMSO-d}_6$ )

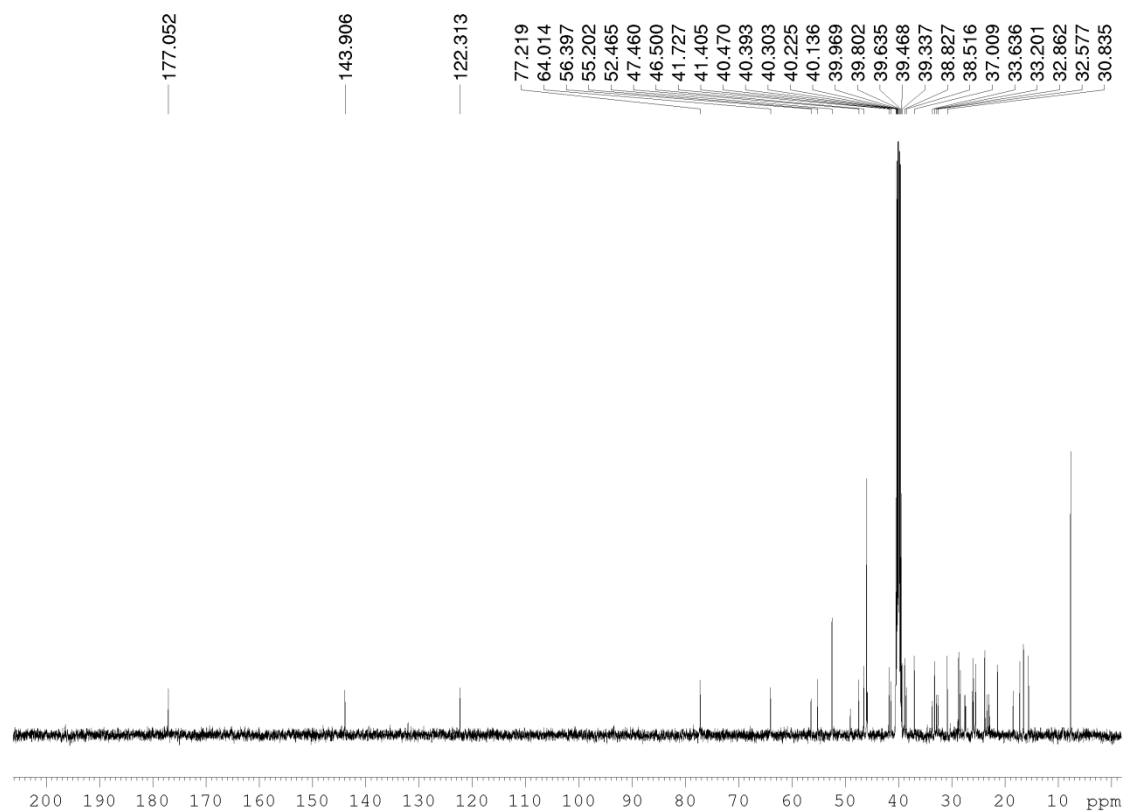

**Figure S56.**  $^1\text{H}$  NMR Spectrum of compound **12e** (500 MHz,  $\text{DMSO-d}_6$ )

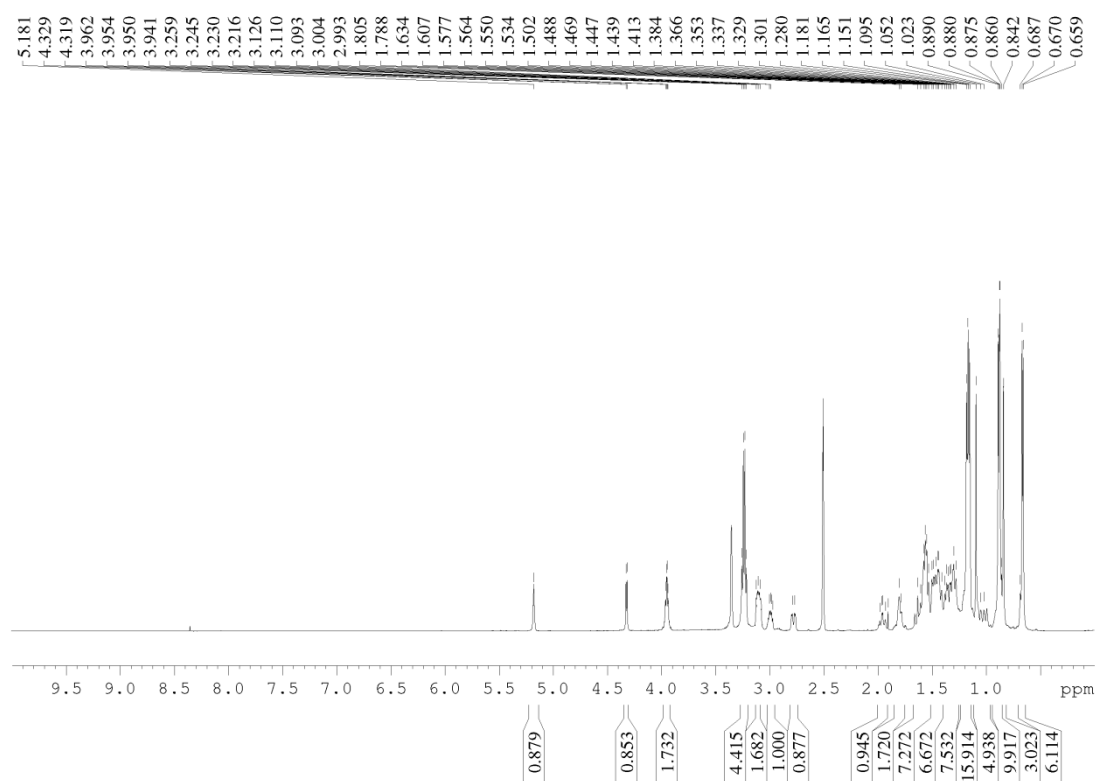

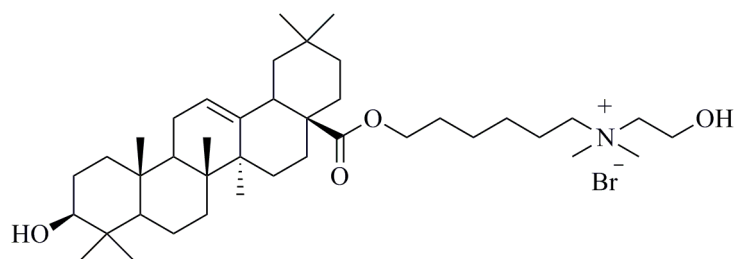

**Figure S57.**  $^{13}\text{C}$  NMR Spectrum of compound **12f** (100 MHz,  $\text{DMSO-d}_6$ )

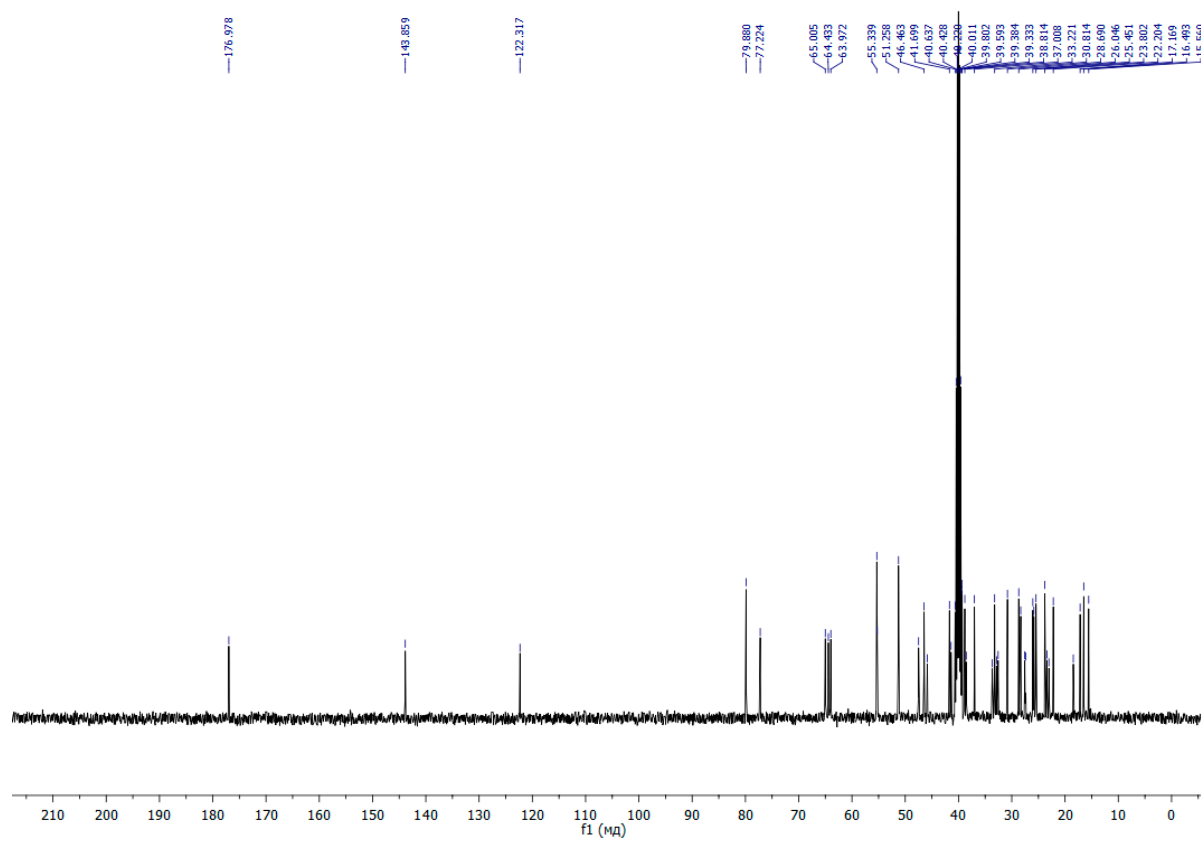

**Figure S58.**  $^1\text{H}$  NMR Spectrum of compound **12f** (400 MHz,  $\text{DMSO-d}_6$ )

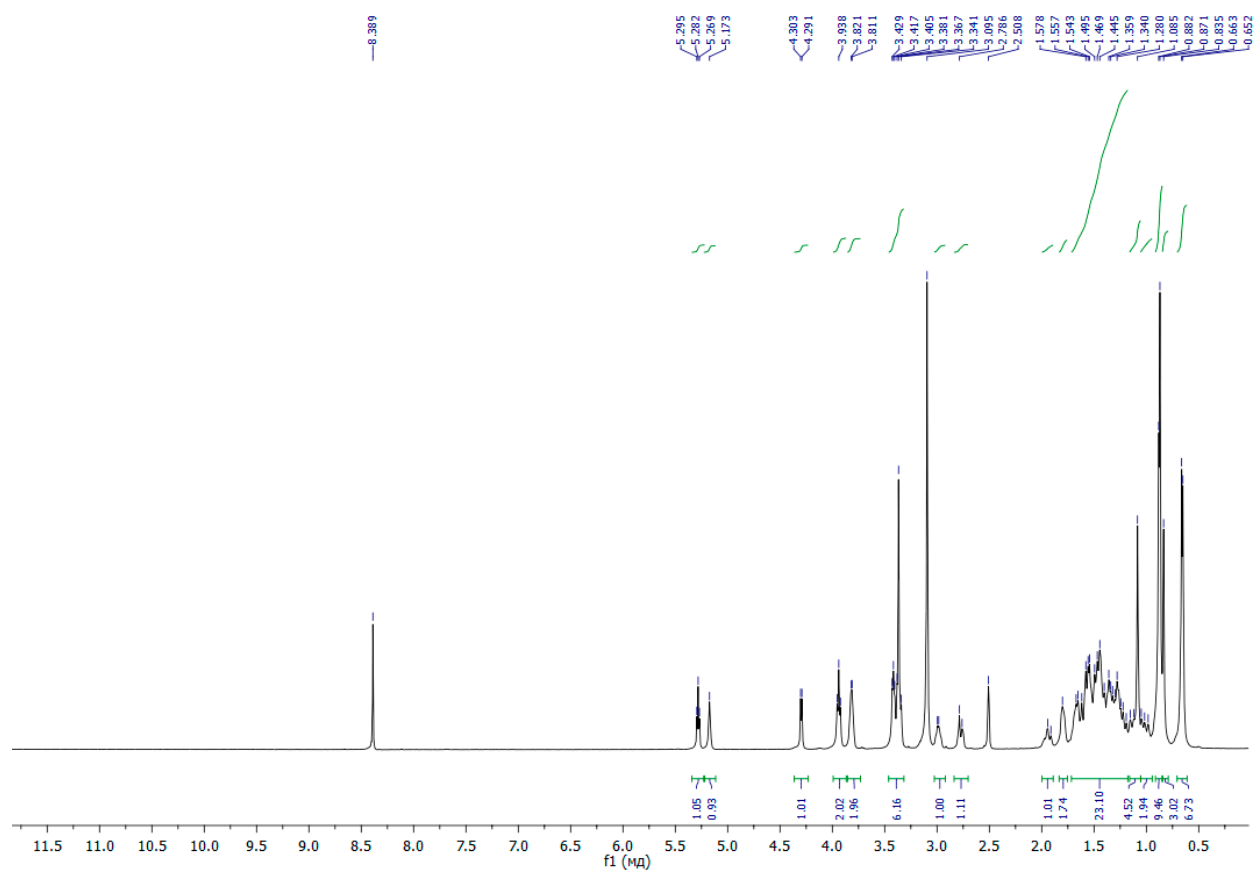

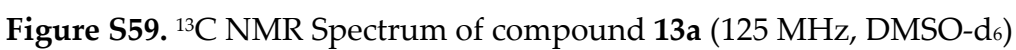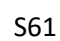

**Figure S60.**  $^1\text{H}$  NMR Spectrum of compound **13a** (500 MHz,  $\text{DMSO-d}_6$ )

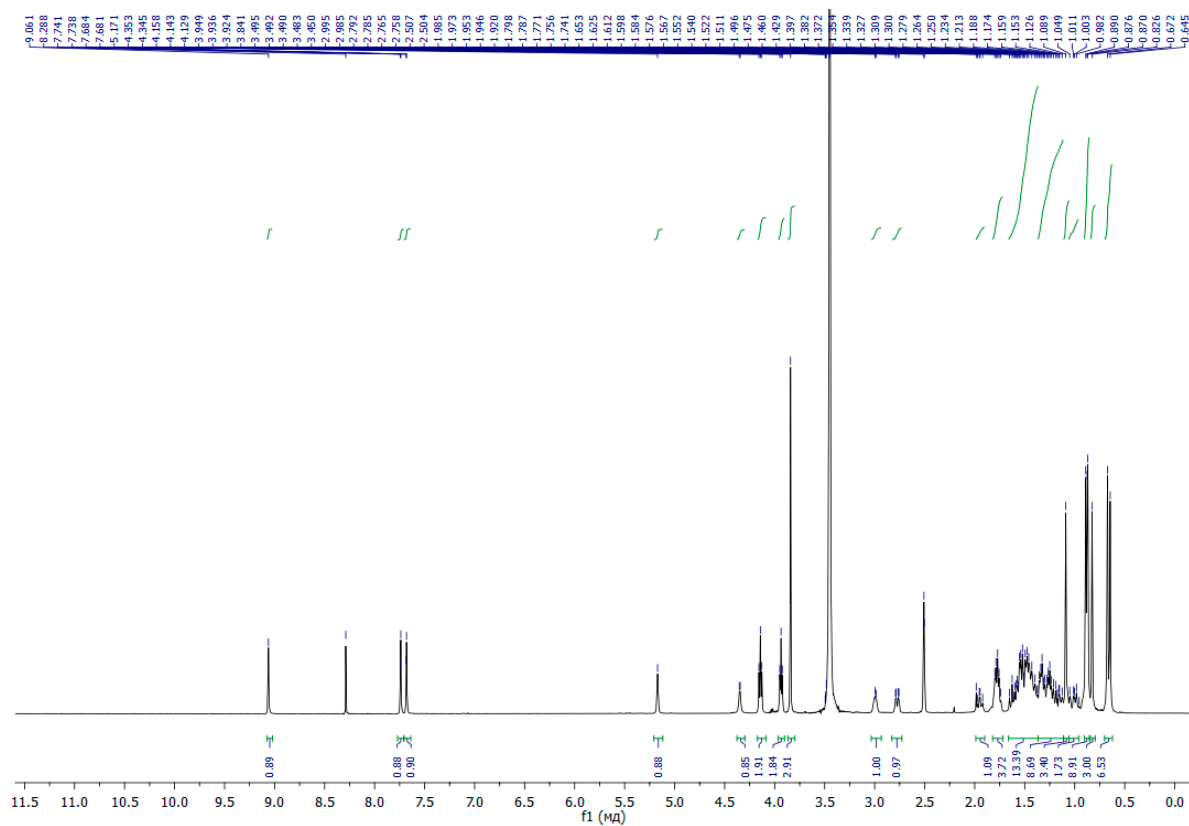

**Figure S61.**  $^{19}\text{F}$  NMR Spectrum of compound **13a** (376 MHz,  $\text{DMSO-d}_6$ )

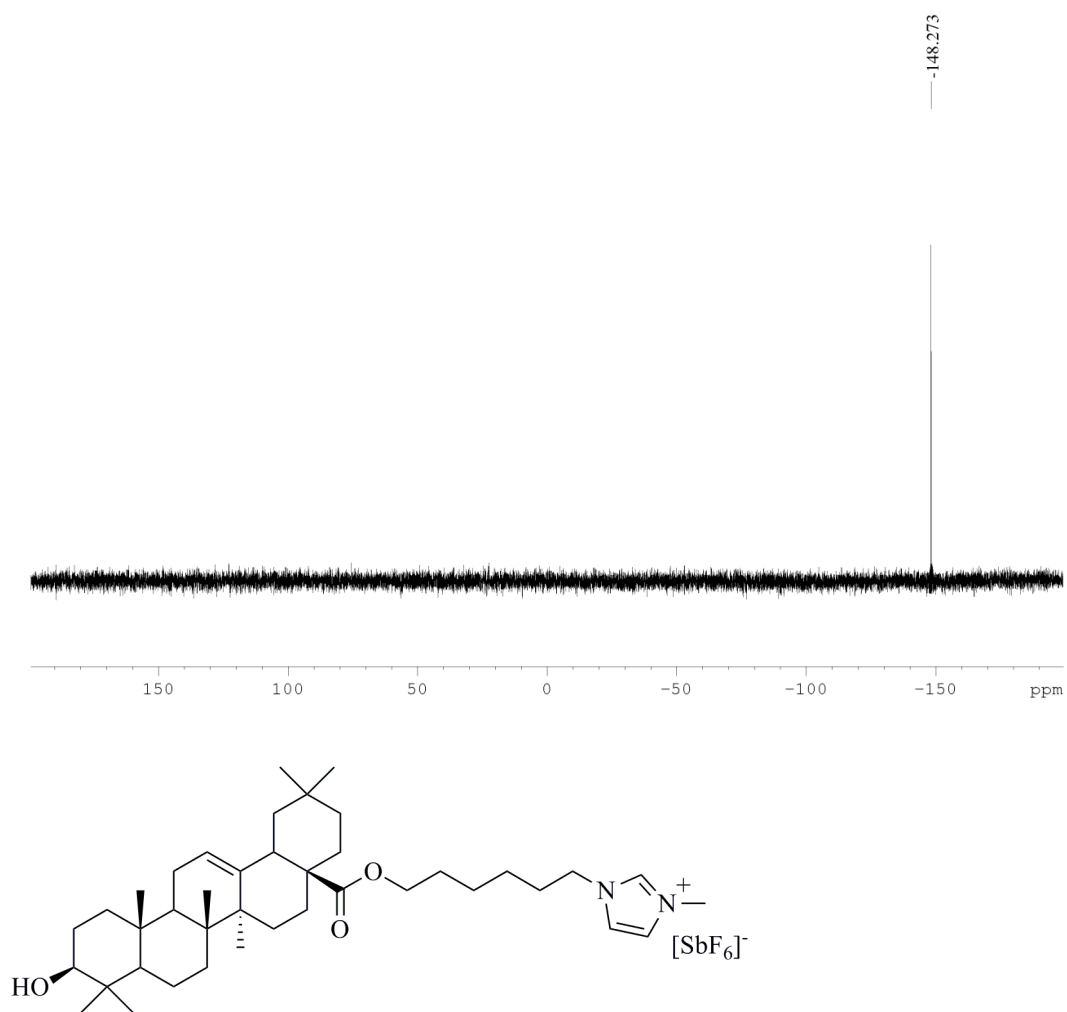

**Figure S62.**  $^{13}\text{C}$  NMR Spectrum of compound **13b** (100 MHz, DMSO- $d_6$ )

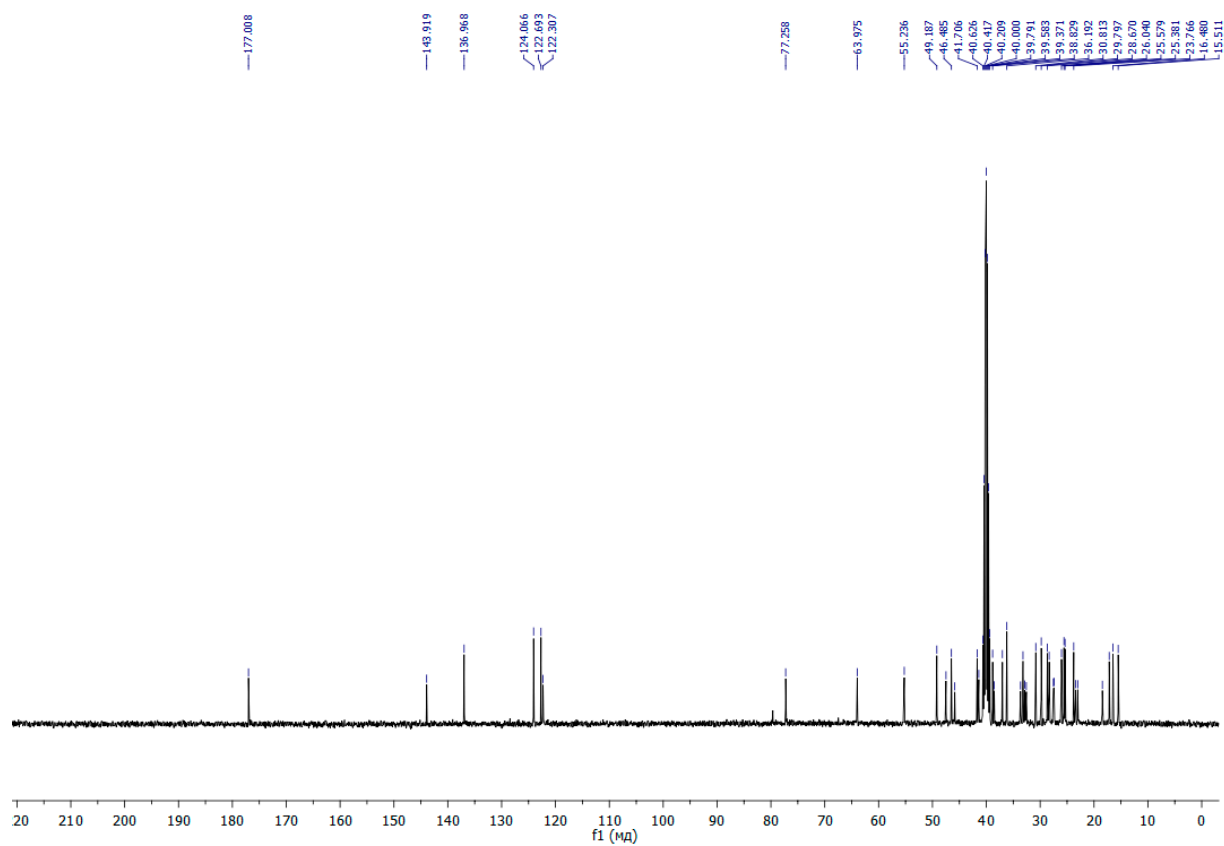

**Figure S63.**  $^1\text{H}$  NMR Spectrum of compound **13b** (400 MHz,  $\text{DMSO-d}_6$ )



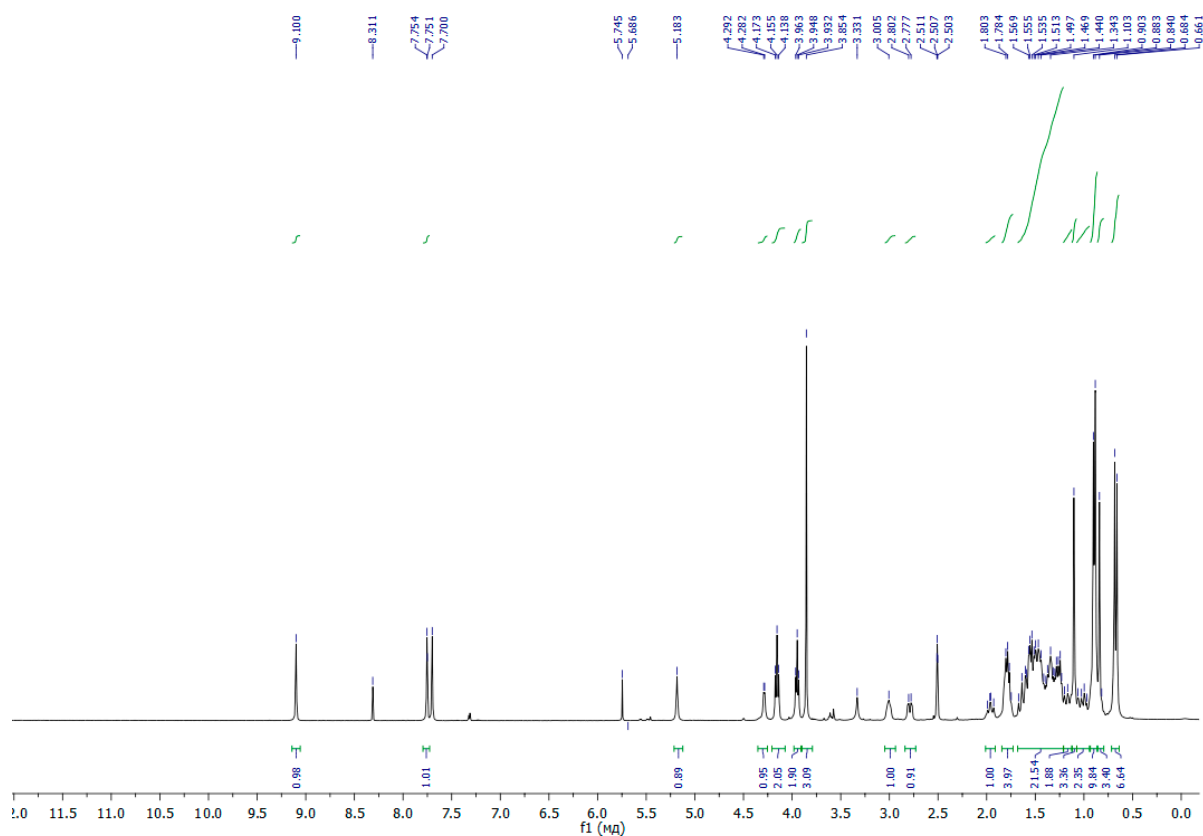

**Figure S64.** <sup>1</sup>H NMR Spectrum of compound **13b** (376 MHz, DMSO-d<sub>6</sub>)

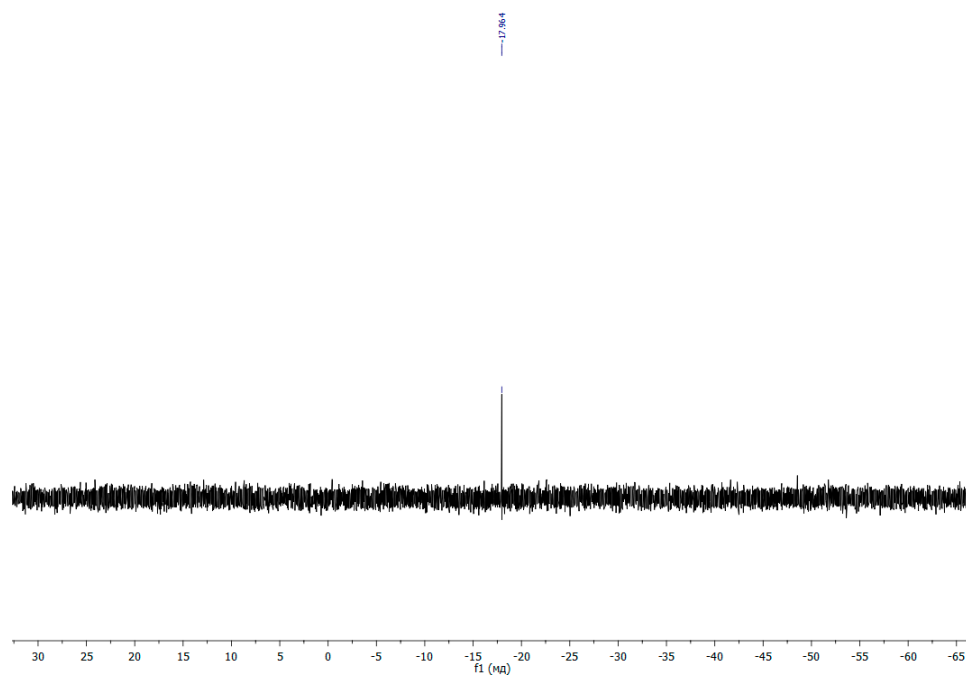

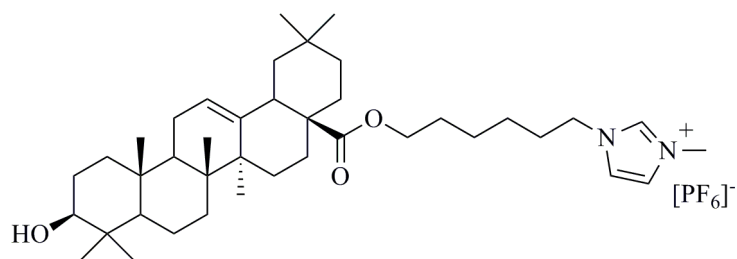

**Figure S65.**  $^{13}\text{C}$  NMR Spectrum of compound 13c (100 MHz,  $\text{DMSO-d}_6$ )

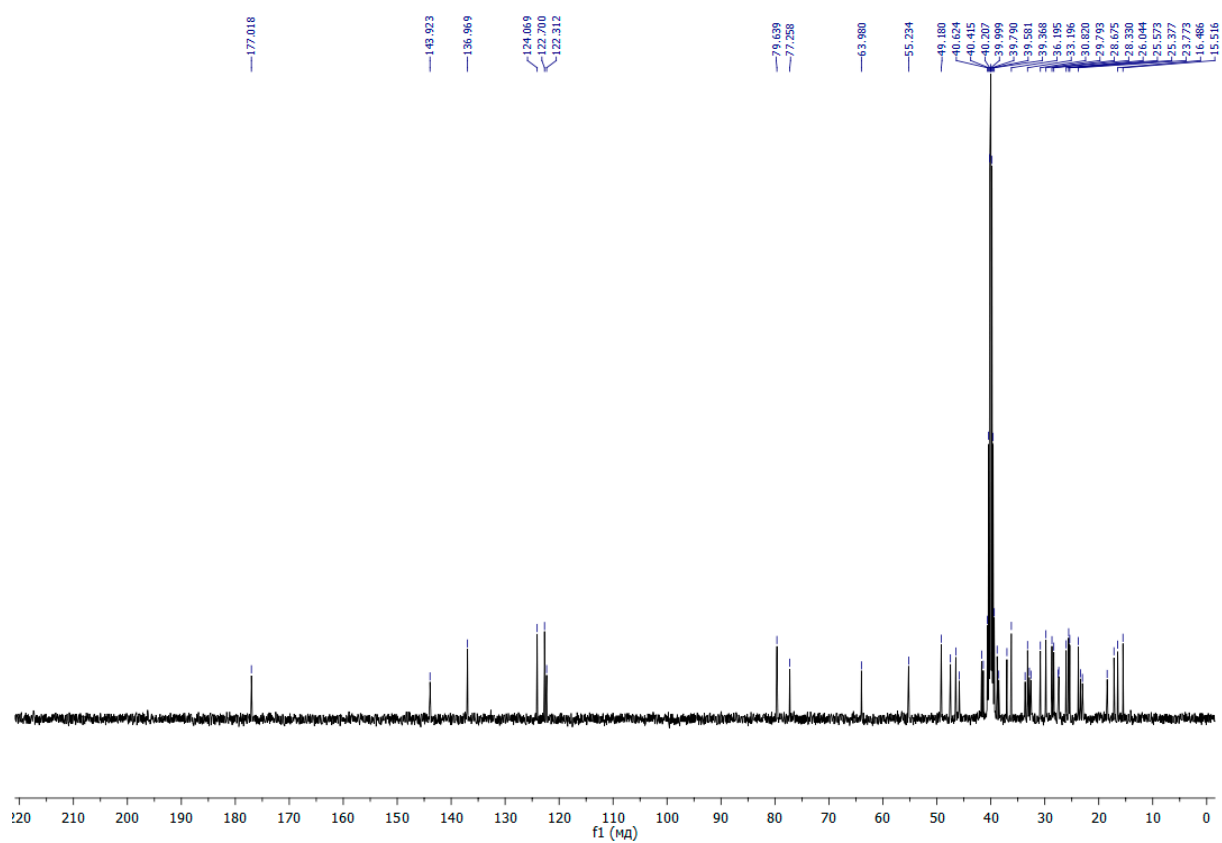

**Figure S66.**  $^1\text{H}$  NMR Spectrum of compound **13c** (400 MHz,  $\text{DMSO-d}_6$ )

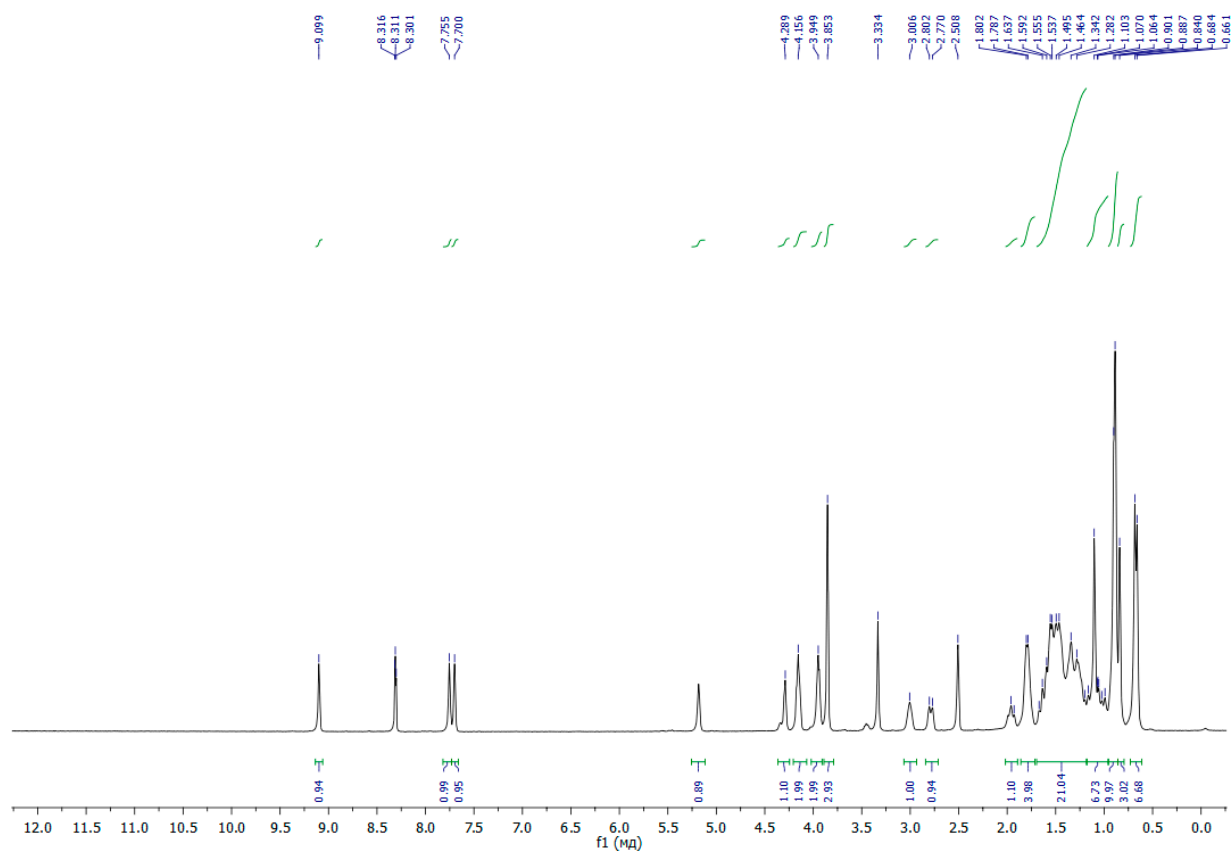

**Figure S67.**  $^{19}\text{F}$  NMR Spectrum of compound **13c** (376 MHz,  $\text{DMSO-d}_6$ )

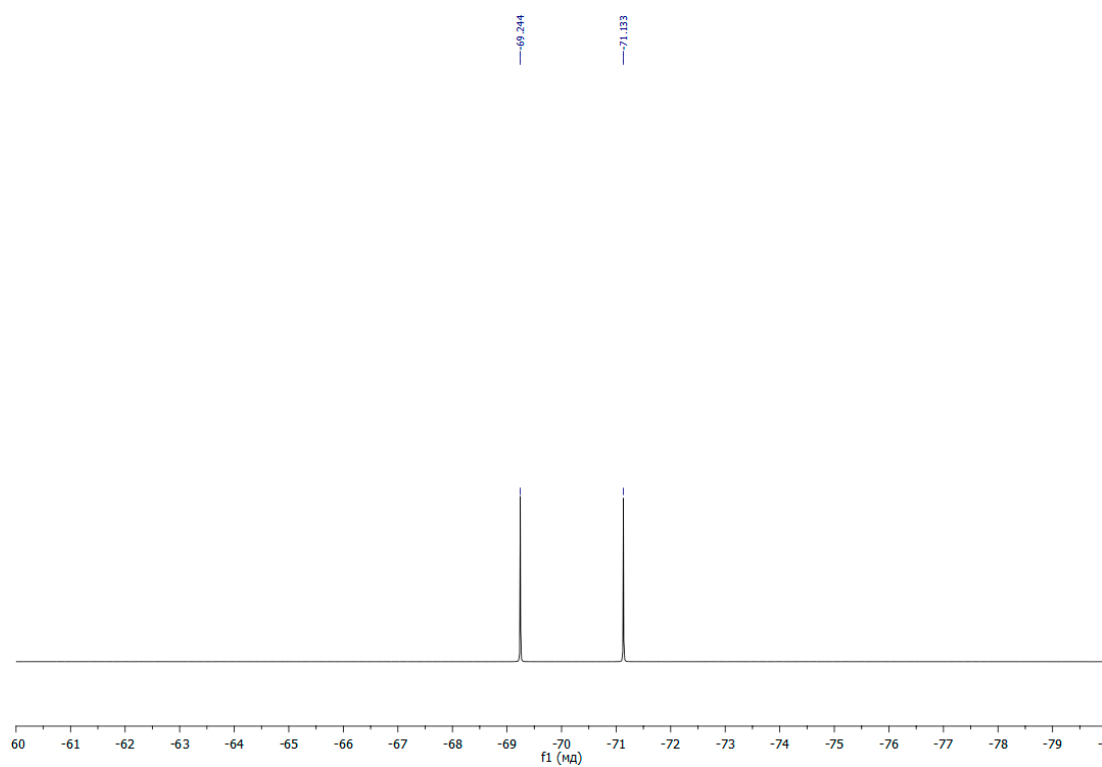

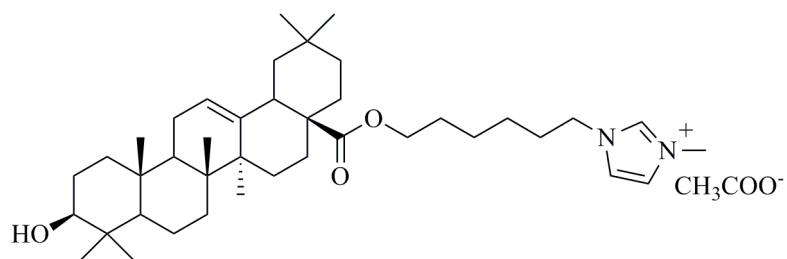

**Figure S68.** <sup>13</sup>C NMR Spectrum of compound 13d (100 MHz, DMSO-d<sub>6</sub>)

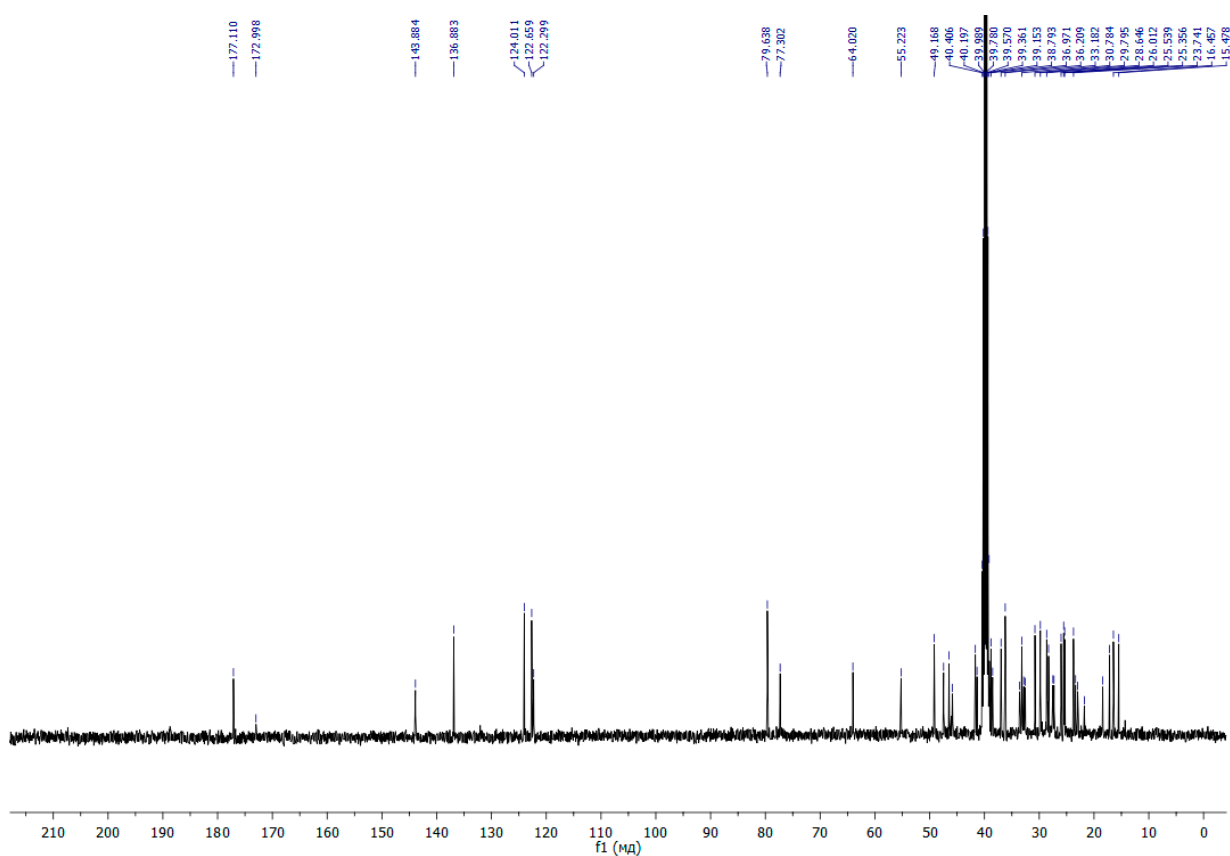

**Figure S69.**  $^1\text{H}$  NMR Spectrum of compound **13d** (400 MHz,  $\text{DMSO-d}_6$ )

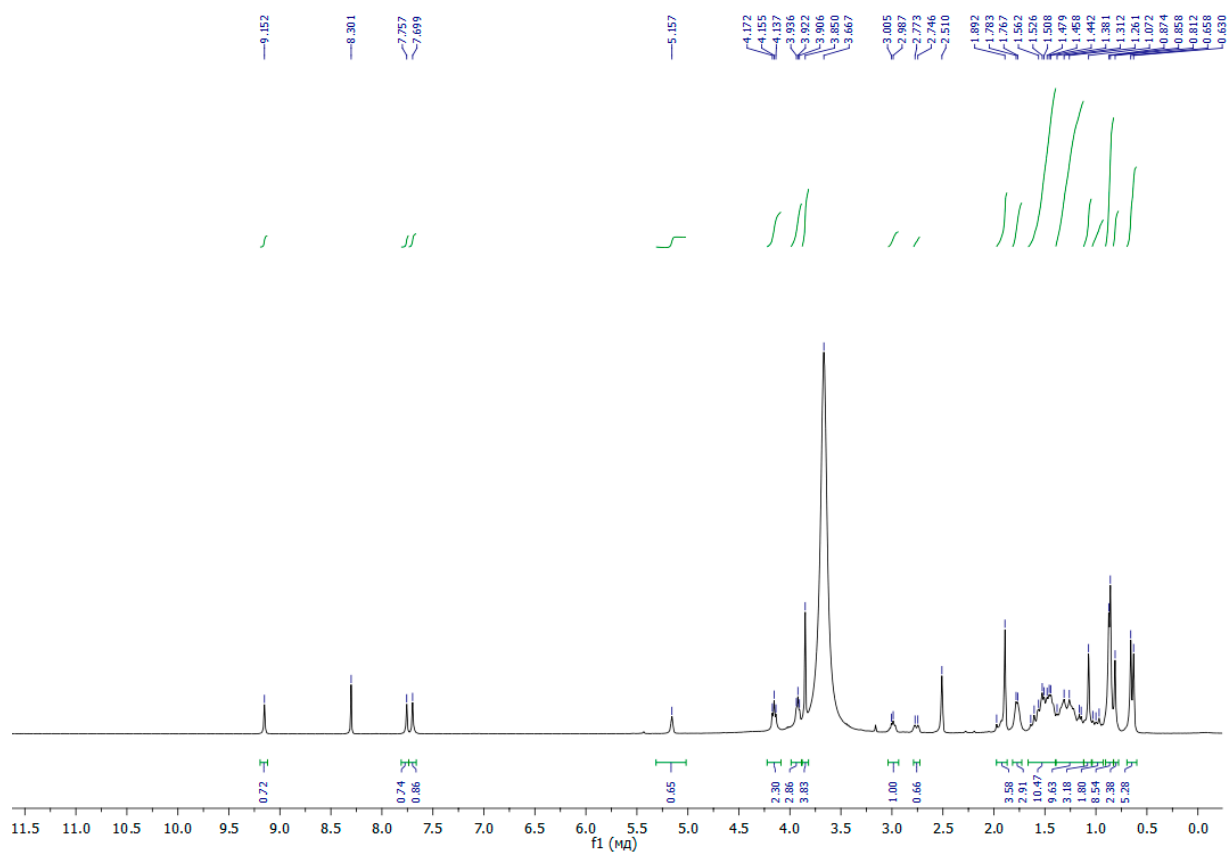

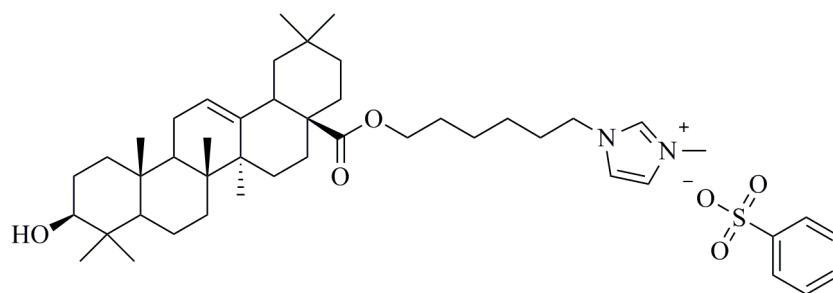

**Figure S70.**  $^{13}\text{C}$  NMR Spectrum of compound **13e** (100 MHz,  $\text{DMSO-d}_6$ )

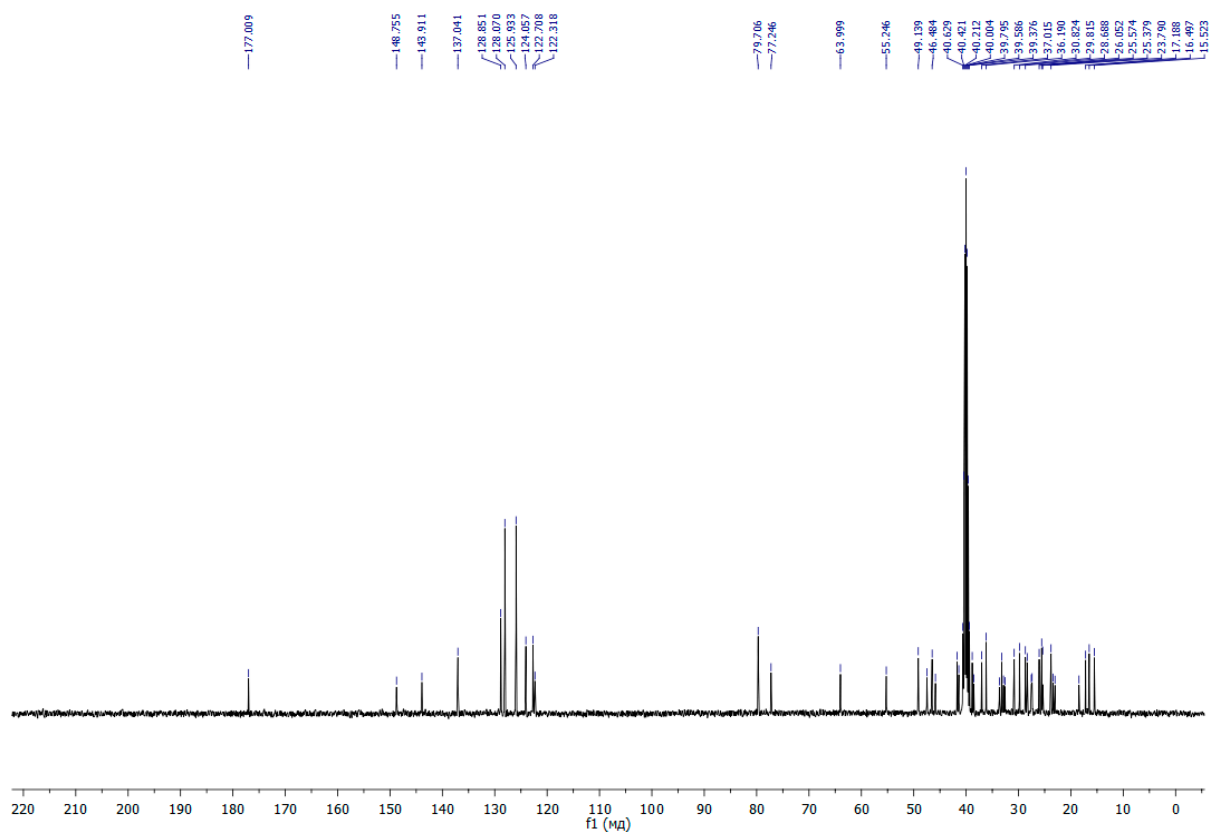

**Figure S71.**  $^1\text{H}$  NMR Spectrum of compound **13e** (400 MHz,  $\text{DMSO-d}_6$ )

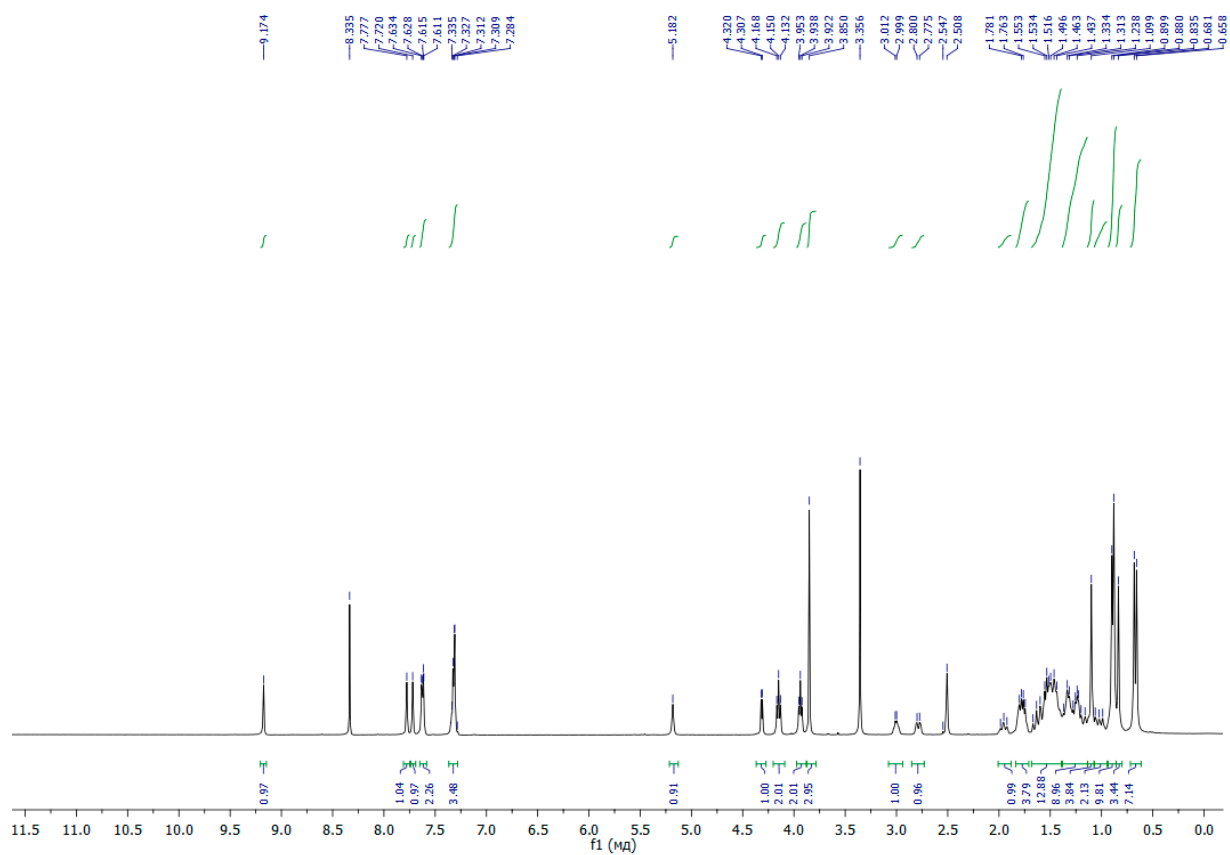

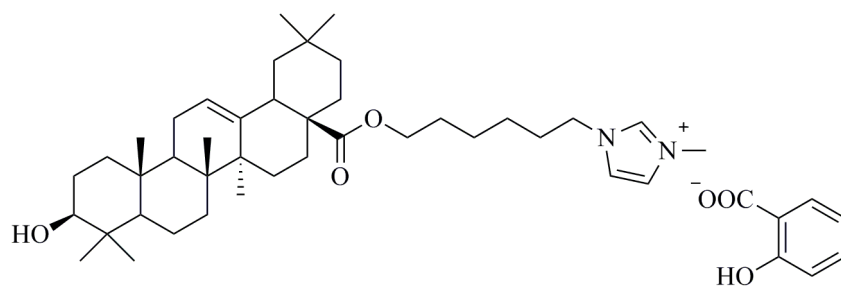

**Figure S72.**  $^{13}\text{C}$  NMR Spectrum of compound **13f** (100 MHz,  $\text{DMSO-d}_6$ )

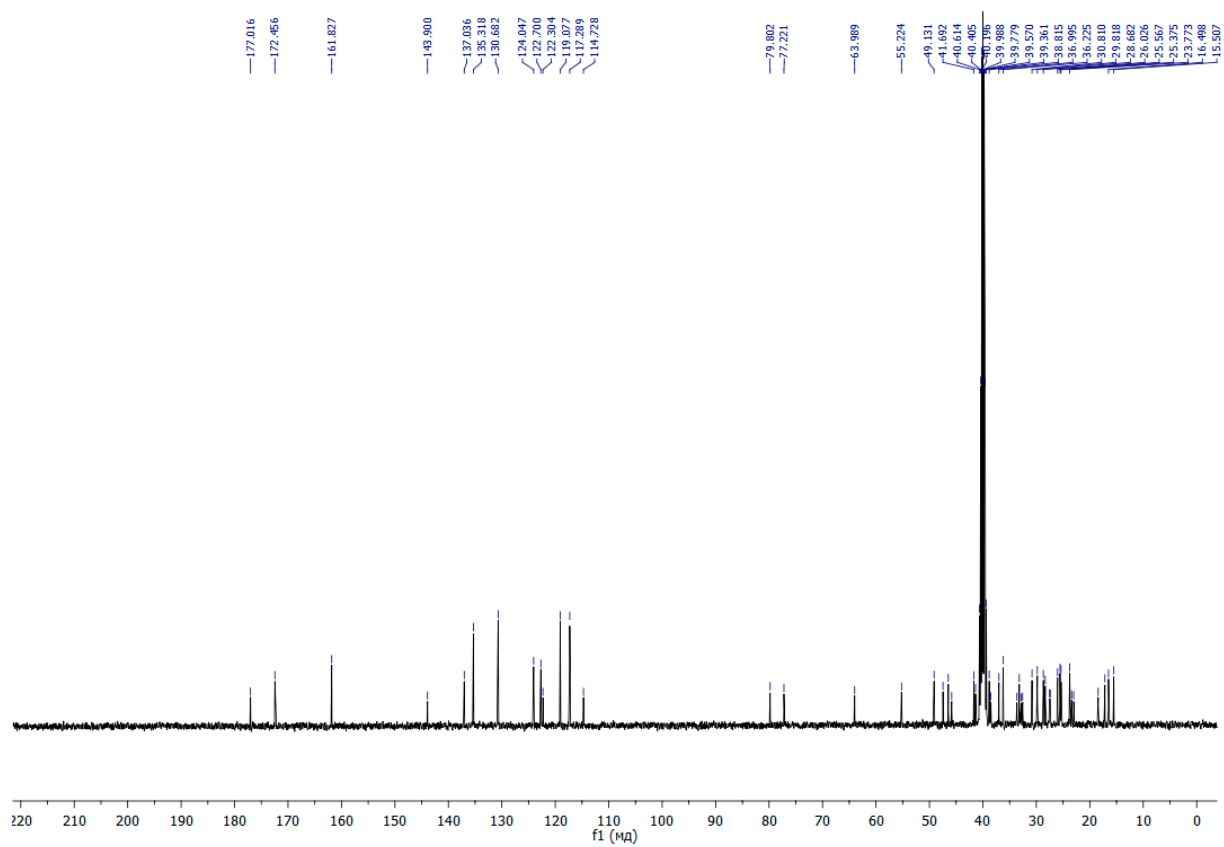



**Figure S73.**  $^1\text{H}$  NMR Spectrum of compound **13f** (400 MHz,  $\text{DMSO-d}_6$ )

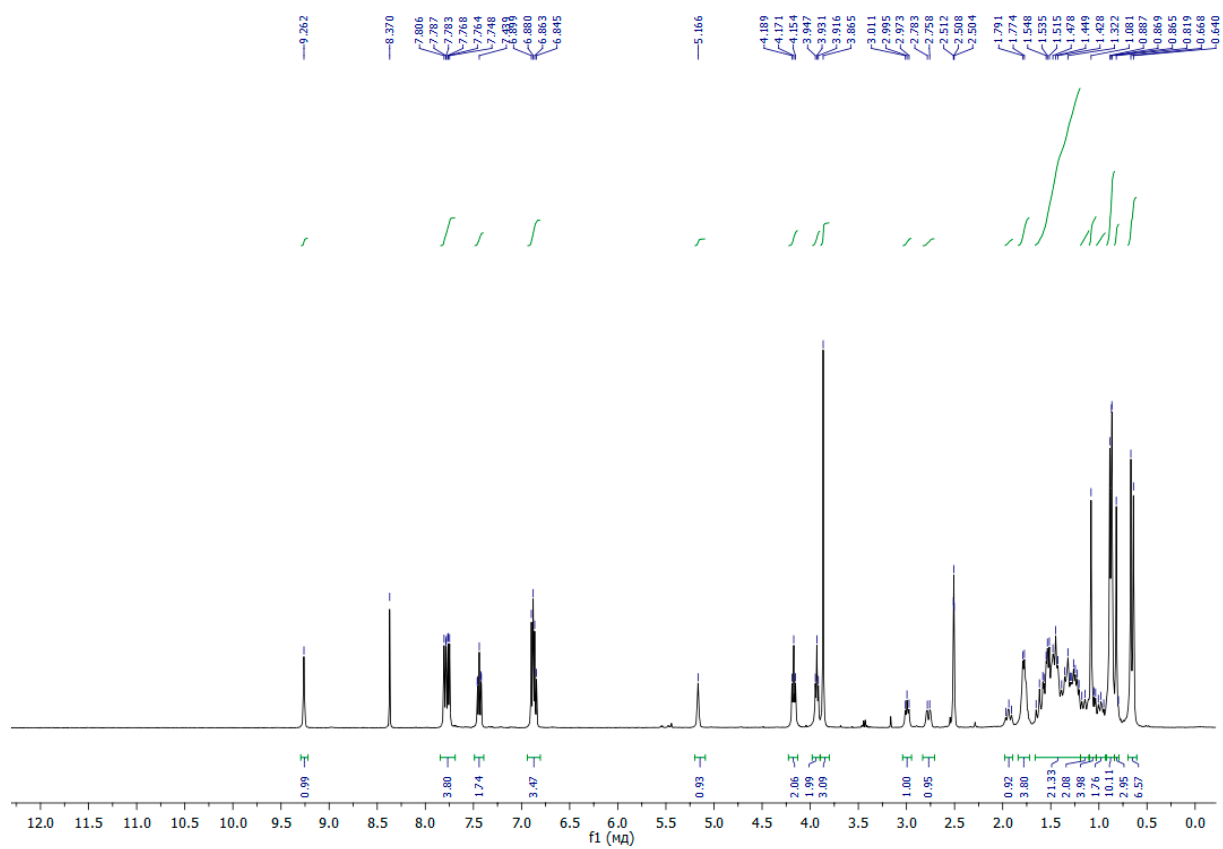

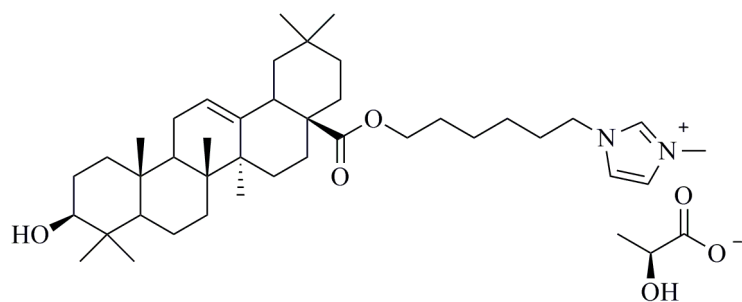

**Figure S74.**  $^{13}\text{C}$  NMR Spectrum of compound **13g** (100 MHz,  $\text{DMSO-d}_6$ )

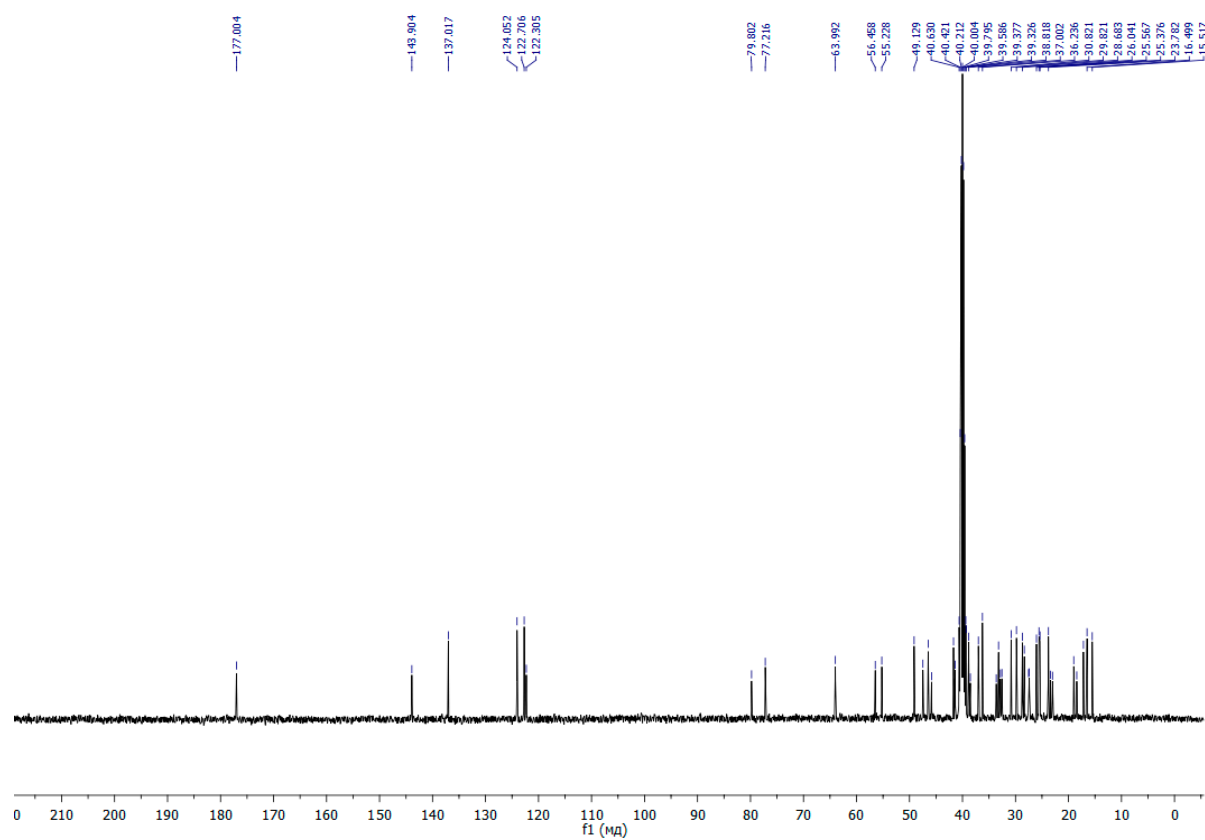

**Figure S75.**  $^1\text{H}$  NMR Spectrum of compound **13g** (400 MHz,  $\text{DMSO-d}_6$ )

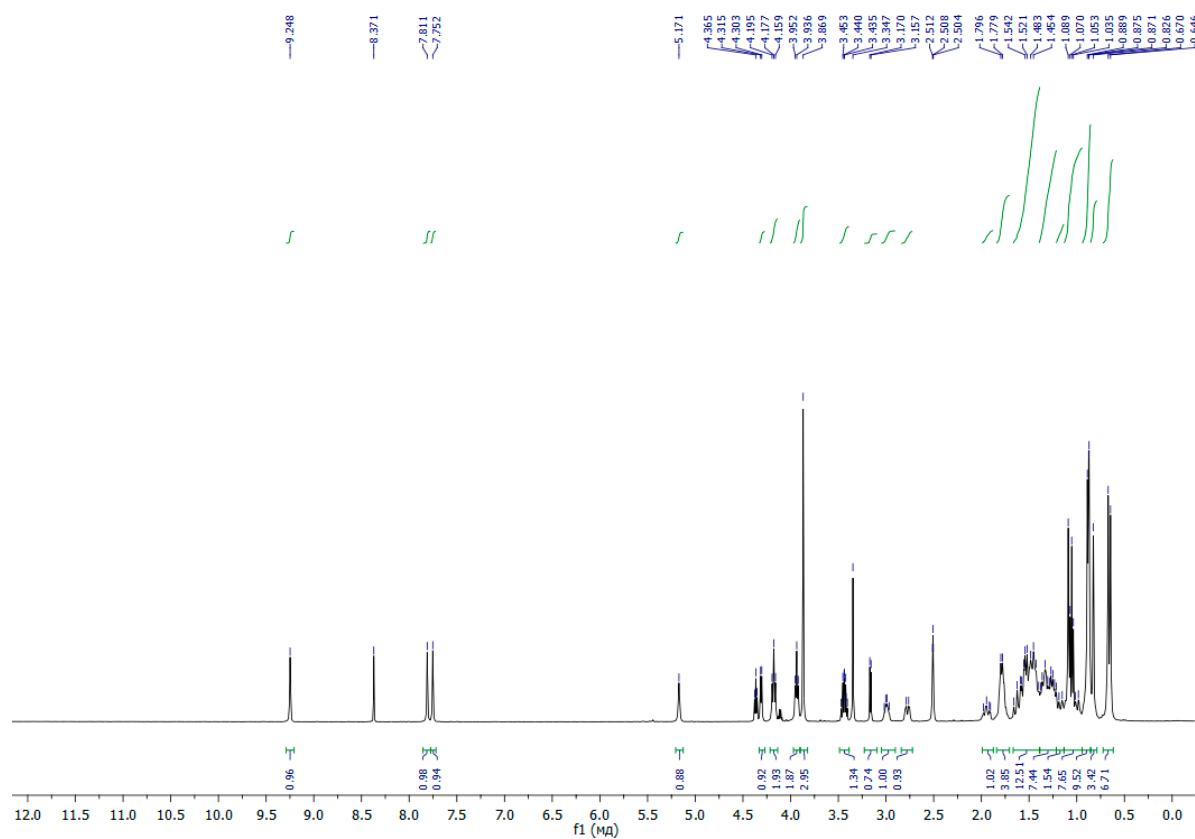

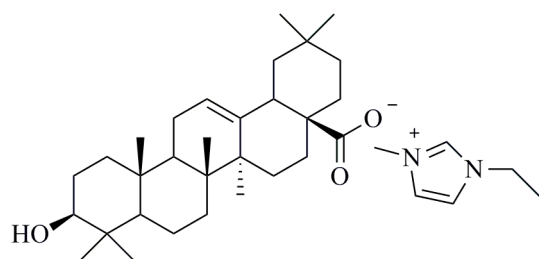

**Figure S76.**  $^{13}\text{C}$  NMR Spectrum of compound **15a** (100 MHz,  $\text{DMSO-d}_6$ )

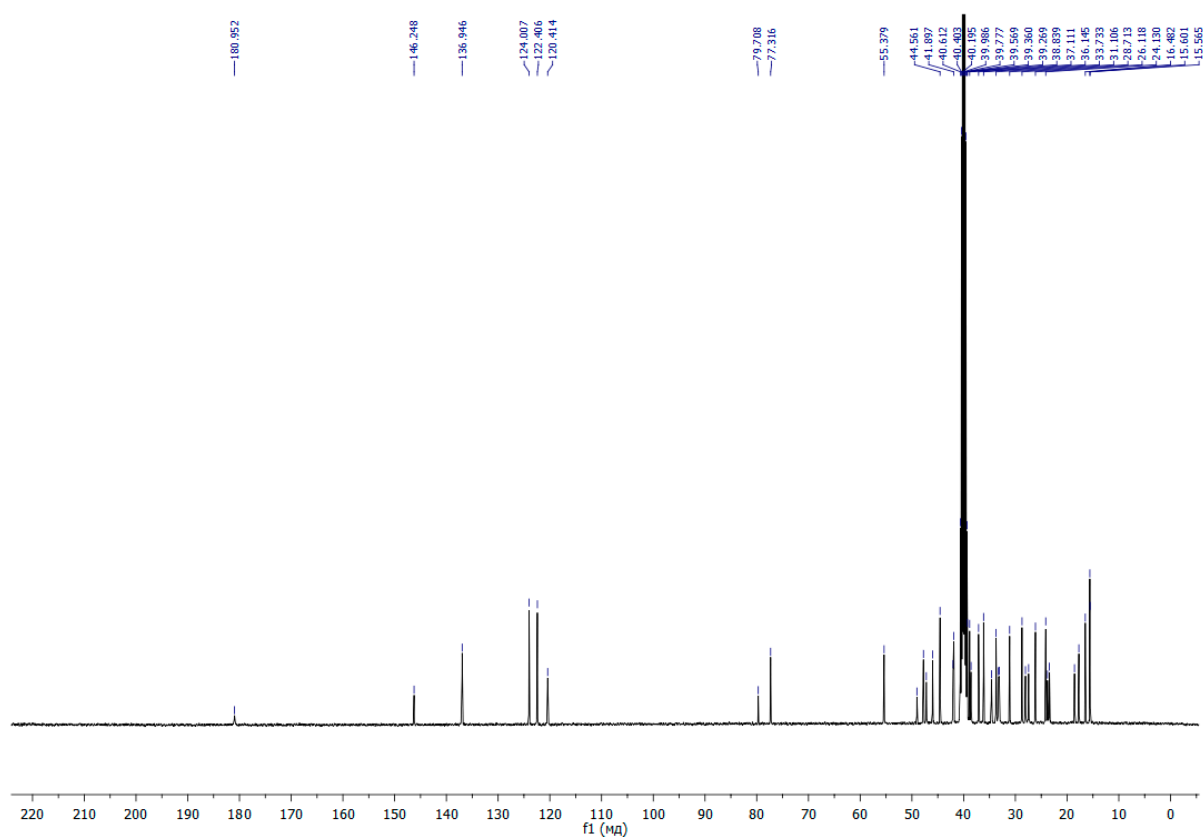

**Figure S77.**  $^1\text{H}$  NMR Spectrum of compound **15a** (400 MHz, DMSO- $d_6$ )

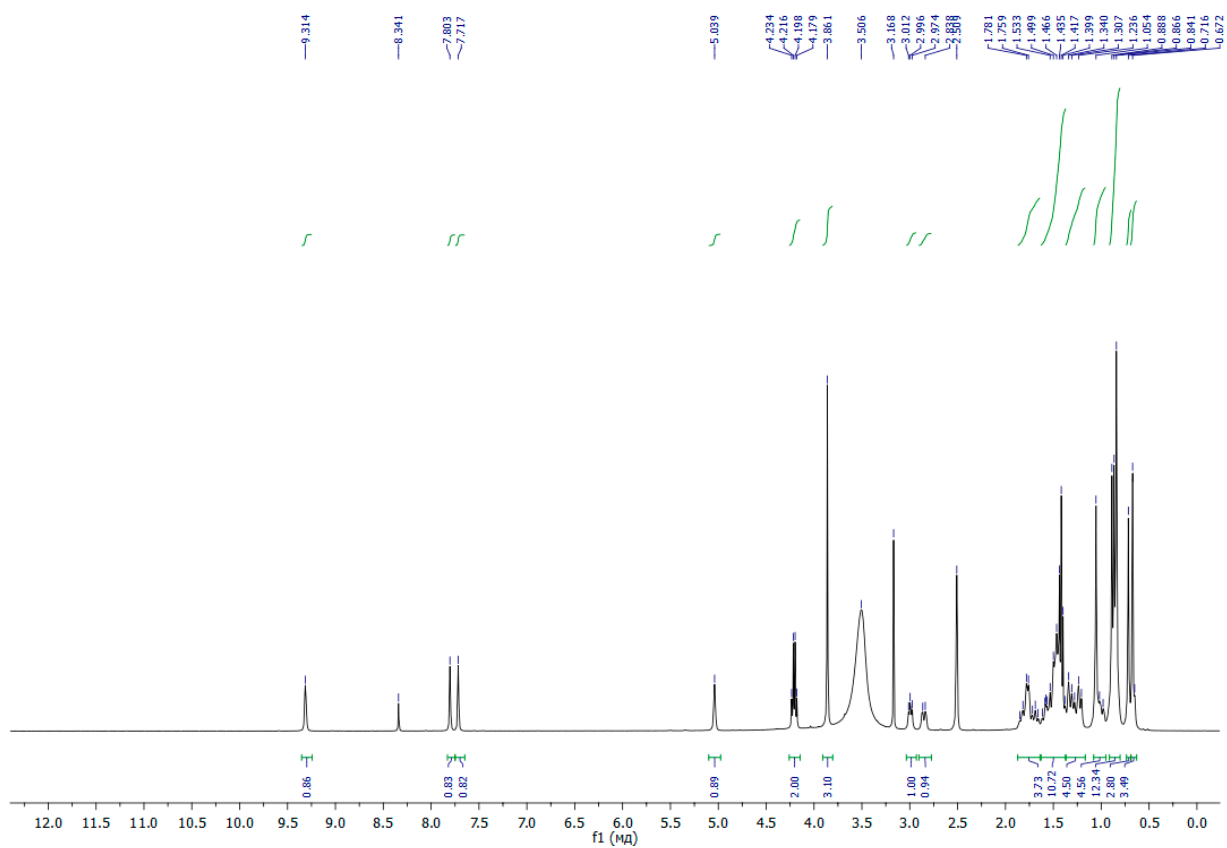

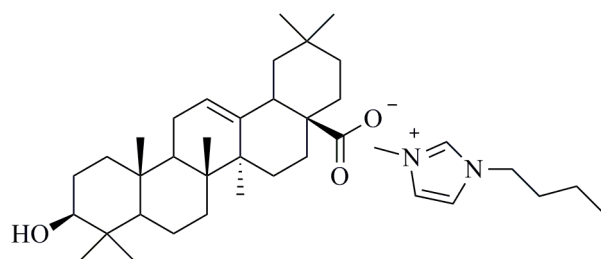

**Figure S78.**  $^{13}\text{C}$  NMR Spectrum of compound **15b** (100 MHz,  $\text{DMSO-d}_6$ )

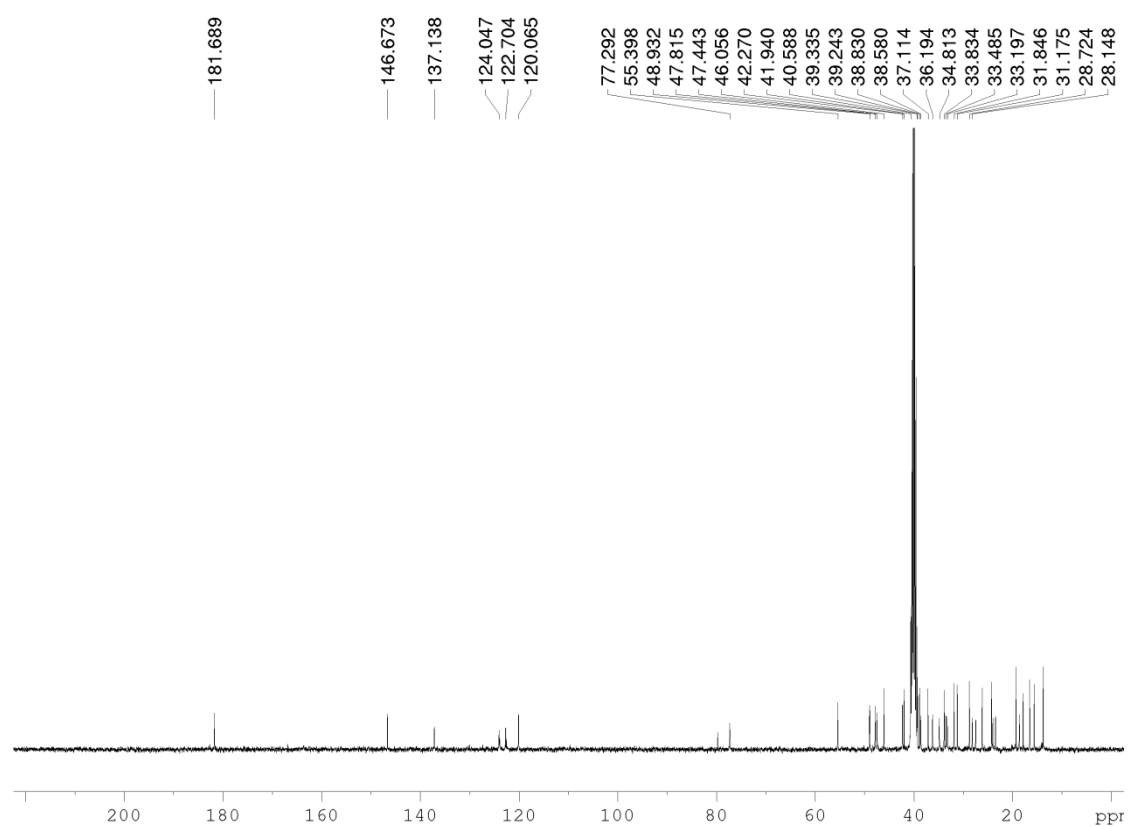

**Figure S79.**  $^1\text{H}$  NMR Spectrum of compound **15b** (400 MHz,  $\text{DMSO-d}_6$ )

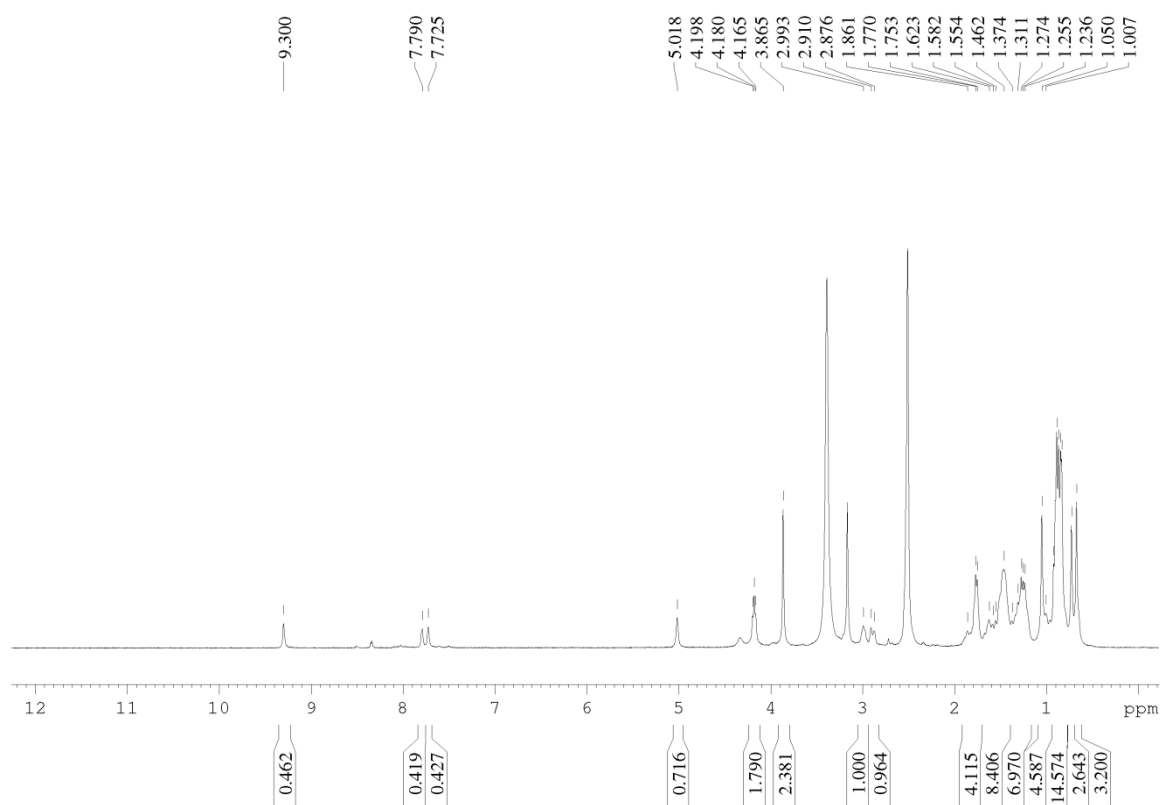

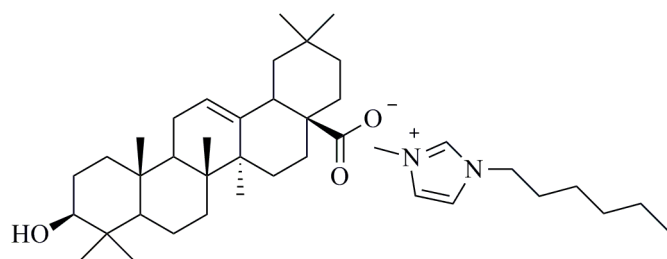

**Figure S80.**  $^{13}\text{C}$  NMR Spectrum of compound **15c** (100 MHz,  $\text{DMSO-d}_6$ )

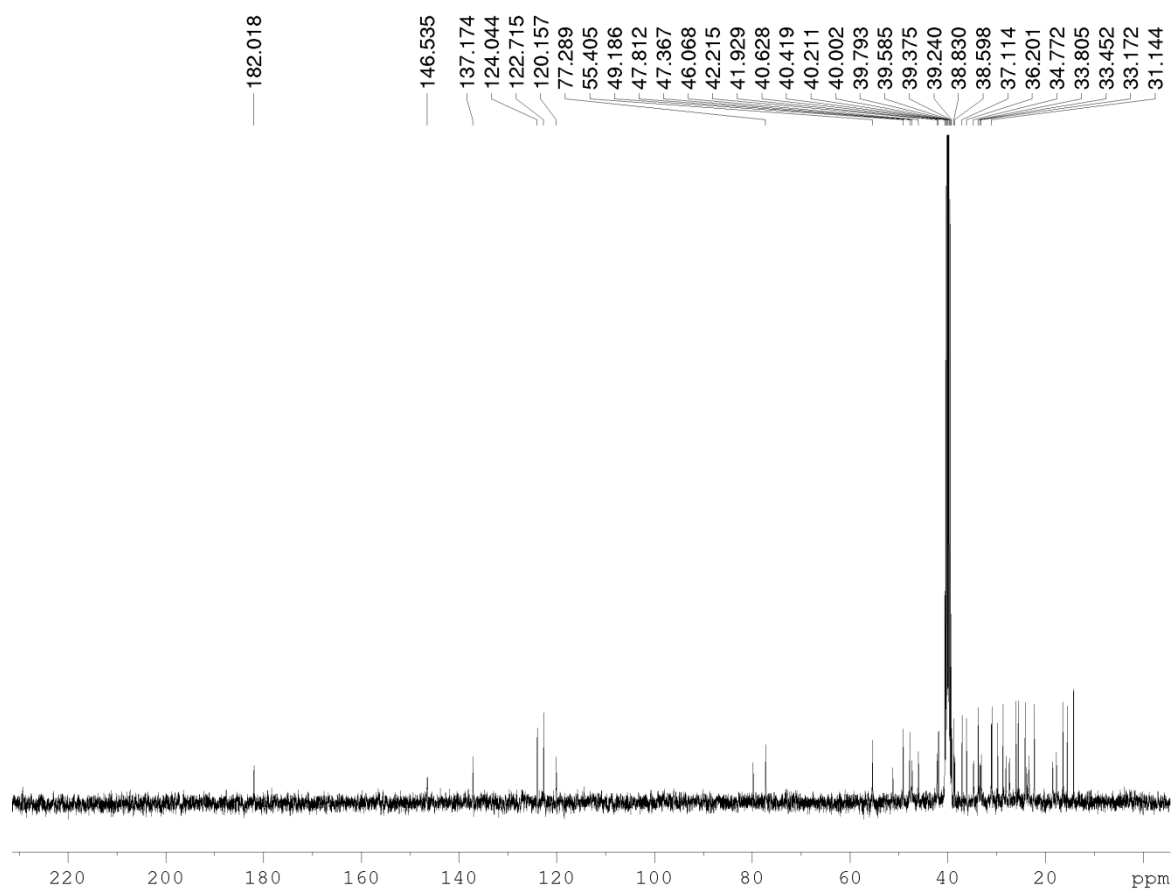



**Figure S81.**  $^1\text{H}$  NMR Spectrum of compound **15c** (400 MHz,  $\text{DMSO-d}_6$ )

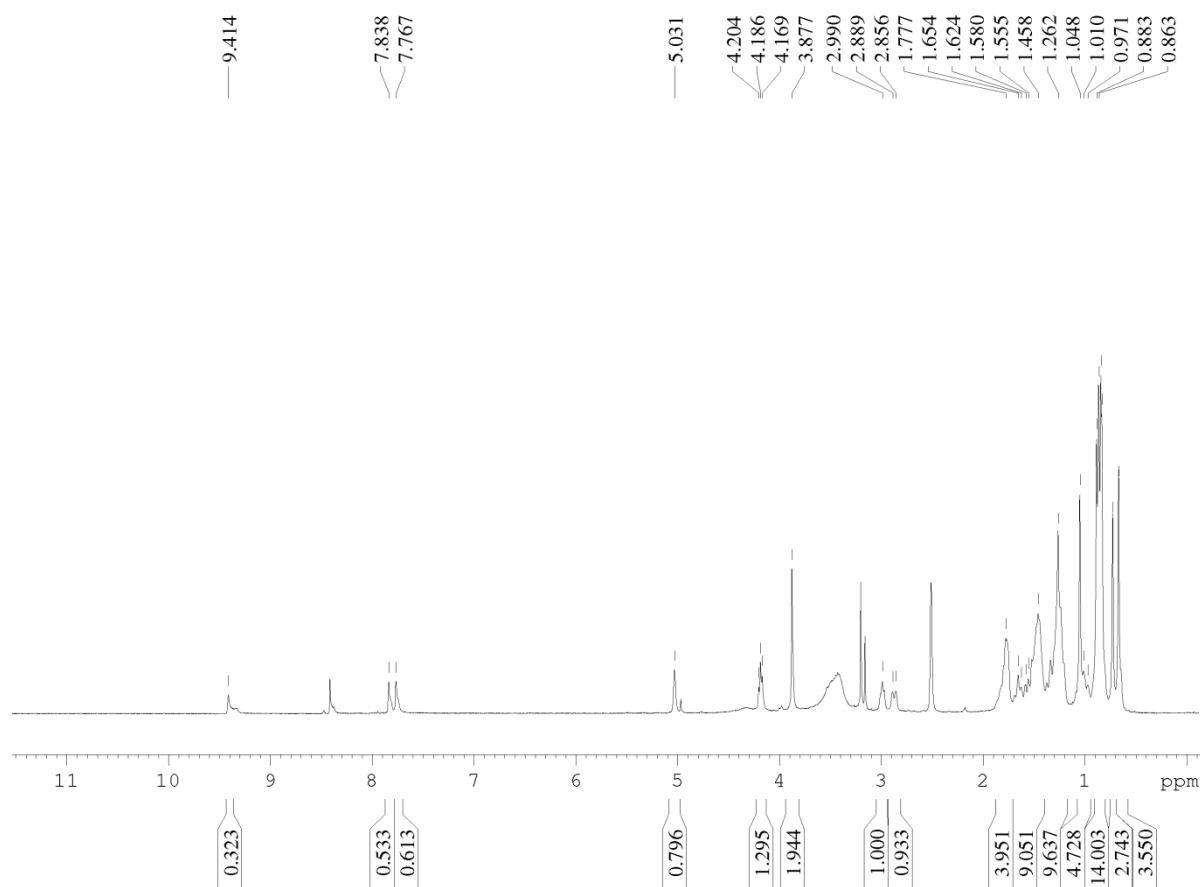

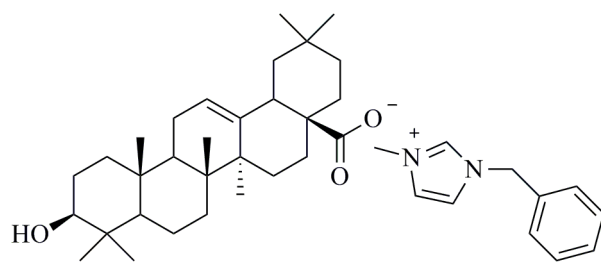

**Figure S82.**  $^{13}\text{C}$  NMR Spectrum of compound **15d** (100 MHz,  $\text{DMSO-d}_6$ )

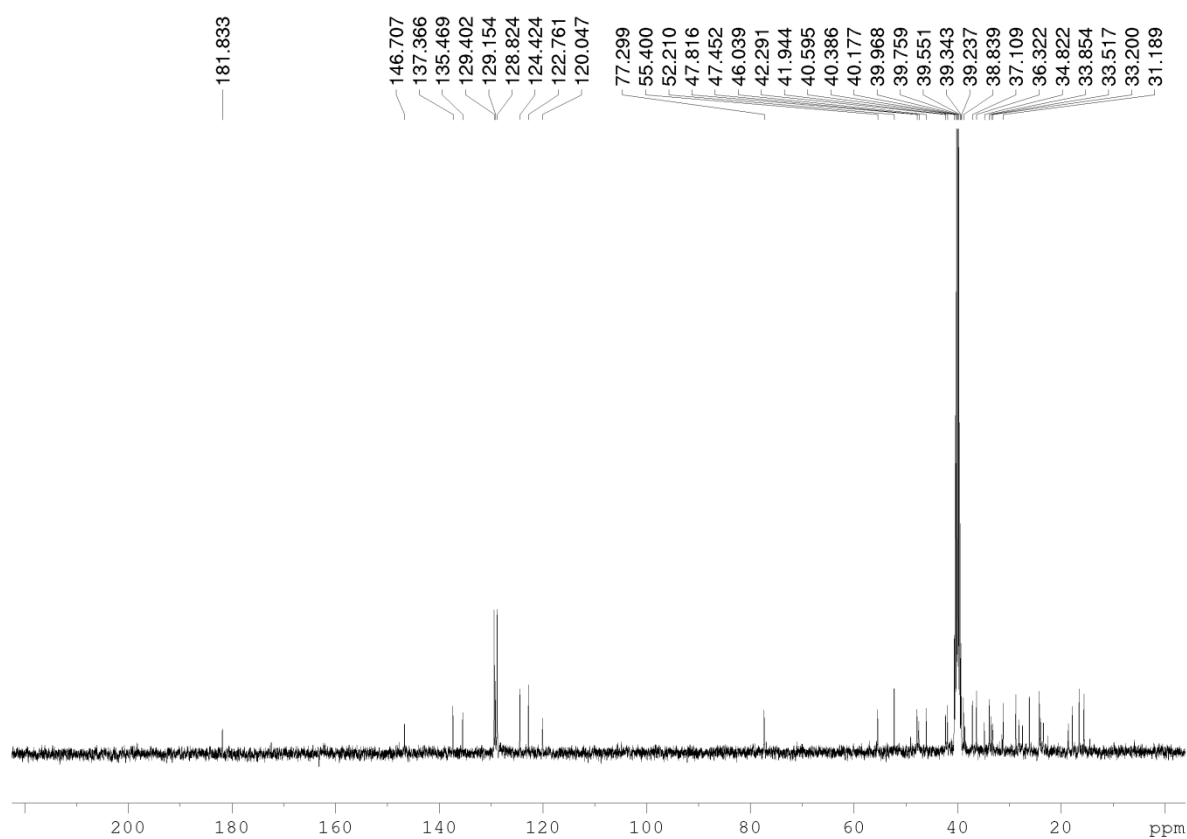

**Figure S83.**  $^1\text{H}$  NMR Spectrum of compound **15d** (400 MHz,  $\text{DMSO-d}_6$ )

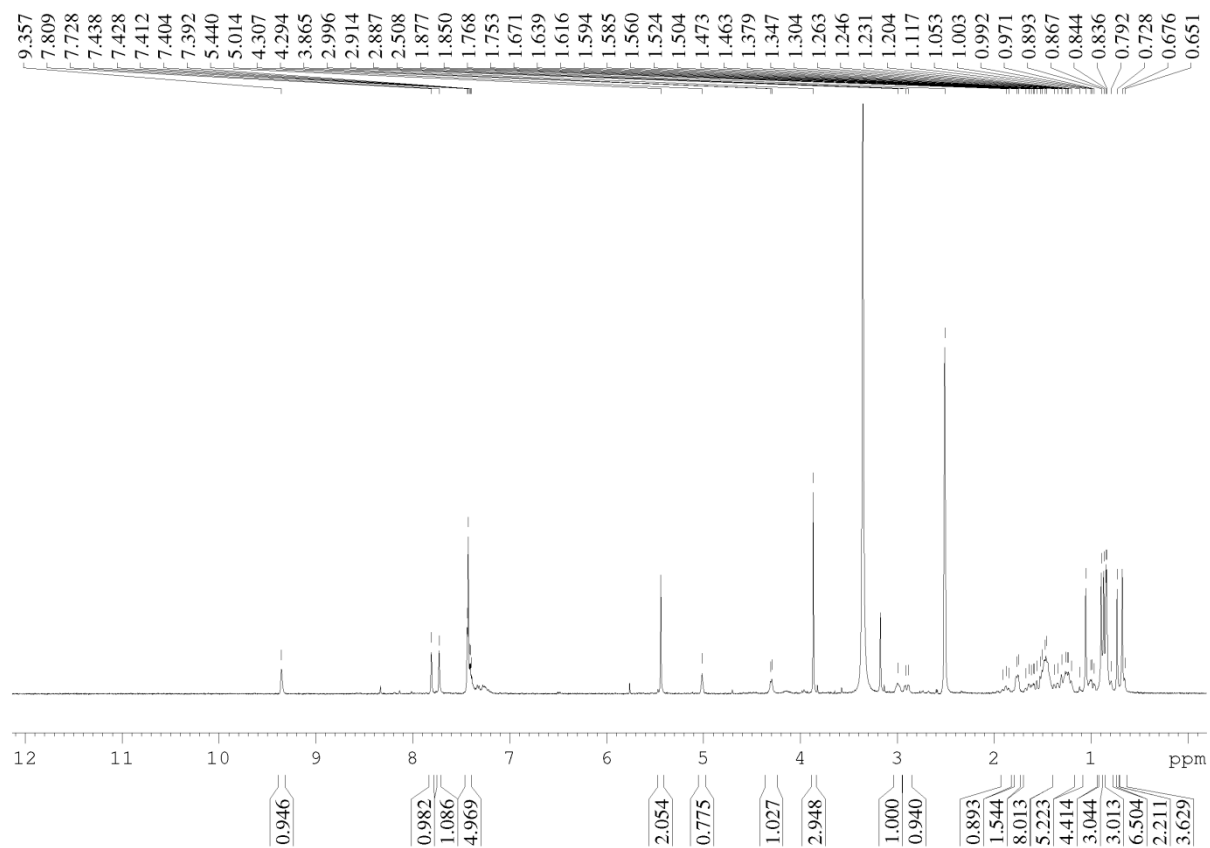

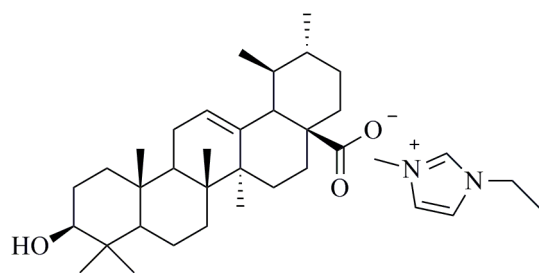

**Figure S84.**  $^{13}\text{C}$  NMR Spectrum of compound **16a** (100 MHz,  $\text{DMSO-d}_6$ )

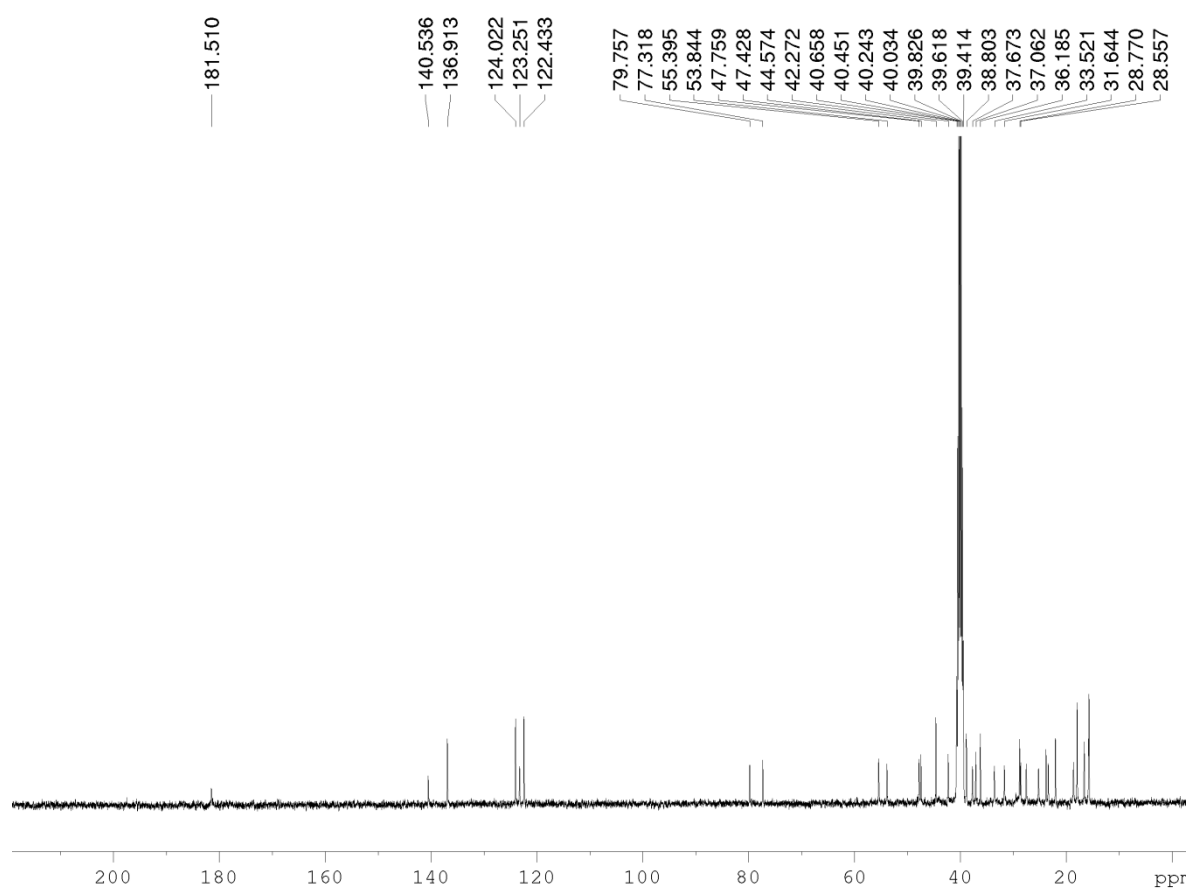

**Figure S85.**  $^1\text{H}$  NMR Spectrum of compound **16a** (400 MHz,  $\text{DMSO-d}_6$ )

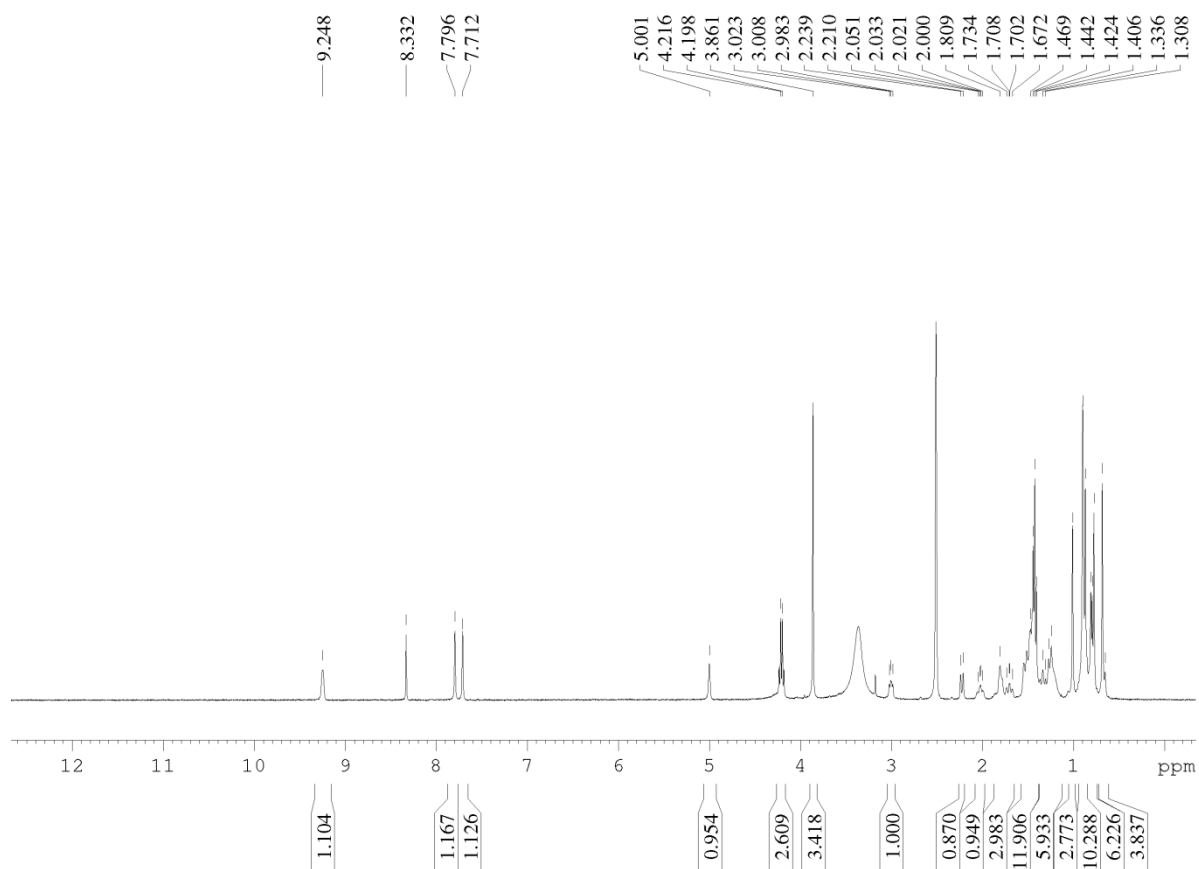

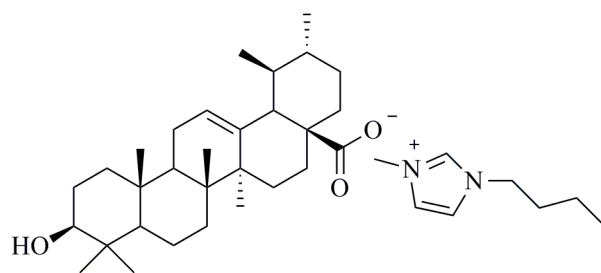

**Figure S86.**  $^{13}\text{C}$  NMR Spectrum of compound **16b** (100 MHz,  $\text{DMSO-d}_6$ )

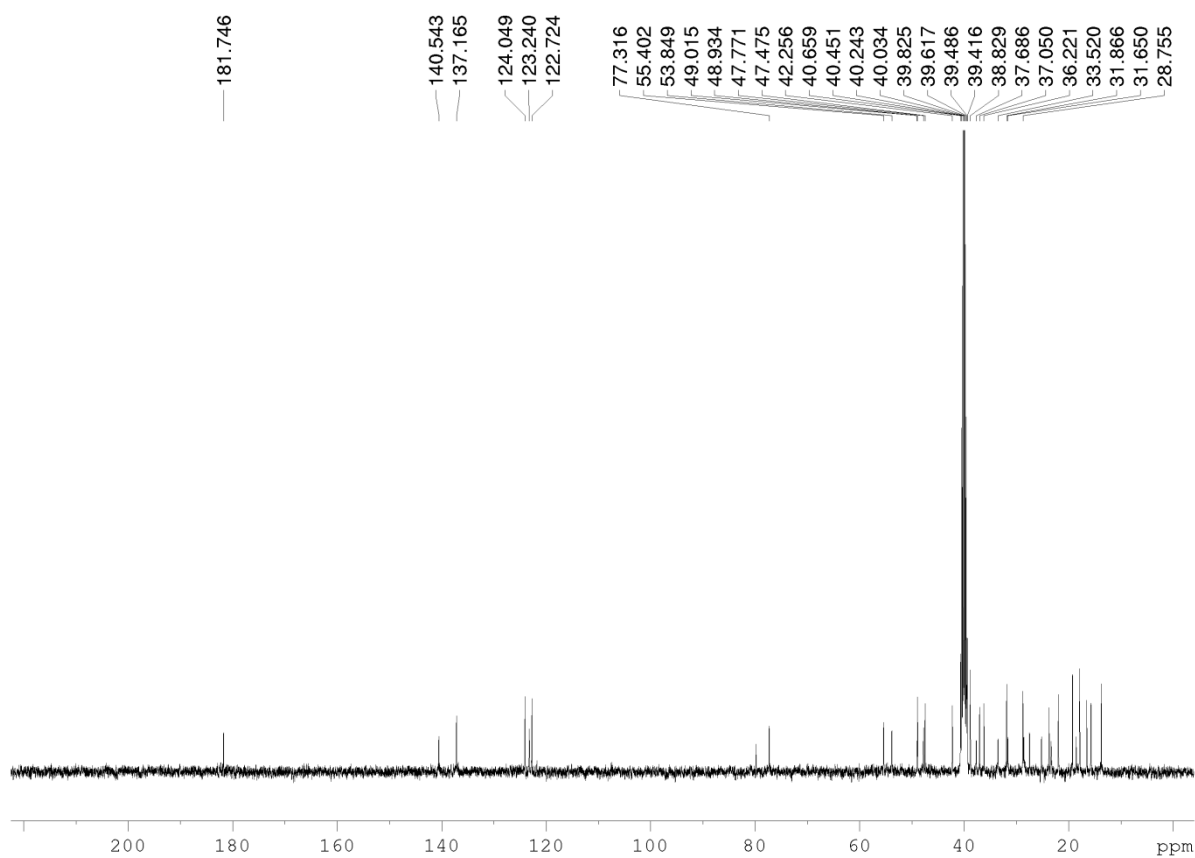

**Figure S87.**  $^1\text{H}$  NMR Spectrum of compound **16b** (400 MHz,  $\text{DMSO-d}_6$ )

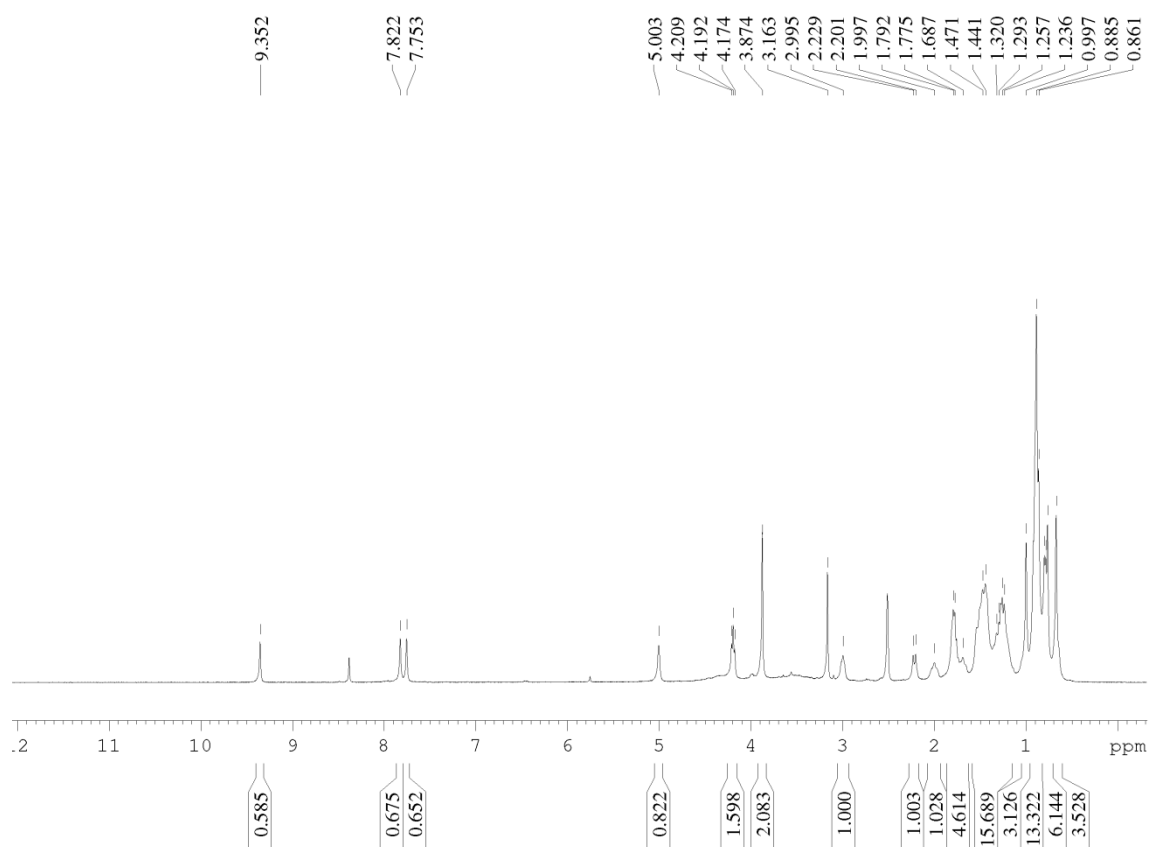

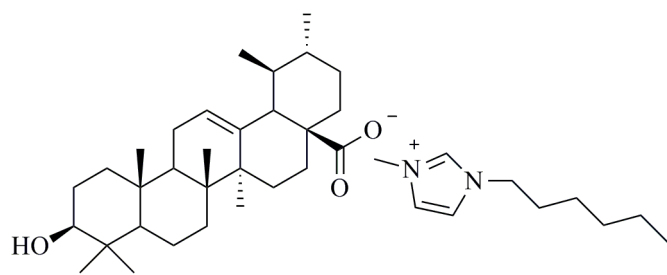

**Figure S88.**  $^{13}\text{C}$  NMR Spectrum of compound **16c** (100 MHz,  $\text{DMSO-d}_6$ )

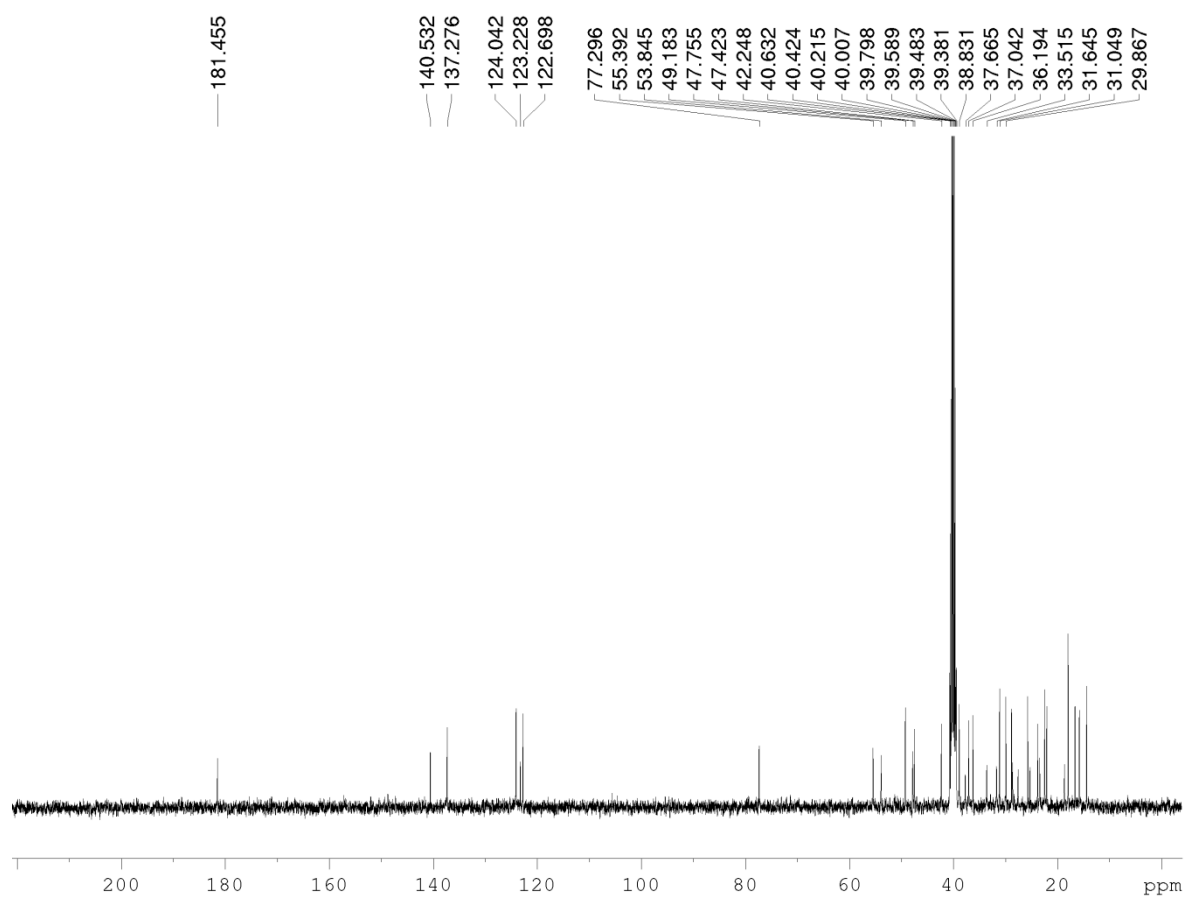



**Figure S89.**  $^1\text{H}$  NMR Spectrum of compound **16c** (400 MHz,  $\text{DMSO-d}_6$ )

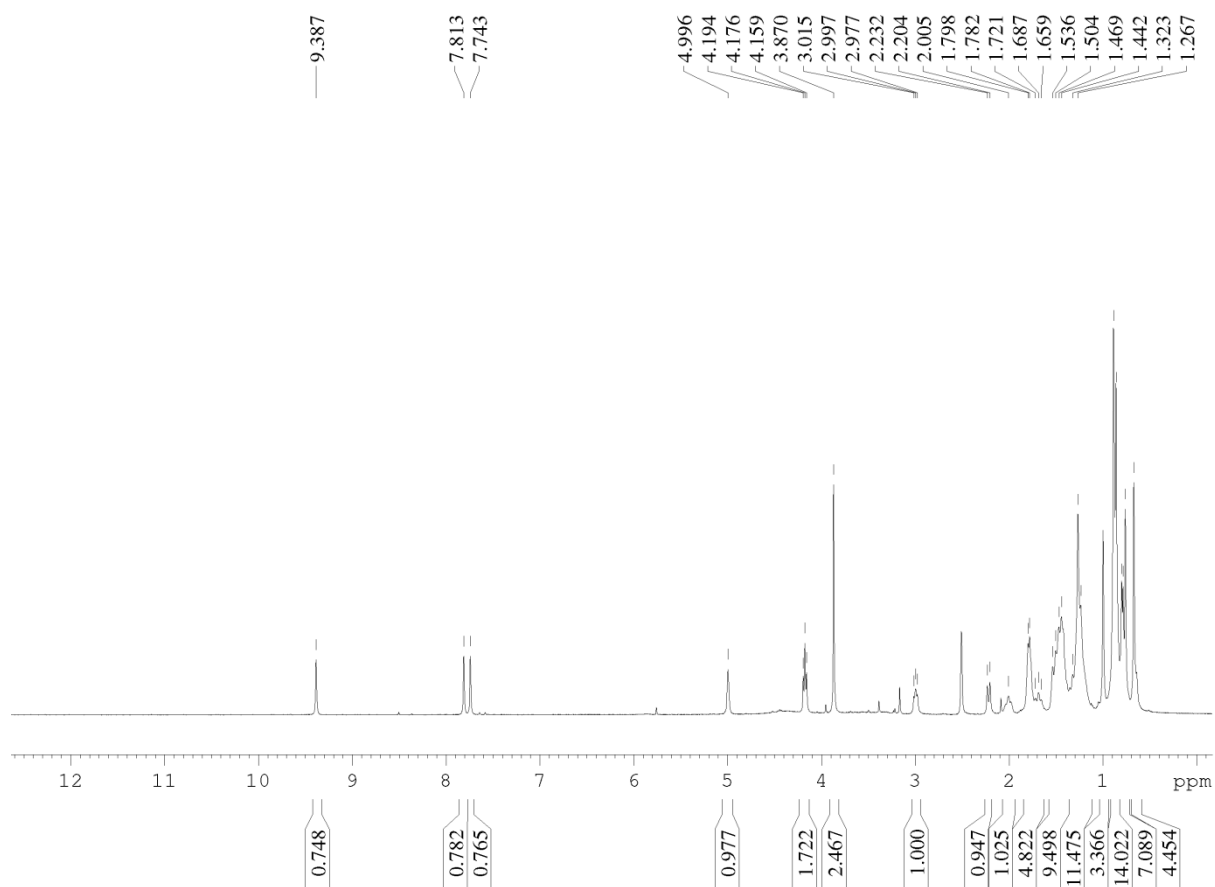

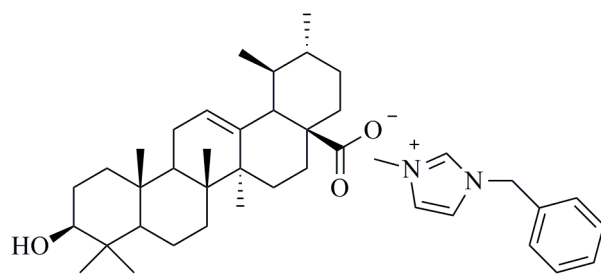

**Figure S90.**  $^{13}\text{C}$  NMR Spectrum of compound **16d** (100 MHz,  $\text{DMSO-d}_6$ )

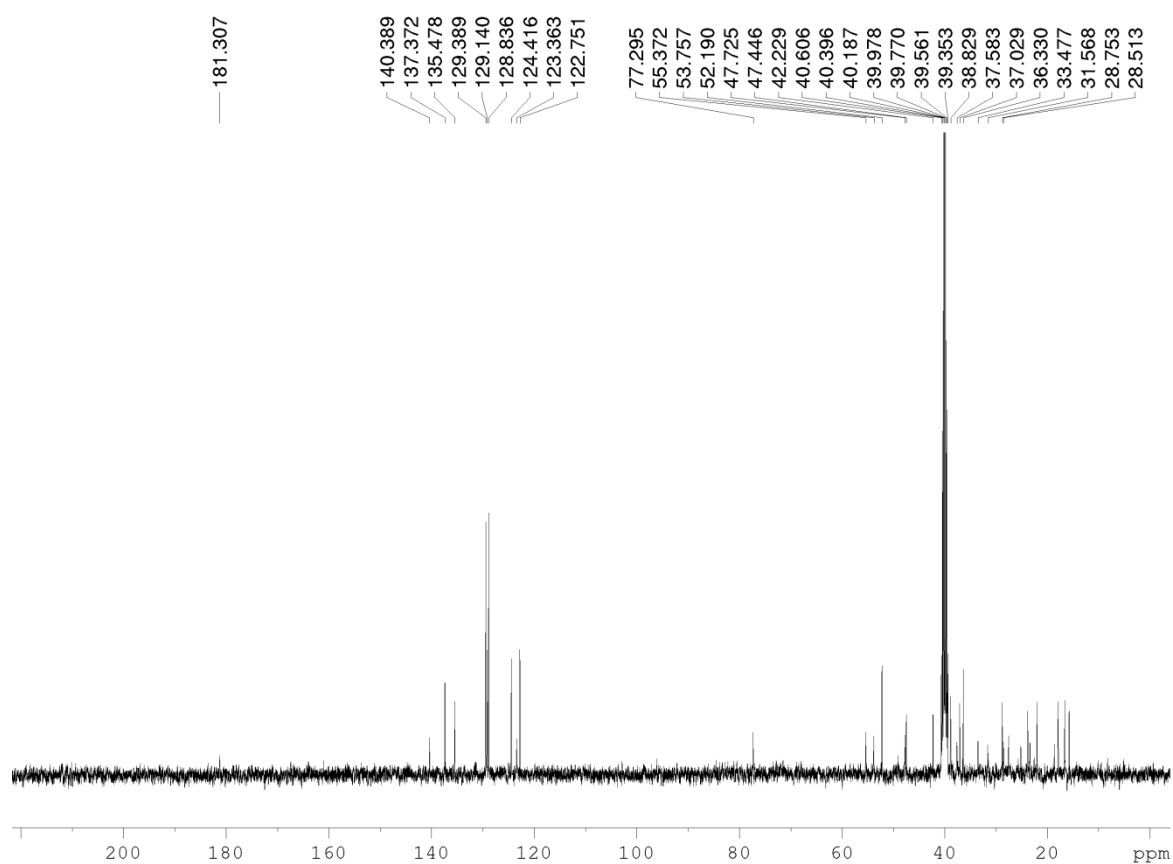

**Figure S91.**  $^1\text{H}$  NMR Spectrum of compound **16d** (400 MHz,  $\text{DMSO-d}_6$ )

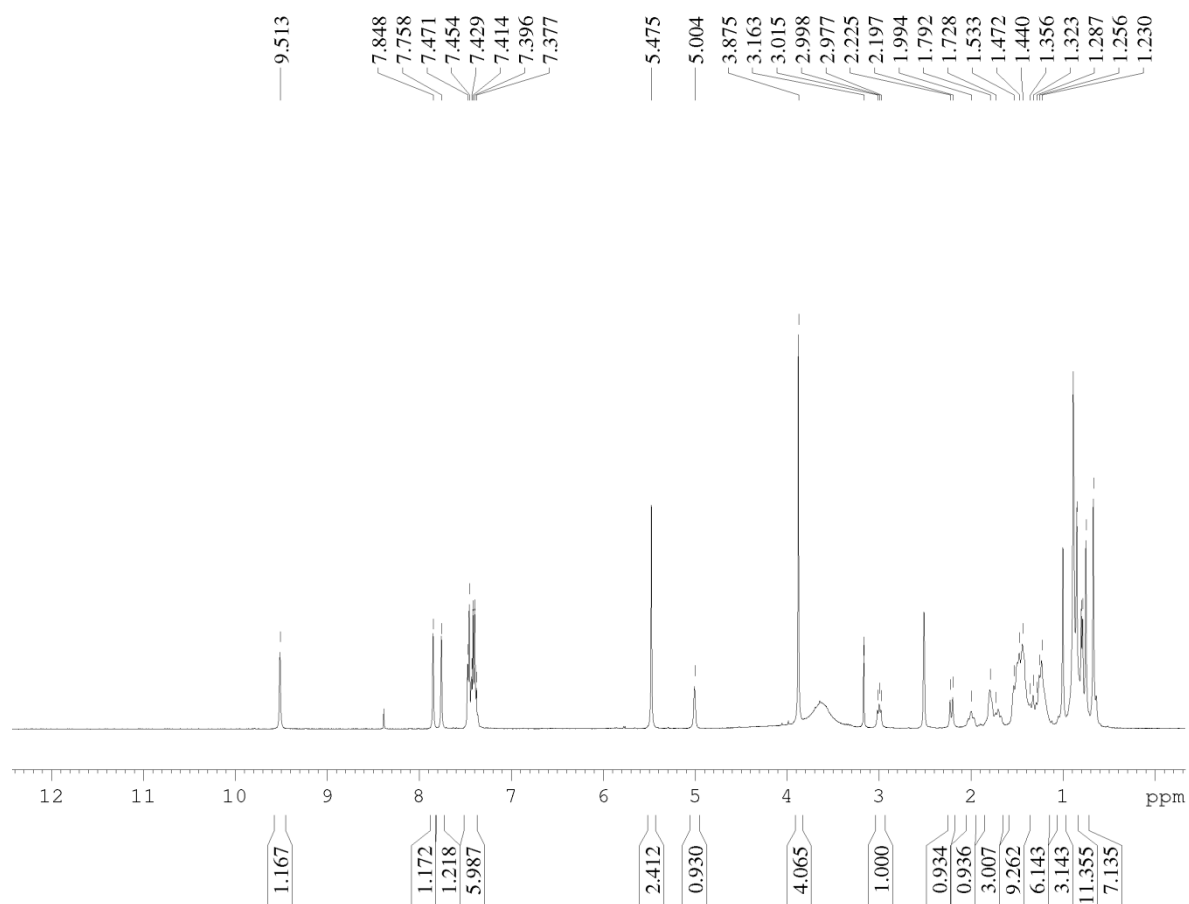

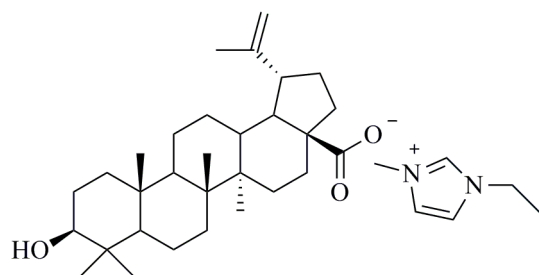

**Figure S92.**  $^{13}\text{C}$  NMR Spectrum of compound **17a** (100 MHz,  $\text{DMSO-d}_6$ )

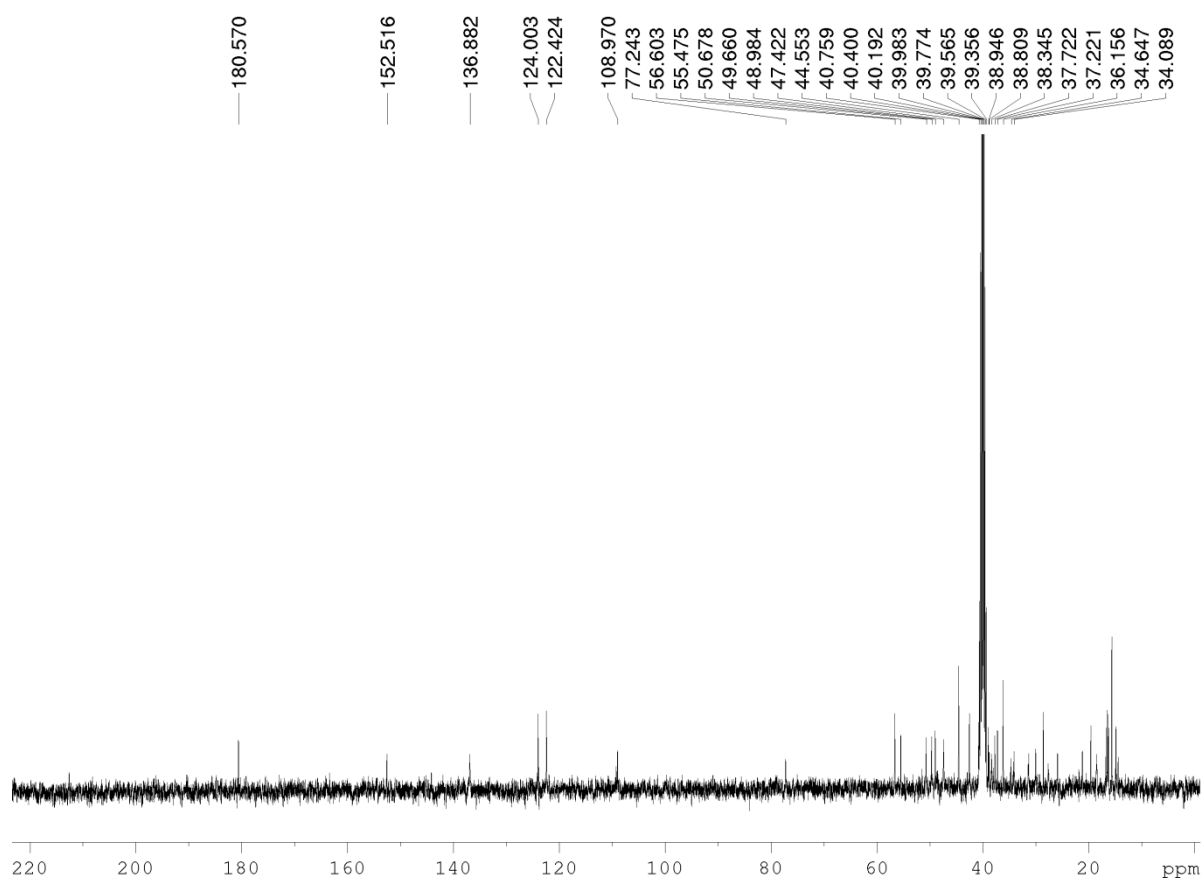

**Figure S93.**  $^1\text{H}$  NMR Spectrum of compound **17a** (400 MHz,  $\text{DMSO-d}_6$ )

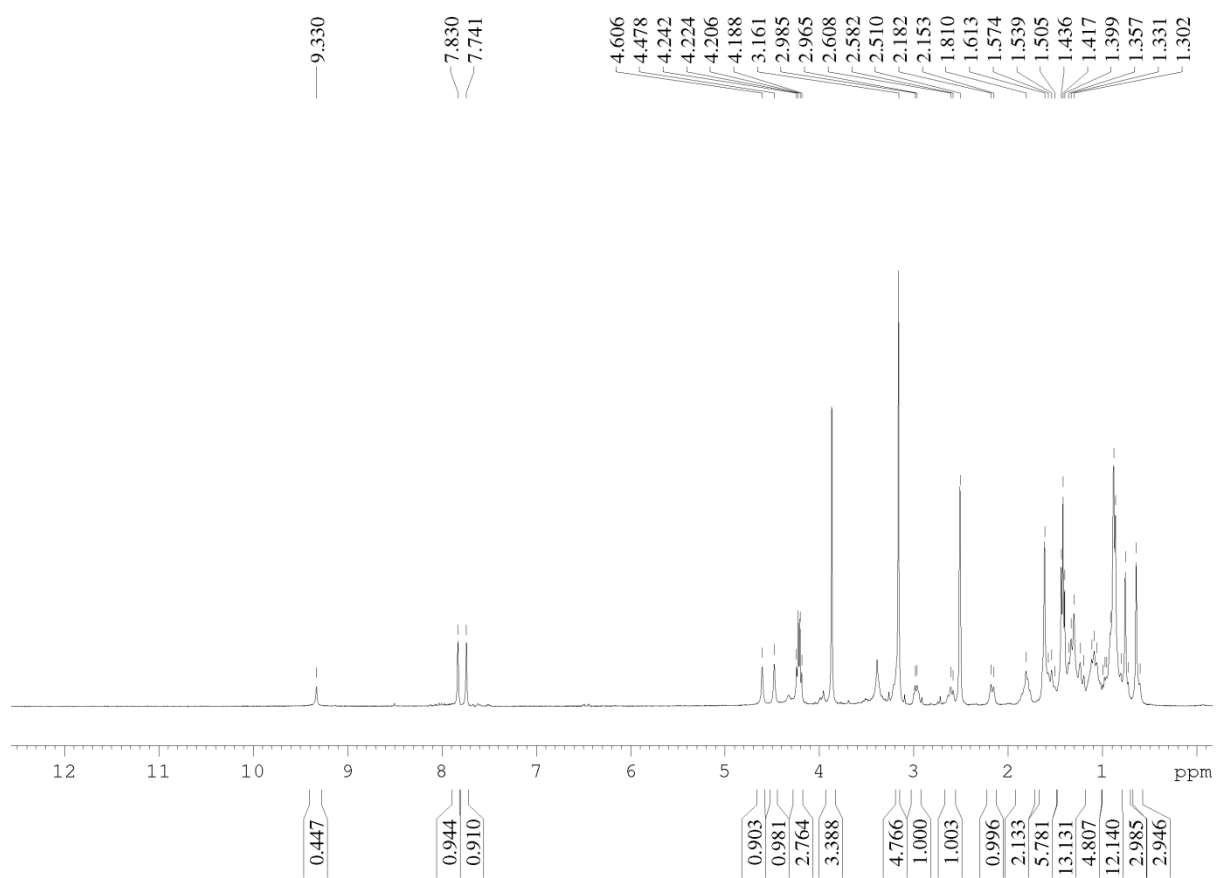

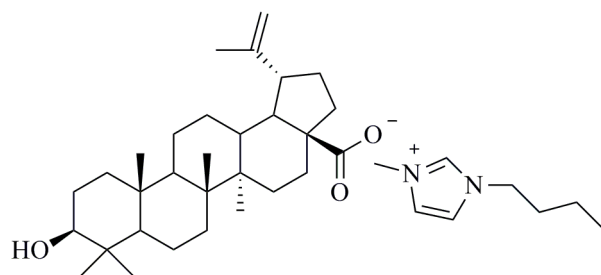

**Figure S94.**  $^{13}\text{C}$  NMR Spectrum of compound **17b** (100 MHz,  $\text{DMSO-d}_6$ )

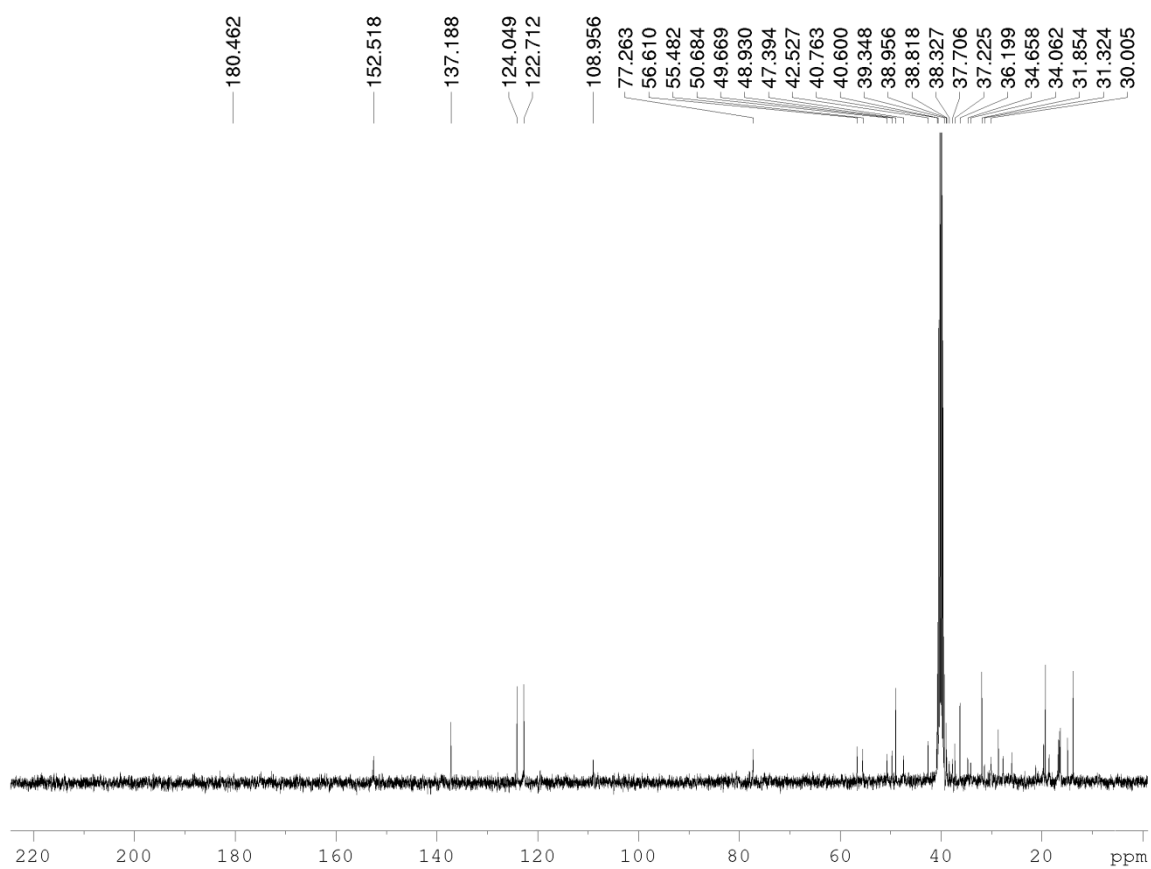

**Figure S95.**  $^1\text{H}$  NMR Spectrum of compound **17b** (400 MHz,  $\text{DMSO-d}_6$ )

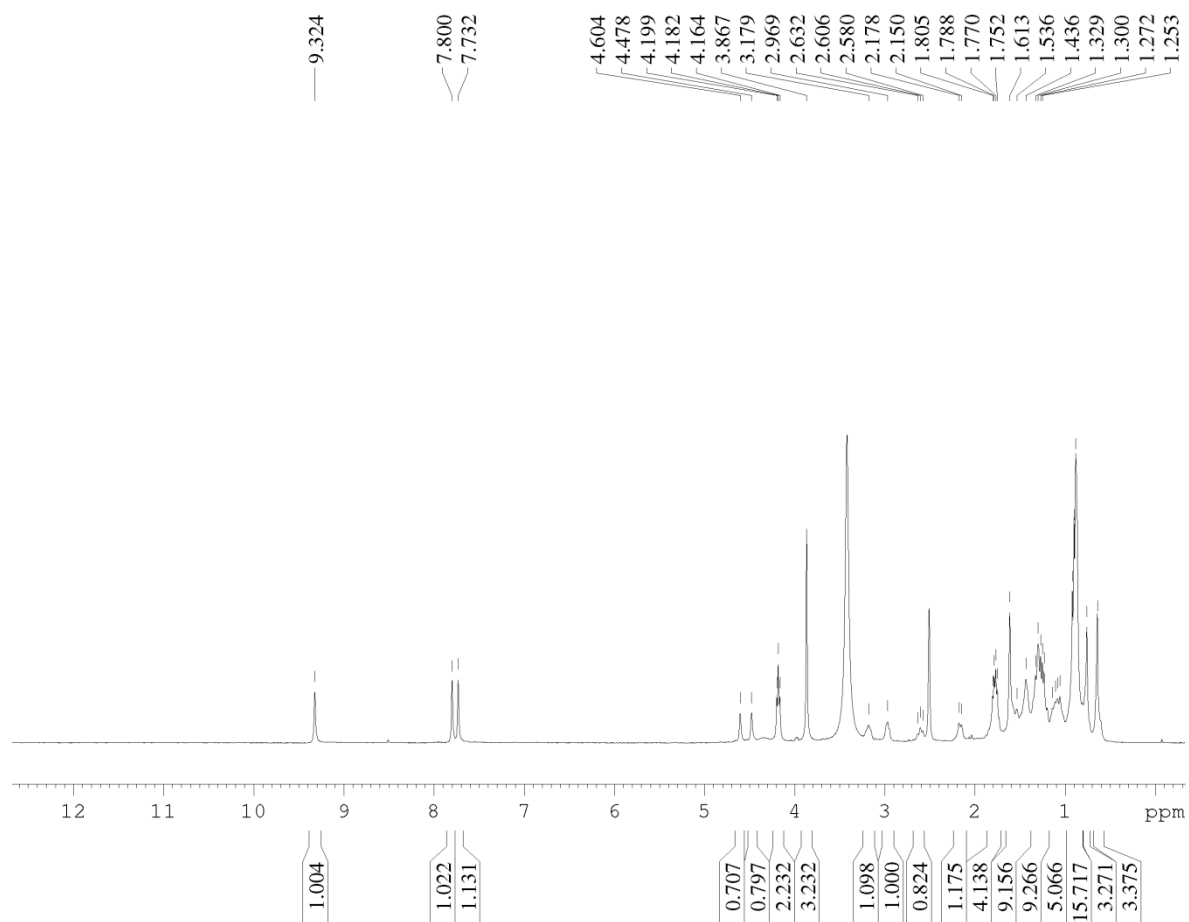

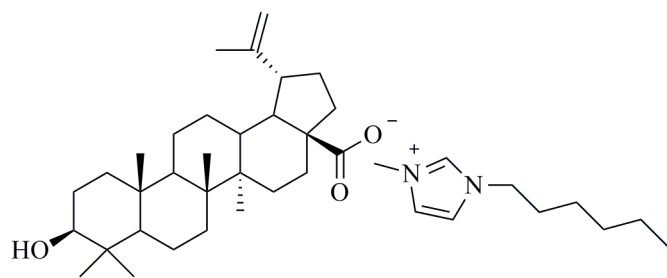

**Figure S96.**  $^{13}\text{C}$  NMR Spectrum of compound **17c** (100 MHz,  $\text{DMSO-d}_6$ )

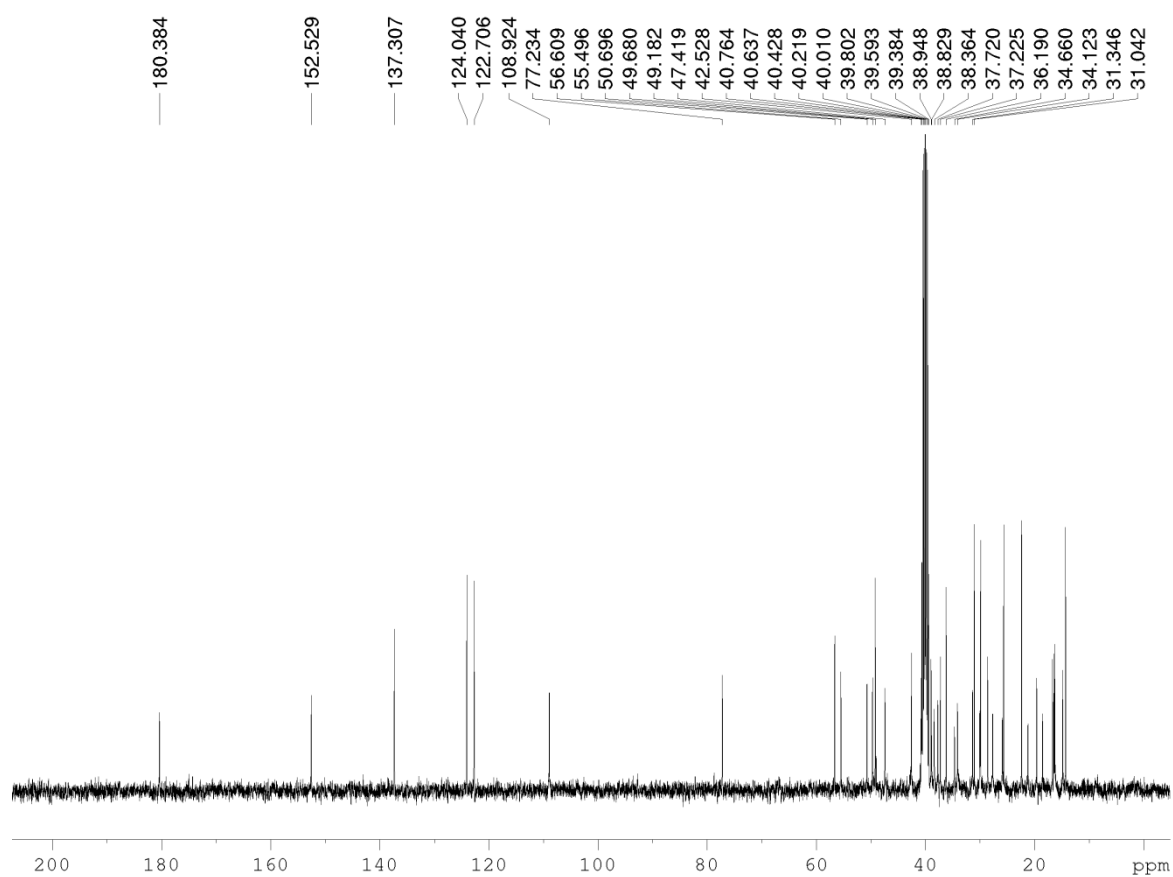



**Figure S97.**  $^1\text{H}$  NMR Spectrum of compound **17c** (400 MHz,  $\text{DMSO-d}_6$ )

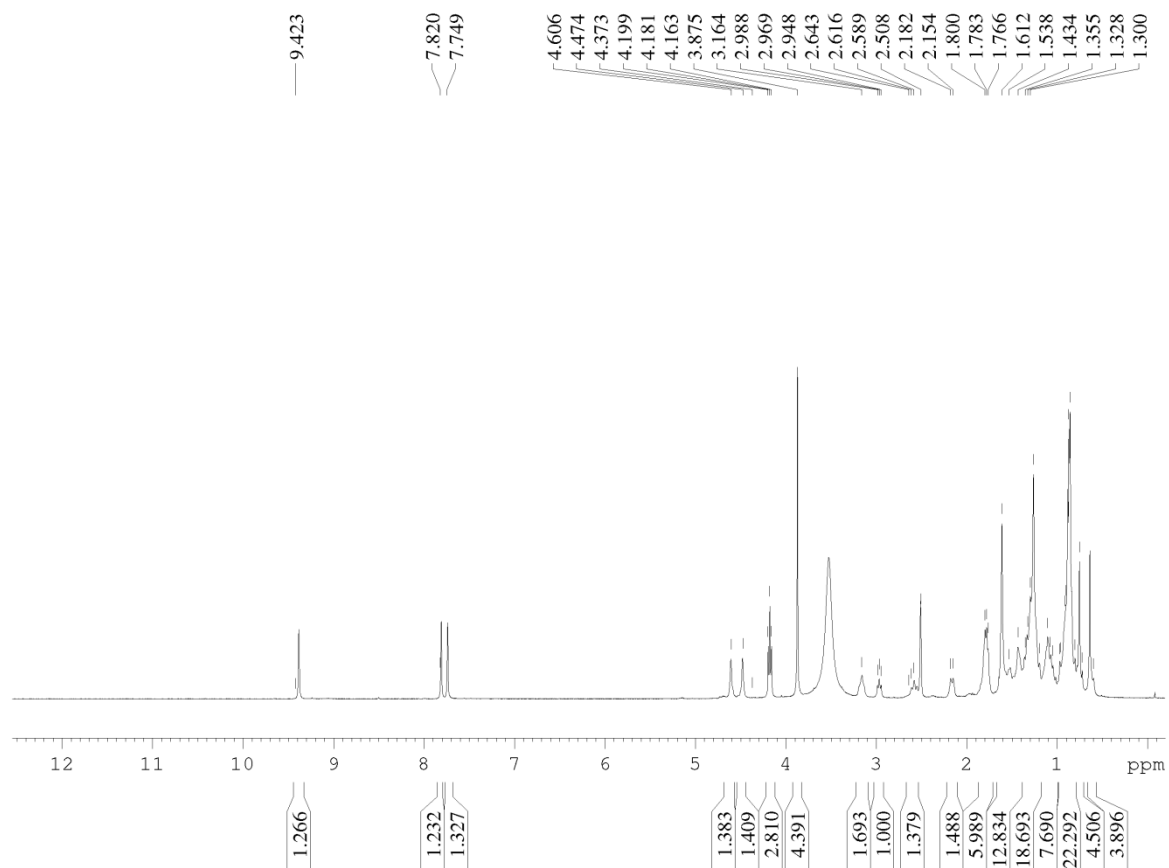

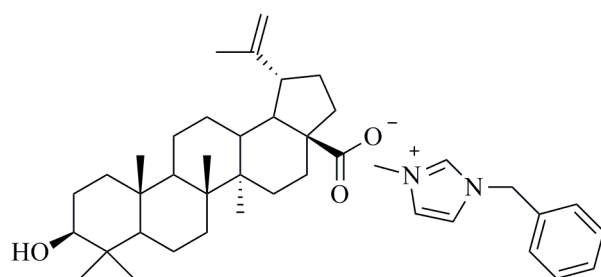

**Figure S98.**  $^{13}\text{C}$  NMR Spectrum of compound **17d** (100 MHz,  $\text{DMSO-d}_6$ )

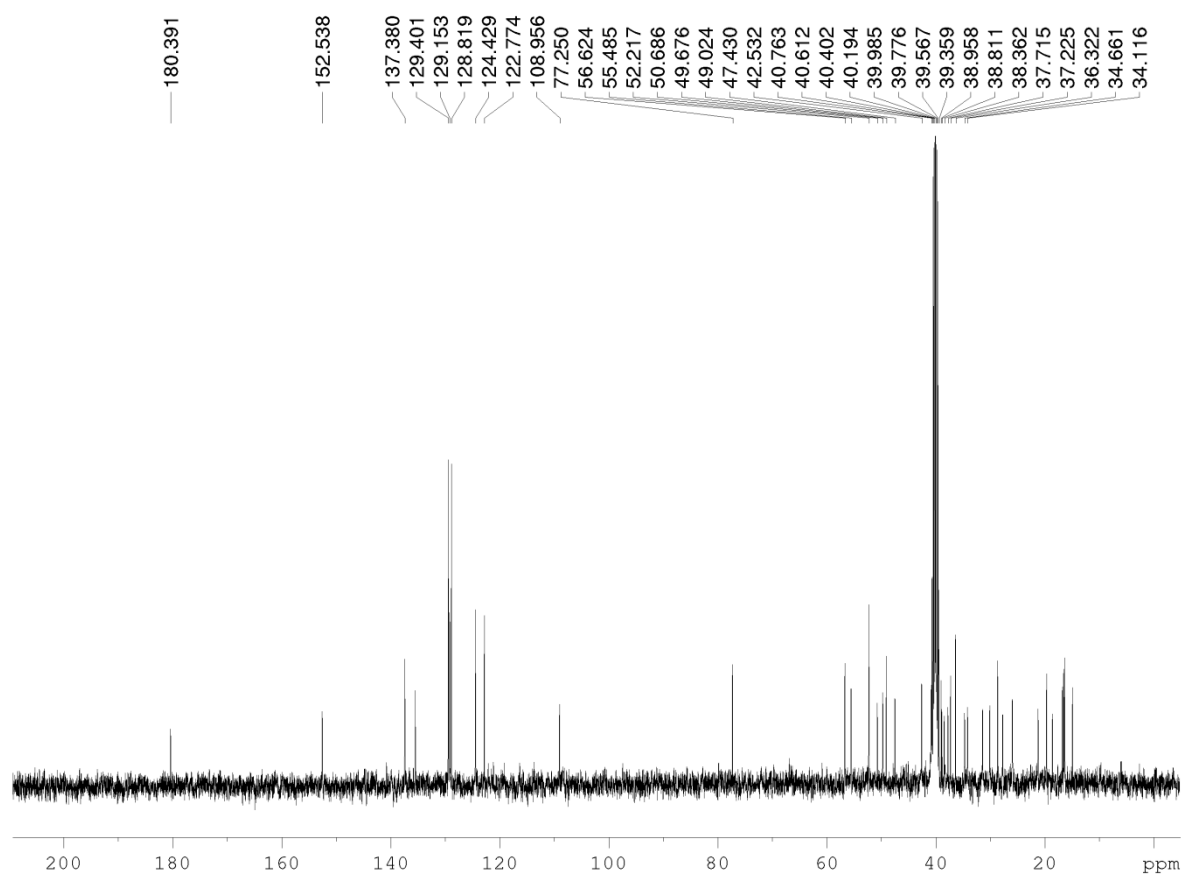

**Figure S99.**  $^1\text{H}$  NMR Spectrum of compound **17d** (400 MHz,  $\text{DMSO-d}_6$ )

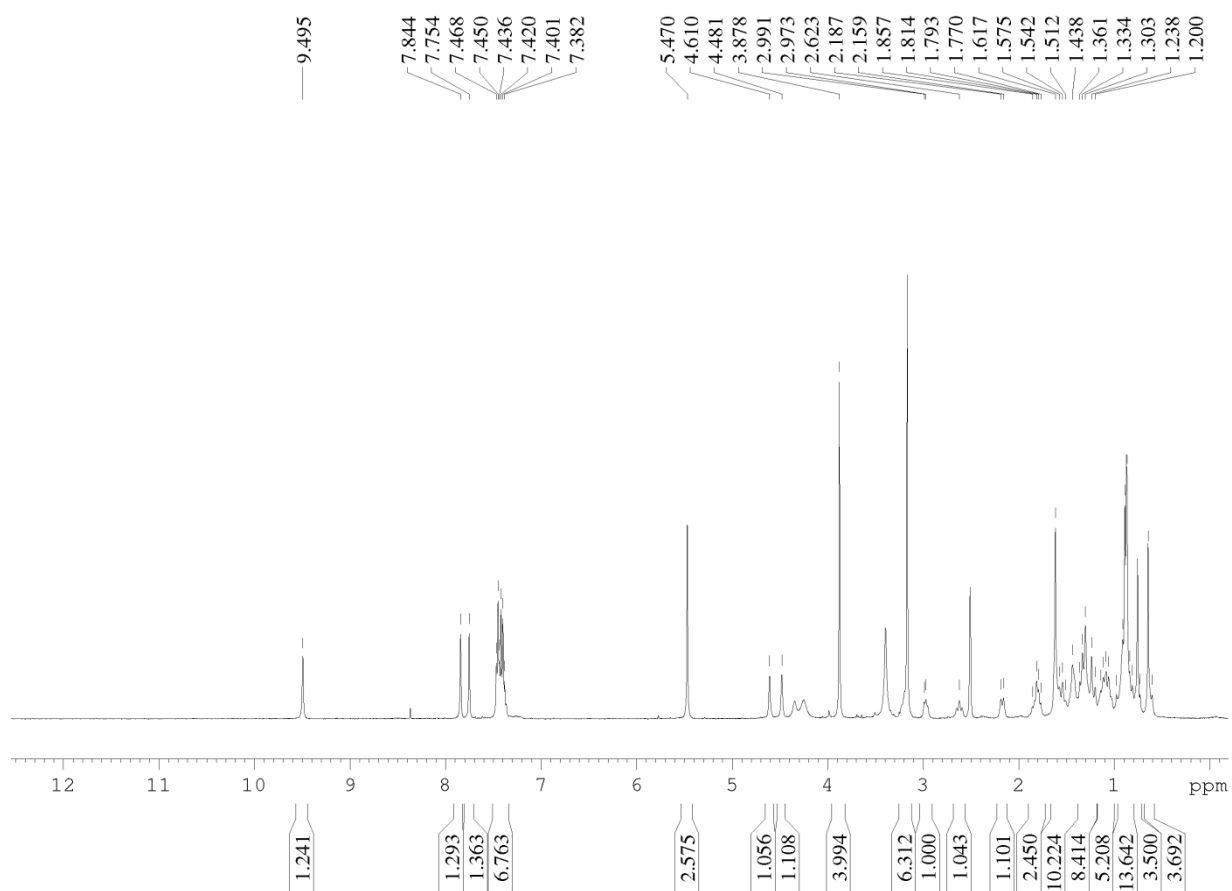

Supplement: s1 [file s1]
